# Supplementary material
Source: PubMed Central journal article supplement (PMC3741217)
Supplement: epi-8-477-s01.pdf [file epi-8-477-s01.pdf]

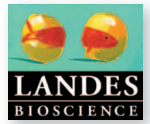

## **Supplemental Material to:**

**Xing-Jun Cao, Anna M. Arnaudo and Benjamin A. Garcia**

**Large-scale global identification of protein lysine  
methylation in vivo**

**Epigenetics 2012; 8(5)**

**<http://dx.doi.org/10.4161/epi.24547>**

**[http://www.landesbioscience.com/journals/epigenetics/  
article/24547/](http://www.landesbioscience.com/journals/epigenetics/article/24547/)**

**Supplement Figure 1: Detection of methylation levels in wild type (WT), shRNA control transfected (shRNA control) and EZH2-knockdown (EZH2 KD) 293 cells.** The grey arrows are pointed to the protein bands that methylation levels decreased in the EZH2-knockdown 293 cells compared to those in shRNA control transfected 293 cells.

**Supplement Figure 2: Recognition of histone H3 and H4 methylation by methyltransferase G9a.** Recombinant histone octamers were incubated with GST control and recombinant G9a, respectively, and then subjected to western blotting, detected by pan methyl lysine antibodies respectively.

**Table S1: Methylated peptides identified in our work.** Kme1, Kme2, Kme3 and Mox denote mono-, di- and tri-methylation of lysine, and oxidation of methionine, respectively.

**Table S2: Methylation sites identified in our work.** The positions of methylation sites are where they are in the protein sequences in the IPI human database (version 3.87).

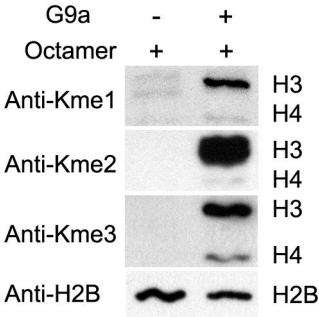

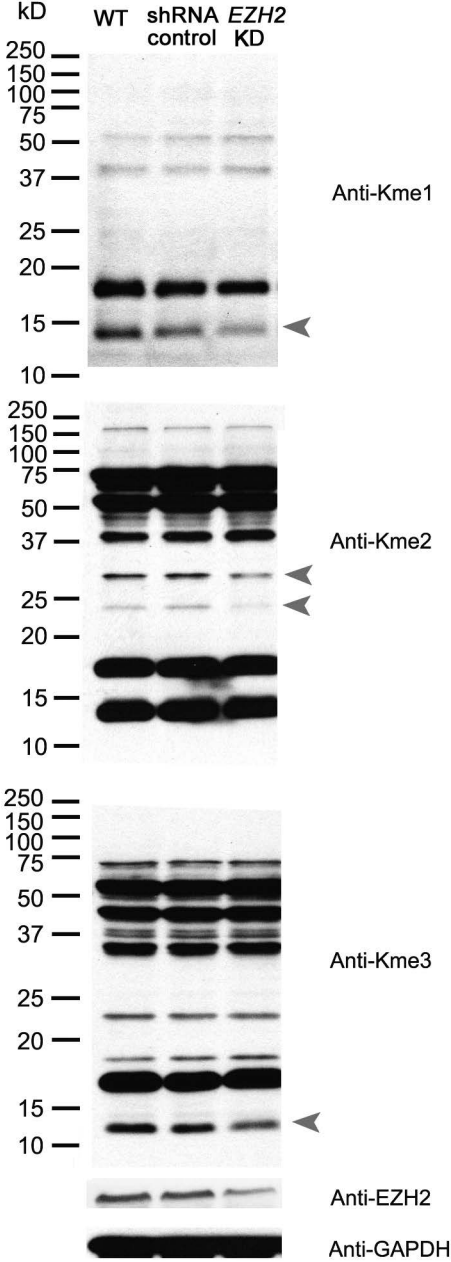

**Table S1: Methylated peptides identified in our work.** Kme1, Kme2, Kme3 and Mox denote m

| Methylated Peptide | Peptide s | PTM postion   | pFind Score | Calc_M    | Delta_M  | ppm      |
|--------------------|-----------|---------------|-------------|-----------|----------|----------|
| TKme1AAAAAAAAAAPA  | TKAAAAA   | 2,K(Mono-met  | 2.85.E-19   | 2610.3613 | 0.00065  | 0.248912 |
| LKme1HMLVLDKMHAR   | LKHMVLD   | 2,K(Mono-met  | 1.37.E-18   | 1491.8166 | 0.00193  | 1.29285  |
| LAALALASSESSSTPE   | LAALALAS  | 25,K(Mono-me  | 2.60.E-13   | 2865.326  | -0.00334 | -1.16525 |
| GYAFVTFCTKme1      | GYAFVTF   | 8,C(carboxyar | 3.73.E-13   | 1206.5743 | -0.0032  | -2.64993 |
| HFCPNVPIILVGNNKme  | HFCPNVF   | 3,C(carboxyar | 9.22.E-11   | 1748.976  | -0.00038 | -0.21715 |
| QEVDKme1DRLK       | QEVDKDF   | 5,K(Mono-met  | 1.97.E-10   | 1143.6248 | -0.01048 | -9.15586 |
| MoxFIGGLSWDTSKme   | MFIGGLS   | 1,M(Oxidation | 2.85.E-10   | 1498.749  | 0.00757  | 5.047461 |
| Kme1GCLEPIR        | KGCLLEP   | 1,K(Mono-met  | 1.12.E-09   | 1098.6219 | 0.00047  | 0.427417 |
| HFPKme1GMoxR       | HFPKGMF   | 4,K(Mono-met  | 8.92.E-09   | 901.45923 | 0.00217  | 2.404516 |
| PEPAKme1SAPAPK     | PEPAKSA   | 5,K(Mono-met  | 1.48.E-08   | 1105.6132 | -0.00024 | -0.21688 |
| TAFGRMoxLSYKme1YF  | TAFGRML   | 6,M(Oxidation | 1.54.E-08   | 1521.7762 | -0.01493 | -9.80451 |
| Kme1CHYEALGVRR     | KCHYEAL   | 1,K(Mono-met  | 1.67.E-08   | 1401.7299 | -0.01164 | -8.29813 |
| IMKme1AQALR        | IMKAQAL   | 3,K(Mono-met  | 4.54.E-08   | 943.5637  | -0.00002 | -0.02117 |
| WGPMoxKEPTIKme1    | WGPMKE    | 4,M(Oxidation | 7.00.E-08   | 1215.6322 | 0.00267  | 2.194565 |
| TGEGFLCVFAINNSKme  | TGEGFLO   | 7,C(carboxyar | 1.09.E-07   | 1669.8134 | 0.00488  | 2.920712 |
| LKme1QQSELQSQVR    | LKQQSEL   | 2,K(Mono-met  | 1.46.E-07   | 1456.7998 | -0.00437 | -2.99766 |
| MoxPKVMoxKme1DVVF  | MPKVMKI   | 1,M(Oxidation | 1.57.E-07   | 2353.1592 | -0.00557 | -2.36602 |
| Kme1ECTWQVKANDR    | KECTWQV   | 1,K(Mono-met  | 2.02.E-07   | 1547.7515 | -0.01001 | -6.46328 |
| YVQDCFMMWKme1      | YVQDCFN   | 5,C(carboxyar | 2.22.E-07   | 1289.5573 | -0.00263 | -2.03787 |
| KENMAATNWKme1EPK   | KENMAAT   | 10,K(Mono-me  | 2.84.E-07   | 1559.7766 | 0.00541  | 3.466195 |
| GAQLAKme1DIAR      | GAQLAKD   | 6,K(Mono-met  | 2.93.E-07   | 1055.6087 | -0.00398 | -3.76676 |
| Kme1Kme1GFGAMoxLF  | KKGFGAN   | 1,K(Mono-met  | 4.41.E-07   | 1050.6008 | -0.00882 | -8.38723 |
| IHAEVQLKme1NYGKm   | IHAEVQL   | 8,K(Mono-met  | 4.80.E-07   | 1426.7933 | 0.01121  | 7.851175 |
| NREMKme1IAIR       | NREMKIA   | 5,K(Mono-met  | 5.01.E-07   | 1143.6546 | -0.01138 | -9.9419  |
| RKMoxNLKme1IQELR   | RKMNLKI   | 3,M(Oxidation | 5.53.E-07   | 1457.85   | -0.01098 | -7.5265  |
| EQSKme1ELQMKLEKL   | EQSKELG   | 4,K(Mono-met  | 5.84.E-07   | 1772.9819 | -0.01265 | -7.13087 |
| QIKMFKGFEEKme1VK   | QIKMFKG   | 10,K(Mono-me  | 8.11.E-07   | 1495.8585 | -0.01489 | -9.94755 |
| NYAKASRNVEESEKme   | NYAKASR   | 14,K(Mono-me  | 8.40.E-07   | 1637.8009 | 0.0141   | 8.60374  |
| Kme1KKEQGQER       | KKKEQGG   | 1,K(Mono-met  | 9.49.E-07   | 1143.636  | 0.00348  | 3.040239 |
| LDLRDDKme1DTIEK    | LDLRDDK   | 7,K(Mono-met  | 1.02.E-06   | 1473.7675 | 0.0092   | 6.238202 |
| SVKEVKEVSPEVKme1   | SVKEVKE   | 13,K(Mono-me  | 1.10.E-06   | 1470.8294 | -0.00391 | -2.65655 |
| LTVTSQNLQLENLRMox  | LTVTSQN   | 15,M(Oxidatio | 1.17.E-06   | 2269.2828 | -0.01529 | -6.73487 |
| IYHEQQVKme1TR      | IYHEQQV   | 8,K(Mono-met  | 1.18.E-06   | 1314.7044 | -0.00364 | -2.76657 |
| FQYHIEIAPGKGDLPVL  | FQYHIEIA  | 20,K(Mono-me  | 1.38.E-06   | 2555.3822 | -0.00144 | -0.5633  |
| Kme1RDAQVIADMEAQ   | KRDAQVI   | 1,K(Mono-met  | 1.47.E-06   | 1851.9625 | 0.01439  | 7.765852 |
| LRELCRQWLQPEMoxH   | LRELCRQ   | 5,C(carboxyar | 1.51.E-06   | 2140.067  | 0.01917  | 8.953369 |
| PFCFSVKme1GHVKme   | PFCFSVK   | 3,C(carboxyar | 1.65.E-06   | 1732.9269 | 0.00424  | 2.4453   |
| MoxVSNTKme1SVDTK   | MVSNTKS   | 1,M(Oxidation | 1.77.E-06   | 1698.8458 | -0.00963 | -5.66523 |
| PSTQHKme1HER       | PSTQHKH   | 6,K(Mono-met  | 1.78.E-06   | 1132.5738 | 0.00809  | 7.136625 |
| TKme1ATMNAIREER    | TKATMNA   | 2,K(Mono-met  | 1.83.E-06   | 1432.7456 | -0.00332 | -2.31561 |
| VFPRSTLGKme1LFR    | VFPRSTL   | 9,K(Mono-met  | 2.10.E-06   | 1433.8507 | 0.00117  | 0.815411 |
| MGDVKme1ALLFVVA    | MGDVKAI   | 5,K(Mono-met  | 2.72.E-06   | 1730.0025 | -0.01057 | -6.1063  |
| TKme1DKme1VNK      | TKDKVNK   | 2,K(Mono-met  | 2.74.E-06   | 859.51272 | 0.00336  | 3.904601 |
| Kme1SLIGGNHSHKme1  | KSLIGGN   | 1,K(Mono-met  | 2.97.E-06   | 1067.6088 | -0.00331 | -3.09747 |
| Kme1EMPSVFGKme1E   | KEMPSVF   | 1,K(Mono-met  | 3.64.E-06   | 1434.7541 | 0.00733  | 5.105279 |
| PQNLLINEKGELKme1   | PQNLLINE  | 13,K(Mono-me  | 3.65.E-06   | 1508.8562 | -0.01478 | -9.78906 |

|                   |          |               |           |           |          |          |
|-------------------|----------|---------------|-----------|-----------|----------|----------|
| TKme1ETLQSEEQRR   | TKETLQS  | 2,K(Mono-met  | 3.68.E-06 | 1645.8384 | 0.00812  | 4.930614 |
| LQKEKme1EELERR    | LQKEKEE  | 5,K(Mono-met  | 3.94.E-06 | 1470.8154 | -0.00041 | -0.27857 |
| LQYEDKme1FRNN     | LQYEDKF  | 6,K(Mono-met  | 4.03.E-06 | 1339.6521 | 0.00071  | 0.52959  |
| MTMDKme1TGLLLSD   | MTMDKT   | 5,K(Mono-met  | 4.40.E-06 | 1804.9315 | 0.00752  | 4.164022 |
| RPFSFKme1KR       | RPFSFKK  | 6,K(Mono-met  | 4.54.E-06 | 1078.64   | -0.00956 | -8.85482 |
| LQEETGAKme1ISVLGK | LQEETGA  | 8,K(Mono-met  | 4.57.E-06 | 1499.8559 | -0.015   | -9.99435 |
| MMKme1RQLHR       | MMKRQL   | 3,K(Mono-met  | 4.58.E-06 | 1112.6059 | -0.00014 | -0.12572 |
| Kme1PSSVR         | KPSSVR   | 1,K(Mono-met  | 5.10.E-06 | 686.40752 | -0.00208 | -3.02584 |
| LFNLAKme1DIFPNEK  | LFNLAKD  | 6,K(Mono-met  | 5.40.E-06 | 1575.8661 | -0.00518 | -3.28499 |
| YYELKme1LAEMoxQR  | YYELKLA  | 5,K(Mono-met  | 5.51.E-06 | 1472.7333 | -0.00509 | -3.45381 |
| LCDSYEIRPGKme1HLC | LCDSYEIR | 2,C(carboxyar | 6.13.E-06 | 2671.3323 | 0.02492  | 9.325075 |
| SLQQGPDGLRKme1    | SLQQGPD  | 11,K(Mono-me  | 7.01.E-06 | 1211.6622 | -0.01013 | -8.35354 |
| EMoxESVMoxKme1    | EMESVM   | 2,M(Oxidation | 7.68.E-06 | 898.37759 | 0.00223  | 2.479466 |
| QKme1MoxRSTKLLR   | QKMRST   | 2,K(Mono-met  | 7.93.E-06 | 1289.7602 | -0.00717 | -5.55487 |
| TLKEQLNLLSRAEEAK  | TLKEQLN  | 16,K(Mono-me  | 9.51.E-06 | 1984.1317 | -0.01945 | -9.7979  |
| Kme1GNCEVSSVEGTL  | KGNCEVS  | 1,K(Mono-met  | 9.99.E-06 | 2354.161  | -0.00295 | -1.25257 |
| Kme1AEAGAGSATEFQ  | KAEAGAG  | 1,K(Mono-met  | 1.18.E-05 | 1582.774  | 0.01323  | 8.353357 |
| FWAKme1MoxRYHMox  | FWAKMR   | 4,K(Mono-met  | 1.36.E-05 | 1638.8163 | -0.00975 | -5.9458  |
| Kme1YIMoxLEIK     | KYIMLEIK | 1,K(Mono-met  | 1.39.E-05 | 1066.6096 | -0.00641 | -6.00406 |
| RAVDEKYRYKme1     | RAVDEKY  | 10,K(Mono-me  | 1.43.E-05 | 1340.7201 | -0.0073  | -5.44078 |
| KVHTGERPYECGECG   | KVHTGER  | 11,C(carboxya | 1.52.E-05 | 1919.8618 | -0.00384 | -1.9991  |
| MoxVWEQKme1SATIV  | MVWEQK   | 1,M(Oxidation | 2.17.E-05 | 2320.2283 | -0.00534 | -2.3005  |
| SNCVKme1EVEKLQEK  | SNCVKEV  | 3,C(carboxyar | 2.18.E-05 | 1617.8396 | 0.00538  | 3.323342 |
| FNSTEYQVVTRVDKme  | FNSTEYQ  | 14,K(Mono-me  | 2.42.E-05 | 1698.8577 | 0.00296  | 1.741312 |
| MKEQPVLERLQSQKme  | MKEQPVL  | 14,K(Mono-me  | 2.56.E-05 | 2241.2304 | 0.01689  | 7.532597 |
| NGHDKVVQLLLKme1K  | NGHDKV   | 12,K(Mono-me  | 3.27.E-05 | 1518.9246 | 0.00846  | 5.566008 |
| HNAEKme1LLNVVK    | HNAEKLL  | 5,K(Mono-met  | 3.61.E-05 | 1277.7456 | -0.0104  | -8.13299 |
| MAVTKme1ELLQMDLY  | MAVTKEL  | 5,K(Mono-met  | 3.61.E-05 | 2820.5017 | 0.0004   | 0.141768 |
| GFAFVTFDHDSVDK    | GFAFVTF  | 15,K(Mono-me  | 3.77.E-05 | 1712.7682 | 0.00086  | 0.501816 |
| SEKme1EQRQALQR    | SEKEQR   | 3,K(Mono-met  | 4.35.E-05 | 1385.7375 | -0.00016 | -0.11538 |
| GYISPYFINTSKGKme1 | GYISPYFI | 14,K(Mono-me  | 5.29.E-05 | 1701.8726 | 0.00626  | 3.676112 |
| EYKme1LLYSMK      | EYKLLYS  | 3,K(Mono-met  | 5.55.E-05 | 1187.626  | -0.00145 | -1.21989 |
| LQNIMoxMoxLLRKme1 | LQNIMML  | 5,M(Oxidation | 5.62.E-05 | 1304.7308 | -0.00288 | -2.20565 |
| TKme1EELEAEKme1R  | TKEELEA  | 2,K(Mono-met  | 6.61.E-05 | 1756.9683 | -0.00565 | -3.21393 |
| EQIKme1VLNDKFASFI | EQIKVLN  | 4,K(Mono-met  | 7.50.E-05 | 2163.2052 | -0.00908 | -4.19554 |
| FFPLESWQIGKme1IGT | FFPLESW  | 11,K(Mono-me  | 7.70.E-05 | 2243.17   | -0.01468 | -6.54142 |
| MRSALNYRKme1HYED  | MRSALNY  | 9,K(Mono-met  | 8.03.E-05 | 1938.9734 | -0.0142  | -7.31971 |
| PAVPMKme1PMSINSNI | PAVPMKF  | 6,K(Mono-met  | 8.15.E-05 | 3370.8179 | -0.0006  | -0.17795 |
| YKme1VNPIKVDPTMox | YKVNPIK  | 2,K(Mono-met  | 8.26.E-05 | 2077.0918 | 0.00497  | 2.391603 |
| GKme1FKVIALTVLASV | GKFKVIA  | 2,K(Mono-met  | 8.42.E-05 | 2501.4522 | 0.00231  | 0.923091 |
| Kme1LKAHQTPVDILKC | KLKAHQT  | 1,K(Mono-met  | 8.54.E-05 | 1774.0829 | -0.00989 | -5.57158 |
| KRPVWVMLMVNSLTV   | KRPVWV   | 19,K(Mono-me  | 8.58.E-05 | 2514.3815 | 0.02323  | 9.235068 |
| SWPVLWVVTVGWLVTV  | SWPVLW   | 20,K(Mono-me  | 8.81.E-05 | 2308.346  | -0.01814 | -7.85508 |
| EYAIEQALDKme1MEK  | EYAIEQAI | 10,K(Mono-me  | 8.91.E-05 | 1580.7756 | 0.01273  | 8.047816 |
| PQMoxVRSVEALCDAY  | PQMVRS   | 3,M(Oxidation | 9.85.E-05 | 3547.8279 | 0.02861  | 8.061735 |
| HMoxQEMKme1Kme1   | HMQEMK   | 2,M(Oxidation | 1.03.E-04 | 1258.6638 | -0.00374 | -2.96904 |
| MoxITSLSKDQQIGEK  | MITSLSKI | 1,M(Oxidation | 1.03.E-04 | 2066.0314 | -0.00978 | -4.73143 |
| IYKKme1RKme1      | IYKKRK   | 4,K(Mono-met  | 1.07.E-04 | 862.57525 | 0.00097  | 1.123227 |
| WEEGKme1KWQAKme   | WEEGKK   | 5,K(Mono-met  | 1.08.E-04 | 1885.021  | -0.00584 | -3.09646 |

|                    |          |               |           |           |          |          |
|--------------------|----------|---------------|-----------|-----------|----------|----------|
| SQSFGVASASSIKme1C  | SQSFGVA  | 13,K(Mono-me  | 1.10.E-04 | 2380.2209 | 0.01585  | 6.656185 |
| Kme1PNFEVGSRRQLM   | KPNFEVG  | 1,K(Mono-met  | 1.17.E-04 | 2078.1194 | -0.00443 | -2.13071 |
| ILLEKme1MoxELEVAE  | ILLEKMEI | 5,K(Mono-met  | 1.21.E-04 | 1743.9805 | 0.00865  | 4.95703  |
| Kme1KLMoxPGTYTLEI  | KKLMPGT  | 1,K(Mono-met  | 1.24.E-04 | 2239.2538 | 0.00355  | 1.584634 |
| HWLFTEFPELAPSQNC   | HWLFTEF  | 20,K(Mono-me  | 1.25.E-04 | 2449.2179 | -0.02063 | -8.41971 |
| VFFFMOXIILEKme1Kme | VFFFMIIL | 5,M(Oxidation | 1.40.E-04 | 1457.8356 | 0.00109  | 0.747167 |
| VQNHSGSSARGNLSG    | VQNHSGS  | 16,K(Mono-me  | 1.40.E-04 | 2754.278  | -0.00354 | -1.28481 |
| Kme1KSPDFNLTGSQS   | KKSPDFN  | 1,K(Mono-met  | 1.42.E-04 | 1923.9724 | -0.00423 | -2.19743 |
| TKme1LKDCEYPLISR   | TKLKDCE  | 2,K(Mono-met  | 1.46.E-04 | 1578.844  | -0.00037 | -0.2342  |
| IAFNREQRMoxFKme1S  | IAFNREQ  | 9,M(Oxidation | 1.51.E-04 | 1711.894  | 0.00426  | 2.487002 |
| IIMoxLSPDEQALFKme  | IIAMLSPD | 4,M(Oxidation | 1.57.E-04 | 1604.8484 | -0.01396 | -8.69326 |
| FKme1NEIGMLKVEFQA  | FKNEIGM  | 2,K(Mono-met  | 1.72.E-04 | 2294.2344 | 0.00219  | 0.954147 |
| GTEVPMoxDSLILQELSV | GTEVPMI  | 6,M(Oxidation | 1.78.E-04 | 2857.366  | 0.02825  | 9.883146 |
| MKETAEAYLGQPVKme   | MKETAEA  | 14,K(Mono-me  | 1.85.E-04 | 3276.6601 | -0.02677 | -8.16746 |
| Kme1ILHRVR         | KILHRVR  | 1,K(Mono-met  | 1.94.E-04 | 934.61885 | 0.00932  | 9.961145 |
| IMQSSESEVGYDAMAGI  | IMQSSE   | 23,K(Mono-me  | 1.97.E-04 | 2521.1175 | 0.00684  | 2.711992 |
| ILQEHEQIKme1Kme1K  | ILQEHEQ  | 9,K(Mono-met  | 2.04.E-04 | 1791.0731 | 0.0051   | 2.845846 |
| MoxNISKSEITKETSLSK | MNISKSE  | 1,M(Oxidation | 2.14.E-04 | 2078.1041 | 0.01873  | 9.008575 |
| SLYGEKme1FDDENFIL  | SLYGEKF  | 6,K(Mono-met  | 2.16.E-04 | 1830.904  | 0.00218  | 1.190013 |
| VMoxEKme1PSPLLVG   | VMEKPSF  | 2,M(Oxidation | 2.17.E-04 | 3729.9487 | -0.0191  | -5.11936 |
| FHR SVMoxGPKme1GS  | FHR SVM  | 6,M(Oxidation | 2.22.E-04 | 1387.7143 | -0.01099 | -7.91382 |
| EPSSGEEAAPVTAMox   | EPSSGEE  | 14,M(Oxidatio | 2.25.E-04 | 2530.2109 | 0.00047  | 0.185681 |
| FKme1LELQEKme1ETE  | FKLELQE  | 2,K(Mono-met  | 2.27.E-04 | 1619.877  | -0.00147 | -0.90691 |
| Kme1VACIGAWHPAR    | KVACIGAV | 1,K(Mono-met  | 2.44.E-04 | 1378.7292 | 0.00766  | 5.551754 |
| MoxPKme1VMoxKDVVH  | MPKVMKI  | 1,M(Oxidation | 2.48.E-04 | 2353.1592 | 0.00455  | 1.93274  |
| PAKme1STCDSENLAVID | PAKSTCD  | 3,K(Mono-met  | 2.53.E-04 | 2033.0212 | -0.01018 | -5.00487 |
| Kme1FSEWGNNAFFYY   | KFSEWGI  | 1,K(Mono-met  | 2.60.E-04 | 2571.1971 | 0.00213  | 0.828083 |
| SDKme1EFLESVQR     | SDKEFLE  | 3,K(Mono-met  | 2.76.E-04 | 1350.6779 | -0.00977 | -7.22807 |
| ELTIDSIMNKme1VR    | ELTIDSIM | 10,K(Mono-me  | 3.05.E-04 | 1431.7755 | -0.00243 | -1.696   |
| VIDTQQKVKme1LADIQ  | VIDTQQK  | 9,K(Mono-met  | 3.11.E-04 | 2365.3329 | 0.00353  | 1.491753 |
| MoxYGNYSHFMOXKme   | MYGNYSF  | 1,M(Oxidation | 3.15.E-04 | 1322.5424 | -0.00503 | -3.8004  |
| WVNAQFSKme1ATQKRN  | WVNAQFS  | 8,K(Mono-met  | 3.23.E-04 | 2190.1797 | -0.01251 | -5.70927 |
| QKme1KLVLDGDQHQLV  | QKKLVLG  | 2,K(Mono-met  | 3.24.E-04 | 1674.9893 | -0.00507 | -3.02508 |
| FSMPGFKme1GEGPEV   | FSMPGFK  | 7,K(Mono-met  | 3.34.E-04 | 2061.0241 | 0.0005   | 0.242479 |
| NFHKme1VTELHNIK    | NFHKVTE  | 4,K(Mono-met  | 3.37.E-04 | 1492.815  | -0.01347 | -9.01722 |
| VVKme1AAAQVLNNTLW  | VVKAAG   | 3,K(Mono-met  | 3.40.E-04 | 1873.0574 | 0.00549  | 2.929453 |
| RPWEKme1KEATR      | RPWEKKI  | 5,K(Mono-met  | 3.61.E-04 | 1313.7204 | 0.00369  | 2.806657 |
| HCDKme1AFNYSSYLRL  | HCDKAFN  | 2,C(carboxyar | 3.95.E-04 | 1673.762  | -0.00718 | -4.28718 |
| KYINSTLPNDSENIKme  | KYINSTLP | 15,K(Mono-me  | 3.98.E-04 | 2028.064  | -0.00315 | -1.55244 |
| QQLVKVYEKYGYHISK   | QQLVKVY  | 22,C(carboxya | 4.28.E-04 | 3595.8425 | -0.02586 | -7.18968 |
| HWYQQCTKme1ISKGF   | HWYQQC   | 6,C(carboxyar | 4.49.E-04 | 1704.8518 | -0.00355 | -2.08107 |
| Kme1LLNKme1HGKme   | KLLNKHG  | 1,K(Mono-met  | 4.51.E-04 | 1091.7179 | 0.00017  | 0.155574 |
| MLVIKme1Kme1VSKme  | MLVIKKV  | 5,K(Mono-met  | 4.76.E-04 | 1086.7199 | 0.00829  | 7.621338 |
| RALRPCGRPGLPGKme   | RALRPCG  | 6,C(carboxyar | 5.00.E-04 | 1547.8831 | -0.00508 | -3.27978 |
| Kme1NHSIILSAPNPEG  | KNHSIILS | 1,K(Mono-met  | 5.25.E-04 | 1873.0785 | -0.01773 | -9.4607  |
| KLFIGMVSKme1K      | KLFIGMV  | 9,K(Mono-met  | 5.30.E-04 | 1163.71   | 0.00567  | 4.86811  |
| TQSKLLDKme1MoxTTS  | TQSKLLD  | 8,K(Mono-met  | 5.93.E-04 | 1842.955  | 0.00349  | 1.89266  |
| Kme1PFSFHSIDLVLNR  | KPFSFHS  | 1,K(Mono-met  | 6.15.E-04 | 1986.1051 | 0.00382  | 1.922384 |
| Kme1EHTNKme1KPK    | KEHTNKK  | 1,K(Mono-met  | 6.60.E-04 | 1136.6666 | 0.0077   | 6.76815  |

|                    |          |               |           |           |          |          |
|--------------------|----------|---------------|-----------|-----------|----------|----------|
| Kme1AIVKme1EVIDKY  | KAIVKEVI | 1,K(Mono-met  | 6.83.E-04 | 1831.1183 | -0.00426 | -2.32517 |
| MoxKme1SQMELRIKDL  | MKSQMEI  | 1,M(Oxidation | 7.83.E-04 | 1939.0271 | -0.00832 | -4.2886  |
| GILTLKme1YPIEHGIVT | GILTLKYP | 6,K(Mono-met  | 7.85.E-04 | 2585.32   | 0.01706  | 6.596183 |
| YLLTMoxDKme1LWR    | YLLTMDK  | 5,M(Oxidation | 8.05.E-04 | 1367.7271 | 0.01282  | 9.366229 |
| MKme1ELASLHDKHLN   | MKELASL  | 2,K(Mono-met  | 8.11.E-04 | 1704.9094 | -0.0055  | -3.22408 |
| Kme1FVEAMAEYNEAC   | KFVEAMA  | 1,K(Mono-met  | 8.17.E-04 | 2560.2744 | 0.00613  | 2.393327 |
| FFAPWCGHCKme1      | FFAPWCC  | 6,C(carboxyar | 8.89.E-04 | 1322.5689 | 0.00908  | 6.860155 |
| Kme1ISSQGR LAVFTKn | KISSQGR  | 1,K(Mono-met  | 9.28.E-04 | 1461.8668 | -0.00349 | -2.38572 |
| KYYDAKme1TEDKme1   | KYYDAKT  | 6,K(Mono-met  | 9.52.E-04 | 1542.8042 | 0.00401  | 2.597461 |
| SKme1PYAMoxR       | SKPYAMF  | 2,K(Mono-met  | 2.72.E-06 | 881.4429  | 0.00804  | 9.110913 |
| Kme1EKme1PGSEVLT   | KEKPGSE  | 1,K(Mono-met  | 7.29.E-03 | 2338.4087 | 0.00262  | 1.119936 |
| DTDVIMKRKme1       | DTDVIMK  | 9,K(Mono-met  | 8.31.E-05 | 1118.6118 | 0.00471  | 4.20677  |
| LKme1H MVDDKIHSR   | LKHMVDI  | 2,K(Mono-met  | 1.32.E-24 | 1491.798  | -0.00089 | -0.59619 |
| LKme1ANKDSLKYKPILR | LKANKDS  | 2,K(Mono-met  | 4.39.E-20 | 1672.0036 | 0.00046  | 0.274953 |
| KQSGYGGQTKme1PIF   | KQSGYGQ  | 10,K(Mono-me  | 5.26.E-18 | 1579.8471 | 0.00286  | 1.809145 |
| LHNKme1PTFSQTIALL  | LHNKPTF  | 4,K(Mono-met  | 6.38.E-18 | 3496.8175 | 0.02199  | 6.286725 |
| KQSGYGGQTKme1PIF   | KQSGYGQ  | 10,K(Mono-me  | 5.94.E-16 | 1707.942  | 0.00353  | 2.065592 |
| Kme1VLRDNIQGITKPA  | KVLRDNI  | 1,K(Mono-met  | 4.34.E-15 | 1835.1105 | -0.00572 | -3.11528 |
| Kme1SAPATGGVKme1   | KSAPATG  | 1,K(Mono-met  | 9.79.E-13 | 1460.8576 | 0.00015  | 0.102609 |
| MFIGGLSWDTSKme1    | MFIGGLS  | 12,K(Mono-me  | 7.25.E-12 | 1354.6591 | 0.0004   | 0.295058 |
| EITALAPSAMoxKme1   | EITALAPS | 10,M(Oxidatio | 8.28.E-12 | 1160.6111 | -0.00016 | -0.13774 |
| ALAKme1MMGGAGPG    | ALAKMMG  | 4,K(Mono-met  | 3.08.E-11 | 1716.8651 | 0.00877  | 5.105126 |
| Kme1SAPATGGVKme1   | KSAPATG  | 1,K(Mono-met  | 1.61.E-10 | 1474.8732 | -0.00096 | -0.65046 |
| MAAKme1VFESIGKme1  | MAAKVFE  | 4,K(Mono-met  | 1.16.E-09 | 3559.8973 | -0.01786 | -5.01561 |
| AAESPDQKDTDGGPKr   | AAESPDQ  | 15,K(Mono-me  | 1.20.E-09 | 2198.9815 | -0.00221 | -1.00455 |
| YYALCGFGGVLSCGLT   | YYALCGF  | 5,C(carboxyar | 1.37.E-09 | 2923.4976 | -0.00369 | -1.26175 |
| Kme1SAPATGGVK      | KSAPATG  | 1,K(Mono-met  | 1.78.E-09 | 928.53418 | 0.00018  | 0.193644 |
| HTGPGLLSMANS GPNT  | HTGPGLL  | 27,K(Mono-me  | 3.39.E-09 | 2807.3007 | 0.00694  | 2.471233 |
| Kme1SAPSTGGVKme1   | KSAPSTG  | 1,K(Mono-met  | 7.60.E-09 | 1476.8525 | 0.00082  | 0.554856 |
| QSGYGGQTKme1PIFR   | QSGYGGQ  | 9,K(Mono-met  | 1.16.E-08 | 1451.7521 | 0.00521  | 3.586266 |
| SKme1VSSQFDPNKQT   | SKVSSQF  | 2,K(Mono-met  | 1.35.E-08 | 1847.9377 | 0.00239  | 1.292627 |
| AQKme1NAGMETDR     | AQKNAGM  | 3,K(Mono-met  | 1.57.E-08 | 1233.5772 | -0.00698 | -5.65376 |
| SKme1VSSQFDPNKQT   | SKVSSQF  | 2,K(Mono-met  | 1.73.E-08 | 1976.0327 | 0.00176  | 0.890219 |
| LHNKme1PTFSQTIALL  | LHNKPTF  | 4,K(Mono-met  | 2.55.E-08 | 2142.195  | 0.00331  | 1.544416 |
| QSGYGGQTKme1PIFR   | QSGYGGQ  | 9,K(Mono-met  | 4.85.E-08 | 1579.8471 | 0.00071  | 0.449124 |
| MFIGGLSWDTSKme1K   | MFIGGLS  | 12,K(Mono-me  | 2.88.E-07 | 1482.7541 | 0.00775  | 5.223185 |
| CPLLKme1PWALTF SYC | CPLLKPW  | 1,C(carboxyar | 4.00.E-07 | 1821.96   | 0.00312  | 1.711492 |
| GITIDISLWKme1FETTK | GITIDISL | 10,K(Mono-me  | 5.41.E-07 | 1778.9818 | 0.00402  | 2.258436 |
| DKme1NLMLQR        | DKNLMLQ  | 2,K(Mono-met  | 1.02.E-06 | 1030.5593 | 0.00084  | 0.814295 |
| DKme1VRRCSLGIFLPP  | DKVRRCS  | 2,K(Mono-met  | 1.54.E-06 | 1729.9774 | -0.01332 | -7.6951  |
| DILQNVFKme1LEKme1  | DILQNVF  | 8,K(Mono-met  | 9.20.E-06 | 1676.9614 | 0.00047  | 0.280101 |
| APKme1ISMPEVDLNLK  | APKISMP  | 3,K(Mono-met  | 1.25.E-05 | 1581.88   | 0.01357  | 8.572868 |
| EKme1IFLTLENVQSQK  | EKIFLTLE | 2,K(Mono-met  | 2.36.E-05 | 1703.9458 | 0.0043   | 2.522057 |
| AYSNIKDYIDEAEKVAK  | AYSNIKDY | 17,K(Mono-me  | 4.45.E-05 | 2298.1743 | -0.01345 | -5.84994 |
| SEIATDKme1LSFPLKN  | SEIATDKL | 7,K(Mono-met  | 5.29.E-05 | 2074.1786 | 0.00811  | 3.908068 |
| PSLAKme1ALQAGPLK   | PSLAKAL  | 5,K(Mono-met  | 6.32.E-05 | 1448.9079 | 0.01421  | 9.800477 |
| MoxEVKPVGEPTQEVS   | MEVKPVC  | 1,M(Oxidation | 8.13.E-05 | 2405.2876 | -0.00636 | -2.64308 |
| EELERVKMoxEYETLSK  | EELERVK  | 8,M(Oxidation | 9.12.E-05 | 1912.9452 | -0.01905 | -9.95332 |
| DFRIKme1HYAGDVT    | DFRIKHY  | 5,K(Mono-met  | 9.46.E-05 | 1434.7256 | -0.00113 | -0.78706 |



|                    |          |                |           |           |          |          |
|--------------------|----------|----------------|-----------|-----------|----------|----------|
| AFPAWADTSVLSRQQK   | AFPAWAD  | 16,K(Mono-me   | 1.12.E-04 | 1817.9424 | 0.01237  | 6.800582 |
| ATIPEDRIKme1NIRLLK | ATIPEDRI | 9,K(Mono-met   | 1.56.E-04 | 1793.0887 | -0.00174 | -0.96985 |
| AEKme1LSLEEGGKme   | AEKLSLE  | 3,K(Mono-met   | 1.58.E-04 | 2226.2332 | -0.01435 | -6.44299 |
| EHMoxALKme1AVR     | EHMALKA  | 3,M(Oxidation  | 3.58.E-04 | 1083.5859 | 0.00662  | 6.103634 |
| CSVISKme1AVCSRTSF  | CSVISKAV | 1,C(carboxyar  | 3.67.E-04 | 2123.0728 | -0.00345 | -1.62424 |
| VEKme1EMoxGLLSQN   | VEKEMGI  | 3,K(Mono-met   | 5.04.E-04 | 2321.2777 | -0.01849 | -7.96205 |
| MRAAAISTPKLDKMPG   | MRAAAIS  | 24,K(Mono-me   | 8.06.E-04 | 2622.3484 | 0.02505  | 9.548747 |
| AFRLYLQLSQHQKme1   | AFRLYLQ  | 13,K(Mono-me   | 1.17.E-03 | 2312.239  | 0.0095   | 4.106766 |
| Kme1LHVLGLKme1     | KLHVLGL  | 1,K(Mono-met   | 1.21.E-03 | 934.63278 | -0.00461 | -4.92713 |
| GVWIPEGESIKme1IPV  | GVWIPEG  | 11,K(Mono-me   | 1.38.E-03 | 1938.0649 | 0.01172  | 6.044091 |
| LATCSKme1DLSGFSN   | LATCSKD  | 4,C(carboxyar  | 1.52.E-03 | 2829.3239 | 0.01884  | 6.65642  |
| GIGREMoxAYHLAKme1  | GIGREMA  | 6,M(Oxidation  | 2.16.E-03 | 2611.3839 | -0.02085 | -7.98126 |
| MLAPTGAVSTRTRQKG   | MLAPTGA  | 25,K(Mono-me   | 2.42.E-03 | 2593.4738 | -0.02045 | -7.88218 |
| PFYNMKme1PLSEADK   | PFYNMKF  | 6,K(Mono-met   | 3.79.E-03 | 2079.0571 | -0.01348 | -6.48061 |
| MoxTEFGNLALIDQDAG  | MTEFGNL  | 1,M(Oxidation  | 4.93.E-03 | 3716.8138 | 0.01166  | 3.136236 |
| QRTYGSVIPHILPLHVL  | QRTYGSV  | 18,K(Mono-me   | 5.83.E-03 | 2830.6698 | -0.01696 | -5.98942 |
| VKQAMMoxQLYVLKLL   | VKQAMM   | 6,M(Oxidation  | 9.47.E-03 | 2291.3473 | -0.00408 | -1.77983 |
| Kme1LGVNPVWVLIAKr  | KLGVNPV  | 1,K(Mono-met   | 3.09.E-02 | 2567.6295 | -0.01118 | -4.35252 |
| IQEMoxKme1AKme1TT  | IQEMKAK  | 4,M(Oxidation  | 3.85.E-02 | 2771.5255 | -0.00827 | -2.98284 |
| MoxAMoxKEEQVHLEQ   | MAMKEEQ  | 1,M(Oxidation  | 3.98.E-02 | 3453.7596 | -0.00074 | -0.2142  |
| RMoxKANIKme1LVGSG  | RMKANIK  | 2,M(Oxidation  | 1.73.E-01 | 3447.7443 | -0.01632 | -4.73217 |
| Kme2LEDLELKRGLR    | KLEDLEL  | 1,K(Di-methyla | 8.57.E-12 | 1496.9039 | 0.00328  | 2.189711 |
| Kme2HGLEVIYMOxIEPI | KHGLEVI  | 1,K(Di-methyla | 2.43.E-09 | 2748.3866 | -0.01387 | -5.04477 |
| Kme2SRDFHSKLK      | KSRDFHS  | 1,K(Di-methyla | 6.26.E-09 | 1272.7303 | -0.00225 | -1.76646 |
| KMKme2GIHR         | KMKGIHR  | 3,K(Di-methyla | 1.96.E-08 | 896.53782 | -0.00336 | -3.74356 |
| MMoxMKme2MMoxMR    | MMMKMM   | 2,M(Oxidation  | 2.75.E-08 | 1148.4707 | 0.00382  | 3.323237 |
| LKme2AACNLLQR      | LKAACNL  | 2,K(Di-methyla | 2.85.E-08 | 1156.675  | -0.00554 | -4.78545 |
| Kme2RMoxDSRPR      | KRMDSRP  | 1,K(Di-methyla | 3.11.E-08 | 1088.5873 | 0.00529  | 4.854993 |
| EMANMoxKme2EEFEK   | EMANMKI  | 5,M(Oxidation  | 3.50.E-08 | 1685.8005 | -0.01151 | -6.82359 |
| YMKme2SQTI         | YMKSQTI  | 3,K(Di-methyla | 3.95.E-08 | 1166.6482 | 0.01153  | 9.874391 |
| FLKTPGKme2MoxVQDI  | FLKTPGK  | 7,K(Di-methyla | 5.27.E-08 | 1434.7905 | -0.00108 | -0.7522  |
| NQQRILEQNKme2NQK   | NQQRILE  | 10,K(Di-methy  | 6.61.E-08 | 1667.9067 | -0.00995 | -5.962   |
| Kme2IALYELMoxK     | KIALYELM | 1,K(Di-methyla | 1.24.E-07 | 1151.6624 | -0.00325 | -2.81955 |
| GKme2LRNPAGGLSVS   | GKLRNPA  | 2,K(Di-methyla | 1.35.E-07 | 1438.8368 | 0.00808  | 5.611687 |
| VKMoxEKme2EALMTEI  | VKMEKEA  | 3,M(Oxidation  | 1.85.E-07 | 1879.9999 | -0.00623 | -3.31207 |
| Kme2MoxVQIK        | KMVQIK   | 1,K(Di-methyla | 2.58.E-07 | 789.47824 | -0.00298 | -3.76985 |
| YLKme2MoxLKme2EEK  | YLKMLKE  | 3,K(Di-methyla | 3.23.E-07 | 1252.7101 | 0.00027  | 0.215359 |
| HIAKme2PGWKme2NS   | HIAKPGW  | 4,K(Di-methyla | 8.16.E-07 | 1461.8569 | -0.01082 | -7.3965  |
| Kme2YDQLKme2VYLEC  | KYDQLKV  | 1,K(Di-methyla | 8.45.E-07 | 2250.2008 | -0.0071  | -3.15387 |
| GPTSKme2Kme2EPR    | GPTSKKE  | 5,K(Di-methyla | 8.60.E-07 | 1054.6135 | -0.00062 | -0.58733 |
| YQEALDVIRGKme2LGE  | YQEALDV  | 11,K(Di-methy  | 1.03.E-06 | 1745.9676 | -0.00954 | -5.4609  |
| MoxESGFTSKme2DTYL  | MESGFTS  | 1,M(Oxidation  | 1.47.E-06 | 2159.9946 | -0.00973 | -4.50256 |
| SNSVEMDWVLKme2HT   | SNSVEMD  | 11,K(Di-methy  | 1.71.E-06 | 3000.4036 | -0.00766 | -2.55214 |
| KLCLMoxEEAVSEFEP   | KLCLMEE  | 3,C(carboxyar  | 2.22.E-06 | 2210.0963 | 0.00042  | 0.18995  |
| MoxVKme2ALMDNPTLY  | MVKALMD  | 1,M(Oxidation  | 2.64.E-06 | 1808.9416 | 0.01147  | 6.337155 |

|                    |          |                |           |           |          |          |
|--------------------|----------|----------------|-----------|-----------|----------|----------|
| MENDRVQLLKme2EQE   | MENDRVQ  | 10,K(Di-methyl | 3.17.E-06 | 1814.9309 | 0.00409  | 2.252274 |
| MALKIPAKme2R       | MALKIPAK | 8,K(Di-methyl  | 3.33.E-06 | 1054.6685 | -0.00668 | -6.32774 |
| SFRSKme2RSK        | SFRSKRS  | 5,K(Di-methyl  | 3.55.E-06 | 1022.5985 | -0.00979 | -9.56432 |
| TAFDEAIAELDTLSEES  | TAFDEAIA | 19,K(Di-methyl | 4.83.E-06 | 3329.6588 | -0.00843 | -2.53103 |
| MoxVRTDPLWKme2GL   | MVRTDPL  | 1,M(Oxidation  | 5.23.E-06 | 1730.9138 | -0.01372 | -7.9219  |
| Kme2QQEELMKme2AF   | KQQEELN  | 1,K(Di-methyl  | 6.33.E-06 | 2176.1198 | -0.0209  | -9.5999  |
| MDSTEPAYSEKme2R    | MDSTEPA  | 11,K(Di-methyl | 8.30.E-06 | 1440.6555 | 0.00144  | 0.998846 |
| MoxEDEERQKKme2LE   | MEDEERC  | 1,M(Oxidation  | 1.02.E-05 | 1733.8618 | -0.00962 | -5.54512 |
| PDKme2VPRDMoxR     | PDKVPRD  | 3,K(Di-methyl  | 1.27.E-05 | 1156.6023 | 0.01015  | 8.767992 |
| TQLYATVVRKme2SSFI  | TQLYATV  | 10,K(Di-methyl | 1.56.E-05 | 1893.0836 | -0.0166  | -8.76418 |
| LADYLKme2VLIDNK    | LADYLKV  | 6,K(Di-methyl  | 1.67.E-05 | 1431.8337 | 0.01228  | 8.570312 |
| Kme2GFEVIYMOXSEPII | KGFEVIY  | 1,K(Di-methyl  | 1.84.E-05 | 2619.26   | 0.01642  | 6.266497 |
| NSFKme2NNYEK       | NSFKNNY  | 4,K(Di-methyl  | 1.85.E-05 | 1170.5669 | -0.00129 | -1.10108 |
| Kme2HYFEVLMRK      | KHYFEVL  | 1,K(Di-methyl  | 1.87.E-05 | 1377.7591 | 0.00326  | 2.364427 |
| Kme2SLDNEVEKTANLY  | KSLDNEV  | 1,K(Di-methyl  | 1.96.E-05 | 2698.429  | -0.01781 | -6.59772 |
| GLKme2NYQKme2SLID  | GLKNYQK  | 3,K(Di-methyl  | 2.00.E-05 | 1688.9825 | -0.01573 | -9.30784 |
| MoxRLEQDLKme2Kme2  | MRLEQDL  | 1,M(Oxidation  | 2.01.E-05 | 1929.0466 | 0.00674  | 3.492118 |
| NELEARLSSAAEKEAK   | NELEARL  | 16,K(Di-methyl | 2.03.E-05 | 2649.4337 | 0.02062  | 7.779777 |
| MVHKme2HGLEYFYGYII | MVHKHGI  | 4,K(Di-methyl  | 2.31.E-05 | 1748.9072 | -0.01173 | -6.70323 |
| MMSKme2PQTSGAYVLI  | MMSKPQ   | 4,K(Di-methyl  | 2.74.E-05 | 2398.2977 | -0.00047 | -0.19589 |
| FAELVEKme2LGDLLQA  | FAELVEK  | 7,K(Di-methyl  | 2.78.E-05 | 2342.2482 | -0.01872 | -7.98895 |
| IKme2APTPTCFDEAQQ  | IKAPTPTC | 2,K(Di-methyl  | 2.78.E-05 | 2610.3437 | 0.00489  | 1.87259  |
| TCRkme2AFGHYDNLK   | TCRKAFG  | 2,C(carboxyar  | 4.21.E-05 | 1636.8144 | 0.01287  | 7.857937 |
| Kme2LCFLLQADR      | KLCFLLQ  | 1,K(Di-methyl  | 4.46.E-05 | 1290.7118 | 0.00777  | 6.015204 |
| PIADGGSDISGYFLEKnr | PIADGGS  | 16,K(Di-methyl | 4.47.E-05 | 2251.1848 | 0.00989  | 4.391258 |
| HLLYAVTKme2LPQITE  | HLLYAVT  | 8,K(Di-methyl  | 4.51.E-05 | 2238.2922 | -0.01357 | -6.05997 |
| LYRTFKme2DNK       | LYRTFKD  | 6,K(Di-methyl  | 5.25.E-05 | 1211.6662 | 0.00209  | 1.723462 |
| RHLKme2MoxMoxHIAA  | RHLKMMH  | 4,K(Di-methyl  | 5.46.E-05 | 1878.0444 | -0.00107 | -0.56944 |
| NKQVKme2QAFKme2S   | NKQVKQA  | 5,K(Di-methyl  | 6.86.E-05 | 1718.9866 | -0.0124  | -7.20938 |
| Kme2FKme2SLMELVEY  | KFKSLME  | 1,K(Di-methyl  | 6.89.E-05 | 1732.9474 | 0.0025   | 1.441789 |
| RLMQTDKlkme2QLR    | RLMQTDK  | 9,K(Di-methyl  | 7.48.E-05 | 1556.9185 | -0.00584 | -3.74859 |
| SNEKme2QELQELNDR   | SNEKQEL  | 4,K(Di-methyl  | 9.24.E-05 | 1629.7958 | 0.00834  | 5.114019 |
| FCFKme2VFDVDRDGV   | FCFKVFD  | 2,C(carboxyar  | 1.13.E-04 | 2484.2947 | 0.0088   | 3.540805 |
| TAVVTGANSIGKme2I   | TAVVTGA  | 13,K(Di-methyl | 1.30.E-04 | 2087.1409 | -0.00828 | -3.96525 |
| ISKme2FRCVWIEKESIN | ISKFRCV  | 3,K(Di-methyl  | 1.32.E-04 | 3496.8137 | 0.0099   | 2.830326 |
| YKNYSYLHCEWATEEC   | YKNYSYL  | 19,K(Di-methyl | 1.68.E-04 | 2688.2894 | 0.01161  | 4.317095 |
| RYNESKme2KPFsfHS   | RYNESKK  | 6,K(Di-methyl  | 2.05.E-04 | 2364.2339 | -0.02246 | -9.49595 |
| Kme2MVKme2EKme2E   | KMVKEKE  | 1,K(Di-methyl  | 2.24.E-04 | 1571.9069 | -0.00619 | -3.93539 |
| TMoxLLWVFLQLNYKme  | TMLLWVF  | 2,M(Oxidation  | 2.71.E-04 | 3497.8383 | -0.01456 | -4.16139 |
| IHTGEKPYVCPECgKme  | IHTGEKP  | 15,K(Di-methyl | 2.79.E-04 | 3260.6488 | -0.00587 | -1.7997  |
| PLGLKme2PTCSVCKT   | PLGLKPT  | 5,K(Di-methyl  | 2.86.E-04 | 2353.2208 | 0.00605  | 2.569838 |
| Kme2RRQHSHSYSSDE   | KRRQHSH  | 1,K(Di-methyl  | 2.87.E-04 | 2114.0365 | -0.00418 | -1.97632 |
| VKme2EKme2FQQLRH   | VKEKFQC  | 2,K(Di-methyl  | 3.18.E-04 | 1523.9049 | -0.00892 | -5.84955 |

|                     |           |                |           |           |          |          |
|---------------------|-----------|----------------|-----------|-----------|----------|----------|
| KMoxVEQLKme2IEASL   | KMVEQLK   | 2,M(Oxidation  | 3.28.E-04 | 1989.1115 | 0.01653  | 8.305968 |
| QELCNDVLA MoxKme2   | QELCNDV   | 4,C(carboxyar  | 3.51.E-04 | 1519.7487 | -0.0087  | -5.72087 |
| QFQALPGPPALRCKme    | QFQALPG   | 13,C(carboxya  | 4.07.E-04 | 2869.4691 | 0.00267  | 0.930158 |
| LAWQAEKme2EQVIRY    | LAWQAEK   | 7,K(Di-methyla | 4.81.E-04 | 1917.0472 | 0.01559  | 8.127962 |
| KSRLEQVAFKme2EHA    | KSRLEQV   | 10,K(Di-methyl | 6.15.E-04 | 2364.339  | -0.00688 | -2.90867 |
| LDKme2MoxPGMFFSA    | LDKMPGN   | 3,K(Di-methyla | 6.49.E-04 | 1996.0162 | 0.00183  | 0.916363 |
| GSFKme2YAWVLDK LK   | GSFKYAV   | 4,K(Di-methyla | 1.06.E-21 | 1581.8919 | 0.00088  | 0.555942 |
| QLIVGVNKMDSTEPPEY   | QLIVGVN   | 19,K(Di-methyl | 3.65.E-19 | 2317.21   | 0        | 0        |
| GSFKme2YAWVLDK      | GSFKYAV   | 4,K(Di-methyla | 9.67.E-14 | 1340.7129 | -0.00098 | -0.73041 |
| QLIVGVNK MoxDSTEPPE | QLIVGVN   | 9,M(Oxidation  | 4.49.E-10 | 2333.2049 | 0.00508  | 2.176318 |
| QLIVGVNKMDSTEPAY    | QLIVGVN   | 19,K(Di-methyl | 3.69.E-09 | 2292.1784 | 0.0059   | 2.572833 |
| ADLEMQIESLKme2EEL   | ADLEMQI   | 11,K(Di-methyl | 5.37.E-09 | 2150.1181 | -0.00302 | -1.40392 |
| MoxDSTEPPEYSQKme2   | MDSTEPPE  | 1,M(Oxidation  | 9.13.E-09 | 1481.682  | 0.00214  | 1.443321 |
| MDSTEPPEYSQKme2R    | MDSTEPPE  | 11,K(Di-methyl | 9.29.E-08 | 1465.6871 | 0.00156  | 1.063615 |
| MoxDSTEPPEYSEKme2   | MDSTEPPE  | 1,M(Oxidation  | 1.30.E-07 | 1456.6504 | 0.00232  | 1.591592 |
| EKme2TCNDY MoxKR    | EKTCNDY   | 2,K(Di-methyla | 2.49.E-07 | 1387.6224 | 0.00889  | 6.401954 |
| GKme2EGSDANPFLSK    | GKEGSDA   | 2,K(Di-methyla | 5.07.E-07 | 1376.6936 | -0.00171 | -1.2412  |
| GITIDISLWKme2FETTK  | GITIDISLV | 10,K(Di-methyl | 2.65.E-06 | 1778.9818 | 0.00238  | 1.337085 |
| EKme2HLMEK          | EKHLMEK   | 2,K(Di-methyla | 2.84.E-06 | 941.50043 | 0.00107  | 1.135268 |
| EEIINCAQ GKme2K     | EEIINCAQ  | 6,C(carboxyar  | 1.65.E-05 | 1316.6758 | 0.00876  | 6.647988 |
| DKme2CEPVFLFSVMM    | DKCEPVFL  | 2,K(Di-methyla | 1.67.E-05 | 2276.1481 | 0.00663  | 2.911519 |
| SGSQPNKme2VIDK      | SGSQPN    | 8,K(Di-methyla | 1.95.E-05 | 1327.7096 | -0.00966 | -7.27023 |
| DMMKKme2EITKme2E    | DMMKKEI   | 5,K(Di-methyla | 2.41.E-05 | 1463.784  | -0.00237 | -1.61798 |
| QRTYGSVIPHILPLHVL   | QRTYGSV   | 19,K(Di-methyl | 2.42.E-05 | 2830.6698 | -0.01565 | -5.52679 |
| EIKme2EIPSCEREKTS   | EIKEIPSC  | 3,K(Di-methyla | 3.17.E-05 | 1990.0041 | 0.00421  | 2.114499 |
| Kme2SAPATGGVKme2    | KSAPATG   | 1,K(Di-methyla | 6.97.E-05 | 1488.8889 | 0.00048  | 0.32217  |
| GITIDISLWKme2FETSK  | GITIDISLV | 10,K(Di-methyl | 2.20.E-04 | 1764.9662 | 0.00442  | 2.502863 |
| DSNLKme2LTLAFGIGM   | DSNLKLT   | 5,K(Di-methyla | 2.88.E-04 | 2715.4027 | 0.01419  | 5.223779 |
| DSLLNIARGKKme2HGB   | DSLLNIAF  | 11,K(Di-methyl | 4.73.E-04 | 1692.9635 | 0.0157   | 9.268079 |
| Kme2VLRDNIQGITKPA   | KVLRDNIQ  | 1,K(Di-methyla | 1.40.E-03 | 1849.1262 | -0.00058 | -0.31349 |
| QKme2SSEAPVQSPQF    | QKSSEAP   | 2,K(Di-methyla | 2.67.E-03 | 3719.718  | -0.00571 | -1.53465 |
| QDHPLPGKme2GASLD    | QDHPLPG   | 8,K(Di-methyla | 1.74.E-02 | 3465.6008 | 0.0286   | 8.250071 |
| Kme3MFPGLAAPS LPK   | KMFPGLA   | 1,K(Tri-methyl | 1.90.E-17 | 1397.8105 | 0.00118  | 0.843569 |
| Kme3LEEMoxHQR       | KLEEMHG   | 1,K(Tri-methyl | 6.44.E-15 | 1127.5757 | -0.00438 | -3.88099 |
| Kme3QEMoxKKR        | KQEMKKR   | 1,K(Tri-methyl | 8.43.E-15 | 1004.5801 | 0.00204  | 2.028661 |
| Kme3IQNQWK          | KIQNQWK   | 1,K(Tri-methyl | 3.11.E-10 | 985.5709  | 0.00812  | 8.2304   |
| Kme3QERDR           | KQERDR    | 1,K(Tri-methyl | 6.04.E-09 | 872.48281 | 0.00425  | 4.865515 |
| Kme3DFMoxER         | KDFMER    | 1,K(Tri-methyl | 6.60.E-09 | 882.42693 | 0.00321  | 3.633534 |
| HQKKme3ANTNTDLR     | HQKKANT   | 4,K(Tri-methyl | 1.15.E-08 | 1466.7954 | -0.00979 | -6.66988 |
| Kme3QMoxEELQALKV    | KQMEELQ   | 1,K(Tri-methyl | 1.25.E-08 | 1501.8538 | -0.00627 | -4.17206 |
| IKme3VPNYS PSR      | IKVPNYS   | 2,K(Tri-methyl | 1.36.E-08 | 1201.6819 | 0.00046  | 0.382476 |
| MGKme3EEEEKme3LMo   | MGKEEEE   | 3,K(Tri-methyl | 2.26.E-08 | 1462.7888 | -0.0028  | -1.91284 |
| MoxLTINPSKme3R      | MLTINPS   | 1,M(Oxidation  | 3.60.E-08 | 1116.6325 | 0.00934  | 8.356827 |

|                    |           |                |           |           |          |          |
|--------------------|-----------|----------------|-----------|-----------|----------|----------|
| NKme3TLQMEKIKme3A  | NKTLQME   | 2,K(Tri-methyl | 6.36.E-08 | 1542.928  | 0.00271  | 1.755252 |
| Kme3MKme3LMoxR     | KMKLMR    | 1,K(Tri-methyl | 7.03.E-08 | 905.55545 | -0.00049 | -0.5405  |
| QCRAEYDTKme3EVK    | QCRAEYD   | 2,C(carboxyar  | 8.36.E-08 | 1567.7664 | -0.01407 | -8.96887 |
| Kme3TTVSMR         | KTTVSMR   | 1,K(Tri-methyl | 2.44.E-07 | 960.54263 | -0.00403 | -4.19117 |
| WKme3Kme3LTNAQR    | WKKLTNA   | 2,K(Tri-methyl | 2.47.E-07 | 1227.7452 | 0        | 0        |
| WCMAGKCITVGKme3K   | WCMAGK    | 2,C(carboxyar  | 2.65.E-07 | 1579.8037 | -0.01328 | -8.40082 |
| MSLWVDKme3YRPCSL   | MSLWVD    | 7,K(Tri-methyl | 5.80.E-07 | 1908.9702 | 0.01143  | 5.984328 |
| FLKme3DPQWKNLK     | FLKDPQW   | 3,K(Tri-methyl | 8.85.E-07 | 1457.8395 | 0.00013  | 0.089111 |
| Kme3MFPGLAAPSLPK   | KMFPGLA   | 1,K(Tri-methyl | 1.17.E-06 | 1525.9054 | 0.00125  | 0.818645 |
| Kme3YNPTWHCIVGR    | KYNPTWH   | 1,K(Tri-methyl | 1.47.E-06 | 1571.8031 | 0.0087   | 5.531469 |
| MTQKme3PHK         | MTQKPHK   | 4,K(Tri-methyl | 3.30.E-06 | 910.50585 | -0.00273 | -2.99503 |
| MoxLDQRIKme3MK     | MLDQRIK   | 1,M(Oxidation  | 3.99.E-06 | 1219.6781 | -0.01162 | -9.51933 |
| NLMNSLEQKme3IR     | NLMNSLE   | 9,K(Tri-methyl | 4.97.E-06 | 1386.7653 | -0.01033 | -7.44364 |
| WICRKme3R          | WICRKR    | 3,C(carboxyar  | 5.11.E-06 | 959.54872 | 0.00922  | 9.598515 |
| Kme3KMoxYSR        | KKMYSR    | 1,K(Tri-methyl | 5.37.E-06 | 869.47929 | 0.00781  | 8.971913 |
| WFQLEDLIKme3R      | WFQLEDL   | 9,K(Tri-methyl | 7.97.E-06 | 1388.7816 | 0.01289  | 9.274704 |
| MKme3DSVPQGVISLK   | MKDSVPC   | 2,K(Tri-methyl | 8.32.E-06 | 1699.9542 | 0.01194  | 7.01951  |
| Kme3LLEEDVKRWK     | KLLEEDV   | 1,K(Tri-methyl | 8.68.E-06 | 1484.8715 | -0.01218 | -8.19724 |
| KLDKme3EDKme3VR    | KLDKEDK   | 4,K(Tri-methyl | 9.95.E-06 | 1213.7394 | -0.00974 | -8.0182  |
| ENVPPKNLAKme3AMo   | ENVPPKN   | 10,K(Tri-methy | 1.13.E-05 | 2481.4141 | -0.01183 | -4.76553 |
| KWCSLTKme3NFNKDF   | KWCSLTK   | 3,C(carboxyar  | 1.19.E-05 | 1737.8985 | -0.01089 | -6.2626  |
| ELKme3ASHPIPEDK    | ELKASHP   | 3,K(Tri-methyl | 1.55.E-05 | 1404.7613 | -0.00011 | -0.07825 |
| ICKme3TLKEEFQQDM   | ICKLTLKE  | 2,C(carboxyar  | 1.86.E-05 | 2239.1453 | 0.00752  | 3.356903 |
| VTKVEHKSQKme3ER    | VTKVEHK   | 11,K(Tri-methy | 2.49.E-05 | 1623.9057 | -0.00123 | -0.75696 |
| MoxLKme3EEILNLKTHI | MLKEEILN  | 1,M(Oxidation  | 2.80.E-05 | 2170.1238 | 0.00606  | 2.791164 |
| QLWSSKme3ISLKme3E  | QLWSSKI   | 6,K(Tri-methyl | 3.17.E-05 | 1529.9181 | 0.00902  | 5.891827 |
| GKFNLQLPSLDEQVIPA  | GKFNLQL   | 21,K(Tri-methy | 3.25.E-05 | 2889.644  | 0.006    | 2.075652 |
| VQPVKme3DTAHDFFR   | VQPVKDT   | 5,K(Tri-methyl | 4.05.E-05 | 1453.7678 | -0.00175 | -1.20294 |
| Kme3RLEDDKR        | KRLEDDK   | 1,K(Tri-methyl | 7.02.E-05 | 1100.6302 | 0.00867  | 7.870041 |
| NHTGEKPYKme3CNKC   | NHTGEKF   | 9,K(Tri-methyl | 7.76.E-05 | 1861.8927 | -0.00581 | -3.1188  |
| TKEEVEAAKAAALLAKr  | TKEEVEA   | 16,K(Tri-methy | 7.76.E-05 | 2515.3567 | 0.01893  | 7.522702 |
| Kme3AIPINNKSF      | KAIPINNK  | 1,K(Tri-methyl | 8.32.E-05 | 1172.6917 | 0.01154  | 9.832066 |
| NYPVMoxKme3RKIIR   | NYPVMKF   | 5,M(Oxidation  | 1.30.E-04 | 1474.8806 | 0.00061  | 0.41331  |
| Kme3DLALWTVQR      | KDLALWT   | 1,K(Tri-methyl | 1.32.E-04 | 1270.7398 | 0.01244  | 9.781724 |
| SRKme3RPCEQEVGTC   | SRKRPC    | 3,K(Tri-methyl | 1.39.E-04 | 3532.6827 | 0.02417  | 6.839829 |
| IVLKme3ELEDSELLAR  | IVLKELED  | 4,K(Tri-methyl | 1.48.E-04 | 1539.9236 | 0.01404  | 9.111293 |
| VLRVPNPSSKme3RNE   | VLRVPNP   | 10,K(Tri-methy | 1.87.E-04 | 1821.0333 | 0.01455  | 7.985488 |
| KIILEFKEKme3CK     | KIILEFKEI | 9,K(Tri-methyl | 1.89.E-04 | 1476.8738 | -0.00595 | -4.02605 |
| VLSENPMACKme3EILK  | VLSENPM   | 9,C(carboxyar  | 2.04.E-04 | 1672.8892 | -0.00086 | -0.51377 |
| VLELEPSMQKme3AVR   | VLELEPS   | 10,K(Tri-methy | 2.05.E-04 | 1696.9658 | 0.01669  | 9.82927  |
| FPVHPRKme3AVGSLA   | FPVHPRK   | 7,K(Tri-methyl | 2.46.E-04 | 2043.1742 | 0.01971  | 9.641908 |
| Kme3NFYQEHPLARR    | KNFYQEH   | 1,K(Tri-methyl | 2.46.E-04 | 1714.8903 | 0.01706  | 9.942219 |
| MNTGEKme3TTMRDLS   | MNTGEKT   | 6,K(Tri-methyl | 2.87.E-04 | 2041.0006 | 0.01769  | 8.662967 |

|                    |           |                |           |           |          |          |
|--------------------|-----------|----------------|-----------|-----------|----------|----------|
| GDAWVYKme3RLVEDI   | GDAWVY    | 7,K(Tri-methyl | 3.00.E-04 | 2321.2453 | -0.01948 | -8.38848 |
| TCNQDLNECGLKme3P   | TCNQDLN   | 2,C(carboxyar  | 5.23.E-04 | 1745.8189 | -0.01465 | -8.38671 |
| GVLTLKme3YPIEHGVV  | GVLTLKY   | 6,K(Tri-methyl | 5.25.E-04 | 2601.3149 | 0.00299  | 1.148972 |
| ESTGTSGPLQRPQLSK   | ESTGTSG   | 16,K(Tri-methy | 5.50.E-04 | 2110.1859 | 0.01104  | 5.229243 |
| TYYRSKWYIDYAVSVK   | TYYRSKW   | 16,K(Tri-methy | 5.54.E-04 | 2326.211  | 0.01605  | 6.896598 |
| KKme3IKme3PTLPLR   | KKIKPTLF  | 2,K(Tri-methyl | 8.17.E-04 | 1276.8959 | 0.00216  | 1.690266 |
| GITIDISLWKme3FETSK | GITIDISLV | 10,K(Tri-methy | 2.14.E-22 | 1778.9818 | 0.00117  | 0.657307 |
| GSFKme3YGWVLDK     | GSFKYGV   | 4,K(Tri-methyl | 2.47.E-15 | 1340.7129 | 0.00054  | 0.402468 |
| Kme3MoxFPGLAAPSLF  | KMFPGLA   | 1,K(Tri-methyl | 3.82.E-15 | 1413.8054 | 0.00684  | 4.834539 |
| AQQAADKme3YLYVDK   | AQQAADK   | 7,K(Tri-methyl | 7.93.E-14 | 3335.7302 | -0.03327 | -9.97092 |
| Kme3VLRDNIQGITKPA  | KVLRDNIQ  | 1,K(Tri-methyl | 1.88.E-13 | 1863.1418 | -0.00091 | -0.48816 |
| QYKme3GIIDCVVRIPK  | QYKGIIDC  | 3,K(Tri-methyl | 4.52.E-12 | 1729.9913 | 0.00265  | 1.530906 |
| QYKme3GIVDCIVRIPK  | QYKGIVD   | 3,K(Tri-methyl | 1.86.E-11 | 1729.9913 | 0.00217  | 1.25361  |
| DICEGYLKme3QCRK    | DICEGYLI  | 3,C(carboxyar  | 4.95.E-11 | 1610.7909 | 0.00228  | 1.414567 |
| Kme3SAPATGGVKKPH   | KSAPATG   | 1,K(Tri-methyl | 1.12.E-10 | 1474.8732 | -0.00443 | -3.00161 |
| Kme3SAPATGGVK      | KSAPATG   | 1,K(Tri-methyl | 1.16.E-10 | 956.56548 | -0.00104 | -1.08608 |
| Kme3MoxFPGLAAPSLF  | KMFPGLA   | 1,K(Tri-methyl | 6.10.E-10 | 1541.9004 | 0.00378  | 2.449914 |
| QYKme3GIIDCVVR     | QYKGIIDC  | 3,K(Tri-methyl | 1.52.E-09 | 1391.7595 | 0.00009  | 0.06462  |
| SKme3RPSYAPPPTPA   | SKRPSYA   | 2,K(Tri-methyl | 5.95.E-09 | 4336.1164 | -0.03526 | -8.12988 |
| Kme3SAPSTGGVK      | KSAPSTG   | 1,K(Tri-methyl | 9.70.E-09 | 972.56039 | -0.00149 | -1.53046 |
| SKme3PHSEAGTAFIQ   | SKPHSEA   | 2,K(Tri-methyl | 3.48.E-08 | 4749.3102 | -0.03845 | -8.09426 |
| QYKme3GIVDCIVR     | QYKGIVD   | 3,K(Tri-methyl | 1.99.E-07 | 1391.7595 | -0.00013 | -0.09334 |
| AEKENNDKme3IQR     | AEKENND   | 8,K(Tri-methyl | 7.03.E-07 | 1385.7263 | 0.00791  | 5.704019 |
| EDGSIIKme3R        | EDGSIIK   | 7,K(Tri-methyl | 9.76.E-07 | 958.54474 | -0.00018 | -0.18759 |
| ALVIGKme3DHESKNSC  | ALVIGKDI  | 6,K(Tri-methyl | 1.82.E-06 | 2312.2488 | -0.00271 | -1.17151 |
| Kme3STSFRPGSVGSG   | KSTSFRP   | 1,K(Tri-methyl | 2.43.E-06 | 3872.9405 | -0.00657 | -1.69595 |
| GSFKme3YGWVLDK     | GSFKYGV   | 4,K(Tri-methyl | 3.30.E-06 | 1581.8919 | -0.0028  | -1.76891 |
| DDKDTIEKLKme3EK    | DDKDTIEI  | 10,K(Tri-methy | 3.68.E-06 | 1502.8192 | -0.0017  | -1.13045 |
| EFPNFDKme3QELR     | EFPNFDK   | 7,K(Tri-methyl | 4.61.E-06 | 1463.7409 | -0.01347 | -9.19621 |
| EGENFKme3ALYR      | EGENFKA   | 6,K(Tri-methyl | 5.80.E-06 | 1267.6561 | -0.00611 | -4.81612 |
| AFKDTGKme3TPVEPE   | AFKDTGK   | 7,K(Tri-methyl | 7.39.E-06 | 2036.1055 | -0.01946 | -9.55283 |
| GSRGTTMoxVKKme3R   | GSRGTTM   | 7,M(Oxidation  | 1.90.E-05 | 1277.7238 | 0.0125   | 9.77522  |
| GKme3QATGEEKme3A   | GKQATGE   | 2,K(Tri-methyl | 2.08.E-05 | 3719.7367 | -0.0278  | -7.47168 |
| SKme3PHSEAGTAFIQ   | SKPHSEA   | 2,K(Tri-methyl | 3.49.E-05 | 4749.3102 | -0.02658 | -5.59545 |
| Kme3SAPATGGVKKme   | KSAPATG   | 1,K(Tri-methyl | 6.88.E-05 | 1516.9202 | 0.00462  | 3.043614 |
| SKme3PHSEAGTAFIQ   | SKPHSEA   | 2,K(Tri-methyl | 8.46.E-05 | 3554.6857 | -0.0288  | -8.09975 |
| SGSQQPnkme3VIDK    | SGSQQP    | 8,K(Tri-methyl | 8.79.E-05 | 1341.7252 | -0.01079 | -8.03592 |
| EKme3ADMoxKHLR     | EKADMKH   | 2,K(Tri-methyl | 1.46.E-04 | 1184.6336 | 0.01025  | 8.645039 |
| AESEEMETSQAGSKme   | AESEEME   | 14,K(Tri-methy | 2.47.E-04 | 2833.3474 | -0.02005 | -7.07397 |
| Kme3IMoxHTDAMIIDM  | KIMHTDA   | 1,K(Tri-methyl | 5.17.E-04 | 1647.8146 | -0.00427 | -2.58974 |
| HGLHLEMLMAVALPK    | HGLHLEM   | 23,K(Tri-methy | 1.08.E-03 | 3087.7064 | -0.01292 | -4.18299 |
| HHVPQQCNKme3MoxF   | HHVPQQ    | 7,C(carboxyar  | 1.11.E-03 | 2595.3778 | -0.01823 | -7.02135 |
| ARKme3SWRDEASVQL   | ARKSWRI   | 3,K(Tri-methyl | 6.81.E-03 | 2354.2819 | -0.00858 | -3.64288 |

|                     |          |                 |            |           |          |          |
|---------------------|----------|-----------------|------------|-----------|----------|----------|
| AERQRFSEEVEMoxLK    | AERQRFS  | 12,M(oxidation) | 6.72E-09   | 1788.9222 | -0.00999 | -5.58126 |
| AFTLNETLKme1IHER    | AFTLNET  | 9,K(Mono-met    | 0.00000687 | 1588.8846 | -0.00162 | -1.01894 |
| CLKme1VGMRRREAVQF   | CLKVGMF  | 1,C(Carbamid    | 0.00000303 | 1623.9119 | -0.00812 | -4.9972  |
| DKMoxHNIMoxLLPEPK   | DKMHNIM  | 3,M(oxidation)  | 0.000541   | 1622.8826 | -0.01332 | -8.20259 |
| DQLNEMKEFKme1       | DQLNEMF  | 10,K(Mono-me    | 0.000018   | 1302.6583 | 0.0053   | 4.065443 |
| DSCPAVSKme1ILER     | DSCPAVS  | 3,C(Carbamid    | 0.000204   | 1391.7351 | 0.01387  | 9.95867  |
| EMIETKVVKEEKANDSI   | EMIETKV  | 23,K(Mono-me    | 0.0000199  | 2669.3159 | -0.01217 | -4.55752 |
| ERQDNPKme1LDSMox    | ERQDNPK  | 7,K(Mono-met    | 2.37E-11   | 1525.77   | 0.01023  | 6.700343 |
| ERQDNPKme1LDSMR     | ERQDNPK  | 7,K(Mono-met    | 4.73E-10   | 1509.7663 | 0.00217  | 1.436348 |
| EVSELRSELWEKme1E    | EVSELR   | 12,K(Mono-me    | 0.0000186  | 2530.3679 | -0.01214 | -4.79584 |
| FCKVMVDNIPKme1      | FCKVMVD  | 2,C(Carbamid    | 5.98E-08   | 1371.7348 | -0.01065 | -7.75826 |
| GITALQADIKLPGIPIKme | GITALQAI | 17,K(Mono-me    | 0.00433    | 3265.9505 | 0.03161  | 9.675575 |
| GLNALVQLSVVVGPSL    | GLNALVG  | 33,K(Mono-me    | 0.00439    | 3673.1687 | 0.02841  | 7.732286 |
| GWDEALLTMSKGEKme    | GWDEALI  | 14,K(Mono-me    | 0.0000918  | 1812.9498 | 0.0121   | 6.670455 |
| HKme1DYDYLFRSQK     | HKDYDYL  | 2,K(Mono-met    | 0.00000188 | 1731.8489 | -0.00618 | -3.56638 |
| HQGVMOxVGMGQKme     | HQGVMOV  | 5,M(oxidation)  | 3.49E-07   | 2392.1365 | -0.00843 | -3.52258 |
| HQGVMOxVGMGQKme1D   | HQGVMOV  | 11,K(Mono-me    | 3.03E-07   | 2532.234  | -0.00255 | -1.00662 |
| Kme1Kme1MoxRAEDG    | KKMRAED  | 1,K(Mono-met    | 0.00000224 | 1659.8916 | -0.00929 | -5.59339 |
| Kme1LDLPVLPNRLGK    | KLDLPVL  | 1,K(Mono-met    | 0.000201   | 2518.5739 | -0.01297 | -5.14771 |
| Kme1LPELR           | KLPELR   | 1,K(Mono-met    | 2.04E-07   | 772.50796 | -0.00112 | -1.44794 |
| Kme1NITEYCRDLIK     | KNITEYCR | 1,K(Mono-met    | 5.21E-07   | 1569.8457 | -0.00862 | -5.48749 |
| Kme1SAPATGGVKme1    | KSAPATG  | 1,K(Mono-met    | 5.34E-18   | 1468.902  | 0.00072  | 0.489826 |
| Kme1SAPSTGGVKme1    | KSAPSTG  | 1,K(Mono-met    | 3.68E-09   | 1484.8969 | -0.00179 | -1.20466 |
| KHTLPLVSVHWQKme1    | KHTLPLV  | 13,K(Mono-me    | 0.000508   | 1589.9315 | 0.0041   | 2.577088 |
| KQSGYGGQTKme1PIF    | KQSGYGG  | 10,K(Mono-me    | 4.95E-20   | 1583.8693 | -0.00101 | -0.63727 |
| KTKme1AAAAAAAAAAP   | KTAAAAA  | 1,K(Mono-met    | 4.14E-16   | 2742.4785 | -0.01037 | -3.77988 |
| LKme1ADKme1EFR      | LKADKEF  | 2,K(Mono-met    | 4.03E-07   | 1041.6364 | -0.00756 | -7.25085 |
| LKme1HMVDDKIHSR     | LKHMVDD  | 2,K(Mono-met    | 4.39E-07   | 1499.8336 | 0.00887  | 5.909985 |
| LKme1HMVLDKMoxHA    | LKHMVLD  | 2,K(Mono-met    | 5.5E-08    | 1519.8694 | 0.00954  | 6.272659 |
| LTTYPQTTIRKme1      | LTTYPQT  | 11,K(Mono-me    | 0.00000288 | 1338.778  | -0.01174 | -8.76268 |
| MoxLADWTKYRSTKme    | MLADWTK  | 1,M(oxidation)  | 0.00000102 | 1536.8152 | -0.00712 | -4.62995 |
| MoxMoxTYIEKme1R     | MMTYIEK  | 1,M(oxidation)  | 0.00000209 | 1128.5973 | 0.00994  | 8.799462 |
| MoxSILGVRSGIEDKme   | MSILGVR  | 1,M(oxidation)  | 0.0000341  | 1588.8676 | 0.00765  | 4.811676 |
| MDSQTVGKme1SSKme    | MDSQTVG  | 8,K(Mono-met    | 9.62E-09   | 1206.6492 | -0.00298 | -2.4676  |
| NGITNLLMYVKSMKme    | NGITNLL  | 14,K(Mono-me    | 0.0000177  | 1636.9171 | -0.00844 | -5.15289 |
| QEHKme1LKme1VARL    | QEHKLV   | 4,K(Mono-met    | 0.000253   | 2116.2662 | 0.00736  | 3.476157 |
| QLFSSQLKme1NLHPG    | QLFSSQL  | 8,K(Mono-met    | 0.0000121  | 1843.0225 | -0.01803 | -9.7776  |
| QSGYGGQTKme1PIFR    | QSGYGG   | 9,K(Mono-met    | 8.88E-14   | 1455.7743 | -0.00245 | -1.68179 |
| QSGYGGQTKme1PIFR    | QSGYGG   | 9,K(Mono-met    | 8.04E-08   | 1583.8693 | -0.00241 | -1.52063 |
| SKLPSGKme1NILVFG    | SKLPSGK  | 7,K(Mono-met    | 0.000302   | 1950.0695 | 0.00079  | 0.404904 |
| SMoxLQPQDIETEKme1   | SMLQPQD  | 2,M(oxidation)  | 0.0000142  | 1455.7308 | -0.00879 | -6.03407 |
| TFELFRGKme1         | TFELFRG  | 8,K(Mono-met    | 1.16E-07   | 1014.5771 | -0.00068 | -0.66957 |
| TKme1AAAAAAAAAAPA   | TKAAAAA  | 2,K(Mono-met    | 1.29E-13   | 2614.3835 | -0.00622 | -2.37824 |

|                      |           |                |            |           |          |          |
|----------------------|-----------|----------------|------------|-----------|----------|----------|
| TPSSDVLVFDYTKHPA     | TPSSDVL   | 17,K(Mono-me   | 9.61E-07   | 3259.5728 | -0.03233 | -9.91551 |
| TQIKKLC\$SWRDKme1    | TQIKKLC\$ | 7,C(Carbamid   | 2.65E-07   | 1579.8777 | -0.00867 | -5.4843  |
| TSACFEP\$LDYMTKme    | TSACFEP\$ | 4,C(Carbamid   | 0.0000639  | 2136.0689 | -0.00959 | -4.48746 |
| TSVVLNH\$LAEKme1WF   | TSVVLNH\$ | 11,K(Mono-me   | 0.000412   | 1999.0912 | -0.01655 | -8.27466 |
| VSHKST\$SGQAKWQGH    | VSHKST\$  | 22,C(Carbami   | 7.17E-07   | 2786.4307 | 0.00797  | 2.859248 |
| VYRAVTDY\$VTVTMoxG   | VYRAVTD   | 13,M(oxidator  | 0.0000654  | 1868.9735 | -0.00062 | -0.33155 |
| YDEELG\$KAARFSCDIE   | YDEELGK   | 13,C(Carbami   | 0.000431   | 2289.122  | 0.0191   | 8.340071 |
| YLAATPL\$QRKme1PHG   | YLAATPL   | 10,K(Mono-me   | 0.00297    | 2352.4067 | -0.00218 | -0.92632 |
| YNQRQKme1NKNHEQ\$    | YNQRQK    | 6,K(Mono-met   | 0.0000282  | 1846.9419 | 0.00575  | 3.111548 |
| AMoxKIDHLSIEKme2LL   | AMKIDHL   | 2,M(oxidation) | 0.00000293 | 2344.3602 | -0.0207  | -8.82599 |
| CQVCHKme2AFTQT\$H    | CQVCHK    | 1,C(Carbamid   | 0.0000754  | 1879.9578 | -0.00265 | -1.40885 |
| EANDSDV\$QPSGAQRA    | EANDSDV   | 24,K(Di-methy  | 0.000619   | 2797.4653 | 0.02763  | 9.873146 |
| EKme2LCEYK           | EKLCEYK   | 2,K(Di-methyla | 0.00035    | 1004.5394 | 0.0029   | 2.883995 |
| GSFKme2YAWVLDK\$K    | GSFKYAV   | 4,K(Di-methyla | 4.2E-10    | 1589.9363 | 0.00351  | 2.206233 |
| ILEMoxDIEEI\$QNCYDYK | ILEMDIEE  | 4,M(oxidation) | 0.000458   | 2400.2007 | 0.00251  | 1.045306 |
| Kme2ELEEQPTR         | KELEEQP   | 1,K(Di-methyla | 0.0000013  | 1164.6532 | 0.00707  | 6.065194 |
| Kme2LQ\$SGLVWTNCW    | KLQSGLV   | 1,K(Di-methyla | 0.000263   | 1909.0789 | -0.00066 | -0.34553 |
| Kme2MoxSS\$SCSGLSR   | KMSSSCS   | 1,K(Di-methyla | 0.000924   | 1254.6362 | -0.00902 | -7.18362 |
| Kme2SAPAT\$GGVKme2   | KSAPATG   | 1,K(Di-methyla | 0.0000586  | 1504.9776 | -0.00173 | -1.14875 |
| KLLSKme2EPNPPIDQV    | KLLSKEP   | 5,K(Di-methyla | 0.00112    | 2618.5665 | -0.00478 | -1.82473 |
| KNPNKEDKme2R         | KNPNKED   | 8,K(Di-methyla | 5.21E-07   | 1163.6804 | -0.00274 | -2.35257 |
| LKme2WAF\$SMYDLDGN   | LKWAFSN   | 2,K(Di-methyla | 0.000457   | 2611.3277 | -0.01269 | -4.85775 |
| LTLAKme2GEYK         | LTLAKGE   | 5,K(Di-methyla | 0.00000376 | 1057.6565 | -0.00157 | -1.483   |
| MoxD\$STEPYPYSQKme2  | MDSTEPF   | 1,M(oxidation) | 0.0000294  | 1493.7486 | 0.00248  | 1.659131 |
| NTGKme2EEQ\$RAR      | NTGKEEQ   | 4,K(Di-methyla | 0.00000418 | 1223.6764 | -0.00812 | -6.63033 |
| PDLCAQD\$NPMNPKme2   | PDLCAQD   | 4,C(Carbamid   | 0.00000274 | 1666.8473 | -0.00354 | -2.12249 |
| QLIVGVN\$KMoxDSTEPF  | QLIVGVN   | 9,M(oxidation) | 0.000516   | 2345.2715 | -0.00851 | -3.62703 |
| QLIVGVN\$KMDSTEPYPY  | QLIVGVN   | 19,K(Di-methy  | 8.89E-15   | 2329.2766 | 0.00391  | 1.677904 |
| RMAIEI\$LAWGLRNMKme  | RMAIEILA  | 15,K(Di-methy  | 0.000701   | 1973.2005 | 0.00367  | 1.85897  |
| TIMoxKme2HDG\$TKTEK  | TIMKHDG   | 3,M(oxidation) | 0.000106   | 1842.0335 | 0.00918  | 4.980874 |
| ASPAGW\$AGRAKme3LF   | ASPAGW    | 11,K(Tri-methy | 9.81E-07   | 1393.8608 | 0.01123  | 8.050876 |
| FKme3YASDL\$QRHR     | FKYASDL   | 2,K(Tri-methyl | 0.0000111  | 1473.8506 | -0.0124  | -8.40766 |
| Kme3ESV\$FISGDQEV    | KESVFIS   | 1,K(Tri-methyl | 0.000166   | 1546.8657 | 0.00129  | 0.833401 |
| Kme3MFP\$GLAAPSLPK   | KMFPGLA   | 1,K(Tri-methyl | 1.87E-14   | 1413.8992 | -0.00877 | -6.19833 |
| Kme3SAPAT\$GGVK      | KSAPATG   | 1,K(Tri-methyl | 1.53E-11   | 968.63204 | 0.0018   | 1.856357 |
| QIAADK\$QYKme3GIVDC  | QIAADKQ   | 9,K(Tri-methyl | 7.82E-07   | 2030.1648 | 0.00304  | 1.496671 |
| QITADK\$QYKme3GIIDC  | QITADKQ   | 9,K(Tri-methyl | 1.69E-09   | 2060.1754 | 0.00388  | 1.882411 |
| QYKme3GIIDC\$VVR     | QYKGIIDC  | 3,K(Tri-methyl | 1.67E-10   | 1403.8261 | 0.00099  | 0.704709 |
| QYKme3GIIDC\$VVRIPK  | QYKGIIDC  | 3,K(Tri-methyl | 0.0000269  | 1742.0578 | 0.00143  | 0.820393 |
| QYKme3GIVDC\$IVR     | QYKGIVD   | 3,K(Tri-methyl | 0.00000167 | 1403.8261 | 0.01079  | 7.680567 |

mono-, di- and tri-methylation of lysine, and oxidation of methionine, respectively.

| Protein ID | Protein S | Gene Syn | Protein Na  | Methylation type | Sample source |
|------------|-----------|----------|-------------|------------------|---------------|
| IPI002934  | SWISS-PP  | SRP14    | Signal rec  | Mono-methylation | normal        |
| IPI003013  | SWISS-PP  | POLR3B   | DNA-direct  | Mono-methylation | normal        |
| IPI004119  | SWISS-PP  | SNORD11  | Nucleolar g | Mono-methylation | normal        |
| IPI000181  | SWISS-PP  | SYNCRIP  | Isoform 1 c | Mono-methylation | normal        |
| IPI000274  | SWISS-PP  | RHOC     | Rho-relate  | Mono-methylation | normal        |
| IPI003825  | TREMBL:C  | PNKD     | Myofibrillo | Mono-methylation | normal        |
| IPI000112  | SWISS-PP  | HNRPDL   | Isoform 1 c | Mono-methylation | normal        |
| IPI003752  | SWISS-PP  | LAMA1    | Laminin su  | Mono-methylation | normal        |
| IPI000098  | SWISS-PP  | VCAN     | Isoform VO  | Mono-methylation | normal        |
| IPI000039  | SWISS-PP  | HIST2H2E | Histone H2  | Mono-methylation | normal        |
| IPI000695  | SWISS-PP  | C3orf49  | Putative ur | Mono-methylation | normal        |
| IPI001427  | SWISS-PP  | DNAJC21  | Isoform 1 c | Mono-methylation | normal        |
| IPI003824  | SWISS-PP  | HSP90AA  | Isoform 2 c | Mono-methylation | normal        |
| IPI004127  | SWISS-PP  | MAP3K15  | Isoform 1 c | Mono-methylation | normal        |
| IPI000000  | SWISS-PP  | NRAS     | GTPase N    | Mono-methylation | normal        |
| IPI000008  | SWISS-PP  | LASP1    | Isoform 1 c | Mono-methylation | normal        |
| IPI003838  | SWISS-PP  | DCST2    | Isoform 2 c | Mono-methylation | normal        |
| IPI000128  | SWISS-PP  | ATP8B1   | Probable p  | Mono-methylation | normal        |
| IPI000207  | SWISS-PP  | C14orf91 | Putative ur | Mono-methylation | normal        |
| IPI000690  | SWISS-PP  | TRRAP    | Isoform 1 c | Mono-methylation | normal        |
| IPI002974  | SWISS-PP  | SNRPA1   | U2 small n  | Mono-methylation | normal        |
| IPI000439  | SWISS-PP  | PARD3B   | Isoform 1 c | Mono-methylation | normal        |
| IPI001649  | SWISS-PP  | KIAA1033 | Isoform 2 c | Mono-methylation | normal        |
| IPI007841  | SWISS-PP  | GPCRLTM  | Putative ol | Mono-methylation | normal        |
| IPI007831  | SWISS-PP  | CCDC150  | Isoform 1 c | Mono-methylation | normal        |
| IPI000300  | SWISS-PP  | FAM50A   | Protein FA  | Mono-methylation | normal        |
| IPI000177  | SWISS-PP  | TIMP4    | Metallopro  | Mono-methylation | normal        |
| IPI007829  | SWISS-PP  | ZFP106   | Zinc finger | Mono-methylation | normal        |
| IPI000102  | SWISS-PP  | KRCC1    | Lysine-rich | Mono-methylation | normal        |
| IPI000102  | SWISS-PP  | RAC2     | Ras-relate  | Mono-methylation | normal        |
| IPI009262  | TREMBL:G  | MAP2     | Uncharacte  | Mono-methylation | normal        |
| IPI000229  | SWISS-PP  | CD74     | Isoform 1 c | Mono-methylation | normal        |
| IPI002938  | SWISS-PP  | RIF1     | Isoform 1 c | Mono-methylation | normal        |
| IPI003294  | SWISS-PP  | NDST3    | Isoform 1 c | Mono-methylation | normal        |
| IPI003850  | SWISS-PP  | CEP112   | Isoform 1 c | Mono-methylation | normal        |
| IPI000100  | SWISS-PP  | ZKSCAN3  | Zinc finger | Mono-methylation | normal        |
| IPI000060  | SWISS-PP  | CKLF-CM  | Isoform 1 c | Mono-methylation | normal        |
| IPI000188  | SWISS-PP  | C12orf35 | Uncharacte  | Mono-methylation | normal        |
| IPI000129  | TREMBL:G  | SPRY2    | Uncharacte  | Mono-methylation | normal        |
| IPI000119  | SWISS-PP  | MCC      | Isoform 1 c | Mono-methylation | normal        |
| IPI004566  | SWISS-PP  | RLTPR    | Leucine-ric | Mono-methylation | normal        |
| IPI007927  | SWISS-PP  | LTBP4    | Isoform 3 c | Mono-methylation | normal        |
| IPI005558  | TREMBL:G  | ANKRD11  | Ankyrin reg | Mono-methylation | normal        |
| IPI002171  | SWISS-PP  | SLITRK4  | SLIT and N  | Mono-methylation | normal        |
| IPI000055  | SWISS-PP  | EHD4     | EH domain   | Mono-methylation | normal        |
| IPI003769  | SWISS-PP  | CDK17    | Cyclin-dep  | Mono-methylation | normal        |



|            |            |         |              |                  |        |
|------------|------------|---------|--------------|------------------|--------|
| IPI0001084 | SWISS-PROT | CD72    | B-cell diffe | Mono-methylation | normal |
| IPI0064543 | SWISS-PROT | MTUS2   | Isoform 2 c  | Mono-methylation | normal |
| IPI0096448 | TREMBL     | SIL1    | Uncharacte   | Mono-methylation | normal |
| IPI0021819 | SWISS-PROT | ITIH4   | Isoform 2 c  | Mono-methylation | normal |
| IPI0101205 | -          | ATG16L2 | Protein      | Mono-methylation | normal |
| IPI0000857 | SWISS-PROT | KHDRBS1 | Isoform 1 c  | Mono-methylation | normal |
| IPI0045674 | SWISS-PROT | SH3BP1  | Isoform 1 c  | Mono-methylation | normal |
| IPI0000007 | SWISS-PROT | LDLR    | Low-densit   | Mono-methylation | normal |
| IPI0055256 | SWISS-PROT | ERCC6L  | DNA excis    | Mono-methylation | normal |
| IPI0091079 | TREMBL     | SUGP2   | cDNA FLJ5    | Mono-methylation | normal |
| IPI0001207 | SWISS-PROT | HNRNPR  | Isoform 1 c  | Mono-methylation | normal |
| IPI0014876 | SWISS-PROT | TRIOBP  | TRIO and     | Mono-methylation | normal |
| IPI0033558 | SWISS-PROT | UBR3    | Isoform 1 c  | Mono-methylation | normal |
| IPI0016543 | SWISS-PROT | WDR60   | WD repeat    | Mono-methylation | normal |
| IPI0000467 | SWISS-PROT | GOLGB1  | Golgin sub   | Mono-methylation | normal |
| IPI0021734 | SWISS-PROT | CD302   | CD302 ant    | Mono-methylation | normal |
| IPI0000843 | SWISS-PROT | RPS10   | 40S riboso   | Mono-methylation | normal |
| IPI0002199 | SWISS-PROT | IL18RAP | Interleukin  | Mono-methylation | normal |
| IPI0000968 | SWISS-PROT | ARHGAP2 | Isoform 2 c  | Mono-methylation | normal |
| IPI0079022 | SWISS-PROT | CCDC39  | Isoform 1 c  | Mono-methylation | normal |
| IPI0001286 | TREMBL     | ZNF211  | zinc finger  | Mono-methylation | normal |
| IPI0001164 | SWISS-PROT | PTPRE   | Receptor-t   | Mono-methylation | normal |
| IPI0001036 | SWISS-PROT | KIF2A   | Uncharacte   | Mono-methylation | normal |
| IPI0002053 | SWISS-PROT | LRP1    | Prolow-der   | Mono-methylation | normal |
| IPI0015136 | SWISS-PROT | TRPM6   | Isoform TR   | Mono-methylation | normal |
| IPI0001596 | SWISS-PROT | TRPA1   | Transient r  | Mono-methylation | normal |
| IPI0030644 | SWISS-PROT | ZNF24   | Isoform 1 c  | Mono-methylation | normal |
| IPI0001879 | SWISS-PROT | DNAJC17 | DnaJ hom     | Mono-methylation | normal |
| IPI0021596 | SWISS-PROT | HNRNPA1 | Isoform A1   | Mono-methylation | normal |
| IPI0046542 | SWISS-PROT | RUFY1   | Isoform 2 c  | Mono-methylation | normal |
| IPI0091594 | TREMBL     | HSPD1   | Uncharacte   | Mono-methylation | normal |
| IPI0074393 | SWISS-PROT | URGCP   | up-regulate  | Mono-methylation | normal |
| IPI0001059 | SWISS-PROT | HELLS   | Isoform 1 c  | Mono-methylation | normal |
| IPI0074268 | SWISS-PROT | TPR     | Nucleopro    | Mono-methylation | normal |
| IPI0032930 | SWISS-PROT | KRT74   | Keratin, ty  | Mono-methylation | normal |
| IPI0029386 | SWISS-PROT | DDT     | D-dopachr    | Mono-methylation | normal |
| IPI0030333 | SWISS-PROT | NEB     | Nebulin      | Mono-methylation | normal |
| IPI0002263 | SWISS-PROT | SEPT3   | Isoform 3 c  | Mono-methylation | normal |
| IPI0029121 | SWISS-PROT | PARP14  | Isoform 6 c  | Mono-methylation | normal |
| IPI0022039 | SWISS-PROT | PHKG1   | PHKG1 pro    | Mono-methylation | normal |
| IPI0001060 | SWISS-PROT | PLCE1   | Isoform 1 c  | Mono-methylation | normal |
| IPI0085573 | SWISS-PROT | C2orf89 | Isoform 2 c  | Mono-methylation | normal |
| IPI0044234 | TREMBL     | CBRAT1  | FLJ00321     | Mono-methylation | normal |
| IPI0000212 | SWISS-PROT | DNAH1   | Isoform 2 c  | Mono-methylation | normal |
| IPI0029830 | SWISS-PROT | ATM     | Serine-pro   | Mono-methylation | normal |
| IPI0002821 | SWISS-PROT | SEMA3D  | Semaphori    | Mono-methylation | normal |
| IPI0092218 | TREMBL     | MCM2    | cDNA FLJ5    | Mono-methylation | normal |
| IPI0010359 | SWISS-PROT | SORCS1  | Isoform 1 c  | Mono-methylation | normal |
| IPI0078420 | -          | CEP290  | 291 kDa p    | Mono-methylation | normal |

|           |            |          |              |                  |        |
|-----------|------------|----------|--------------|------------------|--------|
| IPI003948 | SWISS-PROT | SMTNL2   | Isoform 1 c  | Mono-methylation | normal |
| IPI009084 | TREMBL     | CIAPIN1  | cDNA FLJ3    | Mono-methylation | normal |
| IPI000046 | SWISS-PROT | GOLGB1   | Golgin sub   | Mono-methylation | normal |
| IPI000194 | SWISS-PROT | FBN2     | Isoform 1 c  | Mono-methylation | normal |
| IPI001819 | SWISS-PROT | METTL2B  | Isoform 2 c  | Mono-methylation | normal |
| IPI002974 | SWISS-PROT | SLC45A4  | Isoform 3 c  | Mono-methylation | normal |
| IPI001778 | SWISS-PROT | LENG8    | Uncharacter  | Mono-methylation | normal |
| IPI000297 | SWISS-PROT | GRIN2A   | Glutamate    | Mono-methylation | normal |
| IPI003865 | SWISS-PROT | RASSF4   | Isoform 2 c  | Mono-methylation | normal |
| IPI004387 | SWISS-PROT | MBD1     | Isoform 5 c  | Mono-methylation | normal |
| IPI006516 | SWISS-PROT | DNAH2    | Isoform 2 c  | Mono-methylation | normal |
| IPI000071 | SWISS-PROT | ANKRD26  | Isoform 2 c  | Mono-methylation | normal |
| IPI000057 | SWISS-PROT | ST18     | Suppressio   | Mono-methylation | normal |
| IPI003392 | SWISS-PROT | HSPA6    | Heat shock   | Mono-methylation | normal |
| IPI009813 | TREMBL     | MICU1    | Uncharacter  | Mono-methylation | normal |
| IPI007841 | SWISS-PROT | HSPD1    | 60 kDa hea   | Mono-methylation | normal |
| IPI000290 | SWISS-PROT | EIF3A    | Eukaryotic   | Mono-methylation | normal |
| IPI009773 | TREMBL     | ANO3     | Uncharacter  | Mono-methylation | normal |
| IPI009836 | -          | LOC65015 | peptidyl-pr  | Mono-methylation | normal |
| IPI000124 | SWISS-PROT | G3BP1    | Ras GTPa     | Mono-methylation | normal |
| IPI000222 | SWISS-PROT | HDLBP    | Vigilin      | Mono-methylation | normal |
| IPI009417 | SWISS-PROT | TCEB3    | Transcripti  | Mono-methylation | normal |
| IPI004018 | SWISS-PROT | MIPOL1   | Isoform 3 c  | Mono-methylation | normal |
| IPI002193 | SWISS-PROT | RPL3L    | 60S riboso   | Mono-methylation | normal |
| IPI003838 | SWISS-PROT | DCST2    | Isoform 2 c  | Mono-methylation | normal |
| IPI001581 | SWISS-PROT | NFX1     | Isoform 2 c  | Mono-methylation | normal |
| IPI000258 | SWISS-PROT | BCHE     | Butyrylcho   | Mono-methylation | normal |
| IPI007831 | SWISS-PROT | C2orf63  | Isoform 1 c  | Mono-methylation | normal |
| IPI001511 | SWISS-PROT | TTK      | Dual speci   | Mono-methylation | normal |
| IPI000000 | SWISS-PROT | PFDN1    | Prefoldin s  | Mono-methylation | normal |
| IPI000097 | SWISS-PROT | RXRG     | Retinoic ac  | Mono-methylation | normal |
| IPI010147 | TREMBL     | CDMD     | Uncharacter  | Mono-methylation | normal |
| IPI000659 | SWISS-PROT | CATSPER  | Isoform 1 c  | Mono-methylation | normal |
| IPI000218 | SWISS-PROT | AHNAK    | Neuroblast   | Mono-methylation | normal |
| IPI004008 | SWISS-PROT | DOK6     | Docking pr   | Mono-methylation | normal |
| IPI000210 | SWISS-PROT | PKP4     | Plakophilin  | Mono-methylation | normal |
| IPI005140 | SWISS-PROT | C9orf104 | Uncharacter  | Mono-methylation | normal |
| IPI000168 | SWISS-PROT | ZNF670   | Zinc finger  | Mono-methylation | normal |
| IPI009653 | SWISS-PROT | DTHD1    | Uncharacter  | Mono-methylation | normal |
| IPI001733 | SWISS-PROT | PGM2L1   | Glucose 1,   | Mono-methylation | normal |
| IPI000024 | SWISS-PROT | OAS3     | 2'-5'-oligoa | Mono-methylation | normal |
| IPI000087 | SWISS-PROT | RSL1D1   | Ribosomal    | Mono-methylation | normal |
| IPI005500 | SWISS-PROT | GPBP1L1  | Vasculin-li  | Mono-methylation | normal |
| IPI002987 | SWISS-PROT | POLRMT   | Similar to   | Mono-methylation | normal |
| IPI002212 | SWISS-PROT | STX2     | Isoform 1 c  | Mono-methylation | normal |
| IPI004102 | SWISS-PROT | CELF2    | Isoform 3 c  | Mono-methylation | normal |
| IPI001790 | SWISS-PROT | MRPL35   | Isoform 1 c  | Mono-methylation | normal |
| IPI002358 | SWISS-PROT | ZNF483   | Zinc finger  | Mono-methylation | normal |
| IPI004018 | SWISS-PROT | CNNM2    | Isoform 3 c  | Mono-methylation | normal |

|            |            |          |              |                  |        |
|------------|------------|----------|--------------|------------------|--------|
| IPI0001754 | SWISS-PROT | KIN      | DNA/RNA      | Mono-methylation | normal |
| IPI0101817 | TREMBL:Q   | ANKRD26  | cDNA FLJ4    | Mono-methylation | normal |
| IPI0002143 | SWISS-PROT | ACTB     | Actin, cyto  | Mono-methylation | normal |
| IPI0002323 | SWISS-PROT | UBA2     | SUMO-acti    | Mono-methylation | normal |
| IPI0002314 | SWISS-PROT | STX16-NF | Isoform B c  | Mono-methylation | normal |
| IPI0022120 | SWISS-PROT | STX2     | Isoform 1 c  | Mono-methylation | normal |
| IPI0017143 | SWISS-PROT | TXNDC5;N | Thioredoxi   | Mono-methylation | normal |
| IPI0004427 | SWISS-PROT | PRLR     | Isoform 4 c  | Mono-methylation | normal |
| IPI0002772 | SWISS-PROT | CASP4    | Caspase-4    | Mono-methylation | normal |
| IPI0000294 | SWISS-PROT | GJC1     | Gap junctio  | Mono-methylation | normal |
| IPI0029384 | SWISS-PROT | RIF1     | Isoform 1 c  | Mono-methylation | normal |
| IPI0029800 | SWISS-PROT | MB21D1   | Isoform 1 c  | Mono-methylation | normal |
| IPI0002780 | SWISS-PROT | POLR2B   | DNA-direct   | Mono-methylation | normal |
| IPI0000609 | SWISS-PROT | BMS1     | Ribosome     | Mono-methylation | normal |
| IPI0005649 | SWISS-PROT | RPL36AL  | 60S riboso   | Mono-methylation | normal |
| IPI0000567 | SWISS-PROT | U2AF1    | Splicing fa  | Mono-methylation | normal |
| IPI0005649 | SWISS-PROT | RPL36AL  | 60S riboso   | Mono-methylation | normal |
| IPI0045347 | SWISS-PROT | HIST2H4E | Histone H4   | Mono-methylation | normal |
| IPI0017167 | SWISS-PROT | HIST2H3D | Histone H3   | Mono-methylation | normal |
| IPI0001127 | SWISS-PROT | HNRPDL   | Isoform 1 c  | Mono-methylation | normal |
| IPI0055623 | -          | LOC64493 | Actin/actin  | Mono-methylation | normal |
| IPI0029550 | SWISS-PROT | WIZ      | Isoform 1 c  | Mono-methylation | normal |
| IPI0017167 | SWISS-PROT | HIST2H3D | Histone H3   | Mono-methylation | normal |
| IPI0001733 | SWISS-PROT | PHB      | Prohibitin   | Mono-methylation | normal |
| IPI0002463 | SWISS-PROT | SLC16A1  | Monocarbo    | Mono-methylation | normal |
| IPI0021577 | SWISS-PROT | SLC25A3  | Isoform B c  | Mono-methylation | normal |
| IPI0017167 | SWISS-PROT | HIST2H3D | Histone H3   | Mono-methylation | normal |
| IPI0000937 | SWISS-PROT | PP1E     | Isoform A c  | Mono-methylation | normal |
| IPI0021903 | SWISS-PROT | H3F3A;H3 | Histone H3   | Mono-methylation | normal |
| IPI0005649 | SWISS-PROT | RPL36AL  | 60S riboso   | Mono-methylation | normal |
| IPI0000940 | SWISS-PROT | EXOSC10  | Isoform 1 c  | Mono-methylation | normal |
| IPI0041142 | SWISS-PROT | CERKL    | Isoform 2 c  | Mono-methylation | normal |
| IPI0000940 | SWISS-PROT | EXOSC10  | Isoform 1 c  | Mono-methylation | normal |
| IPI0000567 | SWISS-PROT | U2AF1    | Splicing fa  | Mono-methylation | normal |
| IPI0005649 | SWISS-PROT | RPL36AL  | 60S riboso   | Mono-methylation | normal |
| IPI0001127 | SWISS-PROT | HNRPDL   | Isoform 1 c  | Mono-methylation | normal |
| IPI0046543 | SWISS-PROT | ALDOA    | Fructose-b   | Mono-methylation | normal |
| IPI0001442 | SWISS-PROT | EEF1A2   | Elongation   | Mono-methylation | normal |
| IPI0079783 | TREMBL:Q   | CCHCR1   | cDNA FLJ3    | Mono-methylation | normal |
| IPI0016364 | SWISS-PROT | CASC5    | Isoform 3 c  | Mono-methylation | normal |
| IPI0017843 | SWISS-PROT | RECQL    | ATP-deper    | Mono-methylation | normal |
| IPI0002187 | SWISS-PROT | AHNAK    | Neuroblast   | Mono-methylation | normal |
| IPI0095588 | SWISS-PROT | ZBED6    | Zinc finger  | Mono-methylation | normal |
| IPI0021872 | -          | LAMA2    | laminin sub  | Mono-methylation | normal |
| IPI0000490 | TREMBL:Q   | PIEZO2   | Uncharacte   | Mono-methylation | normal |
| IPI0030582 | SWISS-PROT | PRR11    | Proline-rich | Mono-methylation | normal |
| IPI0029967 | SWISS-PROT | RGL1     | Isoform B c  | Mono-methylation | normal |
| IPI0000467 | SWISS-PROT | GOLGB1   | Golgin sub   | Mono-methylation | normal |
| IPI0089588 | SWISS-PROT | MYO1G    | Isoform 3 c  | Mono-methylation | normal |

|            |            |          |              |                  |        |
|------------|------------|----------|--------------|------------------|--------|
| IPI0102536 | -          | ALDH6A1  | 56 kDa pro   | Mono-methylation | normal |
| IPI0002008 | SWISS-PROT | IL26     | Interleukin  | Mono-methylation | normal |
| IPI0016834 | SWISS-PROT | GRAMD1   | Isoform 3 c  | Mono-methylation | normal |
| IPI0030688 | SWISS-PROT | CHST3    | Carbohydr    | Mono-methylation | normal |
| IPI0096683 | -          | MXD4     | Protein      | Mono-methylation | normal |
| IPI0017176 | SWISS-PROT | KIF18A   | Kinesin-like | Mono-methylation | normal |
| IPI0087384 | SWISS-PROT | RGS1     | Isoform 1 c  | Mono-methylation | normal |
| IPI0017488 | SWISS-PROT | ZNF780A  | Isoform 1 c  | Mono-methylation | normal |
| IPI0092117 | -          | ATP2B3   | Similar to P | Mono-methylation | normal |
| IPI0029828 | SWISS-PROT | ERBB3    | Isoform 1 c  | Mono-methylation | normal |
| IPI0084754 | SWISS-PROT | TRANK1   | TPR and a    | Mono-methylation | normal |
| IPI0000568 | SWISS-PROT | HSD11B1  | Corticoster  | Mono-methylation | normal |
| IPI0003153 | SWISS-PROT | ST6GALN  | Alpha-N-ac   | Mono-methylation | normal |
| IPI0017974 | SWISS-PROT | GDPD4    | Isoform 1 c  | Mono-methylation | normal |
| IPI0030007 | SWISS-PROT | PWP2     | Periodic try | Mono-methylation | normal |
| IPI0001814 | TREMBL     | NONO     | clone tec14  | Mono-methylation | normal |
| IPI0054976 | SWISS-PROT | FAM40A   | Isoform 1 c  | Mono-methylation | normal |
| IPI0064069 | SWISS-PROT | SLC41A3  | Isoform 6 c  | Mono-methylation | normal |
| IPI0029502 | SWISS-PROT | NKTR     | NK-tumor     | Mono-methylation | normal |
| IPI0101483 | TREMBL     | MSR1     | Uncharacte   | Mono-methylation | normal |
| IPI0002296 | SWISS-PROT | KIAA1826 | Coiled-coil  | Mono-methylation | normal |
| IPI0000284 | SWISS-PROT | PPP2R5E  | Serine/thre  | Di-methylation   | normal |
| IPI0038247 | SWISS-PROT | HSP90AA  | Isoform 2 c  | Di-methylation   | normal |
| IPI0000290 | SWISS-PROT | TEAD1    | Transcripti  | Di-methylation   | normal |
| IPI0098269 | -          | -        | Similar to P | Di-methylation   | normal |
| IPI0094252 | TREMBL     | SMEK1    | Uncharacte   | Di-methylation   | normal |
| IPI0000979 | SWISS-PROT | PFKP     | 6-phospho    | Di-methylation   | normal |
| IPI0002436 | SWISS-PROT | ATP9A    | Isoform Lo   | Di-methylation   | normal |
| IPI0000174 | SWISS-PROT | MYH4     | Myosin-4     | Di-methylation   | normal |
| IPI0018076 | SWISS-PROT | KAT7     | Histone ac   | Di-methylation   | normal |
| IPI0000173 | SWISS-PROT | ETV7     | Isoform B c  | Di-methylation   | normal |
| IPI0002318 | SWISS-PROT | TOM1L1   | TOM1-like    | Di-methylation   | normal |
| IPI0016816 | TREMBL     | CLASP2   | Uncharacte   | Di-methylation   | normal |
| IPI0023414 | SWISS-PROT | ANKRD56  | Ankyrin reg  | Di-methylation   | normal |
| IPI0032953 | SWISS-PROT | EEA1     | Early endo   | Di-methylation   | normal |
| IPI0055271 | TREMBL     | IPO11    | Putative ur  | Di-methylation   | normal |
| IPI0001014 | SWISS-PROT | CHRAC1   | Chromatin    | Di-methylation   | normal |
| IPI0003216 | SWISS-PROT | FOXM1    | Isoform 1 c  | Di-methylation   | normal |
| IPI0003400 | SWISS-PROT | PTPN23   | Tyrosine-p   | Di-methylation   | normal |
| IPI0029179 | SWISS-PROT | SLX4     | Isoform 1 c  | Di-methylation   | normal |
| IPI0002589 | SWISS-PROT | NAA25    | Isoform 1 c  | Di-methylation   | normal |
| IPI0002768 | SWISS-PROT | NNMT     | Nicotinami   | Di-methylation   | normal |
| IPI0002623 | SWISS-PROT | HNRNPH2  | Heterogen    | Di-methylation   | normal |
| IPI0017439 | TREMBL     | FAM75C2  | hypothetica  | Di-methylation   | normal |
| IPI0002851 | SWISS-PROT | TAF6     | Isoform 1 c  | Di-methylation   | normal |

|            |            |           |                     |                |        |
|------------|------------|-----------|---------------------|----------------|--------|
| IPI0002856 | SWISS-PROT | GBP1      | Interferon- $\beta$ | Di-methylation | normal |
| IPI0097398 | TREMBL     | C8orf44-S | Uncharacteri        | Di-methylation | normal |
| IPI0001424 | SWISS-PROT | IQCB1     | Isoform 1 c         | Di-methylation | normal |
| IPI0002126 | SWISS-PROT | YWHAZ     | 2014-3-3 p          | Di-methylation | normal |
| IPI0030128 | SWISS-PROT | FBXW11    | Isoform B c         | Di-methylation | normal |
| IPI0002222 | SWISS-PROT | C19orf29  | Isoform 2 c         | Di-methylation | normal |
| IPI0001442 | SWISS-PROT | EEF1A2    | Elongation          | Di-methylation | normal |
| IPI0001922 | SWISS-PROT | AKAP9     | Isoform 1 c         | Di-methylation | normal |
| IPI0029784 | SWISS-PROT | MLL2      | Isoform 1 c         | Di-methylation | normal |
| IPI0037687 | SWISS-PROT | CCDC33    | Uncharacteri        | Di-methylation | normal |
| IPI0046542 | SWISS-PROT | RUFY1     | Isoform 2 c         | Di-methylation | normal |
| IPI0055556 | SWISS-PROT | HSP90AB1  | Putative he         | Di-methylation | normal |
| IPI0001344 | SWISS-PROT | TSPAN6    | Tetraspanin         | Di-methylation | normal |
| IPI0010192 | SWISS-PROT | SPG11     | Isoform 1 c         | Di-methylation | normal |
| IPI0054978 | SWISS-PROT | NOSTRIN   | Isoform 1 c         | Di-methylation | normal |
| IPI0029232 | SWISS-PROT | SPAG1     | Sperm-ass           | Di-methylation | normal |
| IPI0091018 | TREMBL     | PIK3R3    | cDNA FLJ            | Di-methylation | normal |
| IPI0089642 | SWISS-PROT | C6orf132  | Isoform 1 c         | Di-methylation | normal |
| IPI0092242 | TREMBL     | PRMT3     | protein arg         | Di-methylation | normal |
| IPI0029297 | SWISS-PROT | RBM27     | RNA-bindin          | Di-methylation | normal |
| IPI0001833 | SWISS-PROT | FLT1      | Isoform Flt         | Di-methylation | normal |
| IPI0087384 | SWISS-PROT | RGS1      | Isoform 1 c         | Di-methylation | normal |
| IPI0047317 | SWISS-PROT | ZNF443    | cDNA FLJ            | Di-methylation | normal |
| IPI0021873 | SWISS-PROT | PDE6A     | Rod cGMP            | Di-methylation | normal |
| IPI0002328 | SWISS-PROT | TTN       | Isoform 2 c         | Di-methylation | normal |
| IPI0001544 | SWISS-PROT | LRRRC31   | Isoform 2 c         | Di-methylation | normal |
| IPI0001232 | SWISS-PROT | PRKG2     | cGMP-dep            | Di-methylation | normal |
| IPI0064538 | TREMBL     | ASPM      | Uncharacteri        | Di-methylation | normal |
| IPI0047060 | SWISS-PROT | OR6C75    | Olfactory r         | Di-methylation | normal |
| IPI0021968 | SWISS-PROT | VAV3      | Isoform 2 c         | Di-methylation | normal |
| IPI0001193 | SWISS-PROT | CCP110    | Isoform 1 c         | Di-methylation | normal |
| IPI0001316 | SWISS-PROT | PRPH      | Isoform 1 c         | Di-methylation | normal |
| IPI0018566 | SWISS-PROT | USP32     | Ubiquitin c         | Di-methylation | normal |
| IPI0005994 | SWISS-PROT | DHRS13    | Isoform 1 c         | Di-methylation | normal |
| IPI0038442 | SWISS-PROT | TDRD9     | Isoform 1 c         | Di-methylation | normal |
| IPI0038310 | SWISS-PROT | CHD9      | Isoform 1 c         | Di-methylation | normal |
| IPI0023584 | SWISS-PROT | ZNF483    | Zinc finger         | Di-methylation | normal |
| IPI0004474 | SWISS-PROT | FMNL2     | Similar to F        | Di-methylation | normal |
| IPI0030737 | SWISS-PROT | BTBD16    | Isoform 2 c         | Di-methylation | normal |
| IPI0002090 | SWISS-PROT | ZNF41     | Isoform 1 c         | Di-methylation | normal |
| IPI0017112 | SWISS-PROT | GATAD1    | GATA zinc           | Di-methylation | normal |
| IPI0037556 | SWISS-PROT | ZNF804A   | Zinc finger         | Di-methylation | normal |
| IPI0003039 | SWISS-PROT | BNIP1     | Isoform 3 c         | Di-methylation | normal |

|            |            |          |                                                               |                 |        |
|------------|------------|----------|---------------------------------------------------------------|-----------------|--------|
| IPI0002362 | SWISS-PROT | GNG3     | Guanine nucleoside                                            | Di-methylation  | normal |
| IPI0000436 | SWISS-PROT | MORC1    | MORC family class 1 domain containing protein 1               | Di-methylation  | normal |
| IPI0037392 | SWISS-PROT | C19orf45 | Uncharacterized protein C19orf45                              | Di-methylation  | normal |
| IPI0010192 | SWISS-PROT | LZTS2    | Leucine zipper motif containing protein 2                     | Di-methylation  | normal |
| IPI0001767 | SWISS-PROT | CCDC19   | Coiled-coil domain containing 19                              | Di-methylation  | normal |
| IPI0087384 | SWISS-PROT | RGS1     | Isoform 1 of Regulator of G-protein signaling 1               | Di-methylation  | normal |
| IPI0001442 | SWISS-PROT | EEF1A2   | Elongation factor 1A2                                         | Di-methylation  | normal |
| IPI0018073 | -          | -        | Similar to EEF1A2                                             | Di-methylation  | normal |
| IPI0001442 | SWISS-PROT | EEF1A2   | Elongation factor 1A2                                         | Di-methylation  | normal |
| IPI0018073 | -          | -        | Similar to EEF1A2                                             | Di-methylation  | normal |
| IPI0001442 | SWISS-PROT | EEF1A2   | Elongation factor 1A2                                         | Di-methylation  | normal |
| IPI0038444 | SWISS-PROT | KRT14    | Keratin, type II class I member 14                            | Di-methylation  | normal |
| IPI0018073 | -          | -        | Similar to KRT14                                              | Di-methylation  | normal |
| IPI0018073 | -          | -        | Similar to KRT14                                              | Di-methylation  | normal |
| IPI0001442 | SWISS-PROT | EEF1A2   | Elongation factor 1A2                                         | Di-methylation  | normal |
| IPI0094229 | SWISS-PROT | OPRM1    | Isoform 5 of Opioid receptor mu 1                             | Di-methylation  | normal |
| IPI0028901 | SWISS-PROT | DOT1L    | Isoform 2 of Dot1-like protein                                | Di-methylation  | normal |
| IPI0001442 | SWISS-PROT | EEF1A2   | Elongation factor 1A2                                         | Di-methylation  | normal |
| IPI0044846 | SWISS-PROT | ANKRD12  | Isoform 1 of Ankyrin repeat domain 12                         | Di-methylation  | normal |
| IPI0029121 | SWISS-PROT | IFI44    | Interferon-induced protein 44                                 | Di-methylation  | normal |
| IPI0092650 | TREMBL     | TXNDC3   | Uncharacterized protein TXNDC3                                | Di-methylation  | normal |
| IPI0000259 | SWISS-PROT | DGKB     | Isoform 1 of Dipeptidylglycine aminohydrolase                 | Di-methylation  | normal |
| IPI0033433 | TREMBL     | SDCCAG8  | Uncharacterized protein SDCCAG8                               | Di-methylation  | normal |
| IPI0001815 | TREMBL     | NONO     | clone tec14                                                   | Di-methylation  | normal |
| IPI0039879 | SWISS-PROT | RTN3     | Isoform 2 of Reelin type III domain containing 3              | Di-methylation  | normal |
| IPI0017161 | SWISS-PROT | HIST2H3D | Histone H3.2                                                  | Di-methylation  | normal |
| IPI0018073 | -          | -        | Similar to HIST2H3D                                           | Di-methylation  | normal |
| IPI0043047 | SWISS-PROT | ASCC3    | Activating signal cointegrator complex 3                      | Di-methylation  | normal |
| IPI0093024 | -          | LOC40098 | ankyrin repeat domain containing 1                            | Di-methylation  | normal |
| IPI0045347 | SWISS-PROT | HIST2H4E | Histone H4.2                                                  | Di-methylation  | normal |
| IPI0010231 | SWISS-PROT | ANKRD27  | Ankyrin repeat domain 27                                      | Di-methylation  | normal |
| IPI0038466 | SWISS-PROT | ANO1     | Isoform 3 of Ankyrin domain containing 1                      | Di-methylation  | normal |
| IPI0029550 | SWISS-PROT | WIZ      | Isoform 1 of WIZ                                              | Tri-methylation | normal |
| IPI0004374 | SWISS-PROT | SCLT1    | Isoform 1 of SCLY1                                            | Tri-methylation | normal |
| IPI0000546 | SWISS-PROT | TSPYL2   | Testis-specific protein Y-like 2                              | Tri-methylation | normal |
| IPI0000893 | SWISS-PROT | HMGCS2   | Hydroxymethylglutaryl-CoA synthase 2                          | Tri-methylation | normal |
| IPI0002660 | SWISS-PROT | SURF6    | Surfeit locus 6                                               | Tri-methylation | normal |
| IPI0087220 | SWISS-PROT | TNRC18   | Isoform 1 of Tumor necrosis factor receptor class 1 member 18 | Tri-methylation | normal |
| IPI0033764 | SWISS-PROT | C9orf91  | Isoform 3 of Chromosome 9 open reading frame 91               | Tri-methylation | normal |
| IPI0029468 | SWISS-PROT | C15orf23 | Isoform 1 of Chromosome 15 open reading frame 23              | Tri-methylation | normal |
| IPI0021882 | SWISS-PROT | MLL4     | Isoform 1 of Mixed lineage leukemia 4                         | Tri-methylation | normal |
| IPI0002321 | SWISS-PROT | RYR2     | Isoform 1 of Ryanodine receptor 2                             | Tri-methylation | normal |
| IPI0021571 | SWISS-PROT | CAMK2A   | Isoform A of Calcium/calmodulin-dependent protein kinase 2    | Tri-methylation | normal |

|           |            |          |             |                 |        |
|-----------|------------|----------|-------------|-----------------|--------|
| IPI000329 | SWISS-PROT | ZC4H2    | Isoform 1 c | Tri-methylation | normal |
| IPI004783 | SWISS-PROT | LCOR     | Isoform 1 c | Tri-methylation | normal |
| IPI007831 | SWISS-PROT | C2orf63  | Isoform 1 c | Tri-methylation | normal |
| IPI001074 | SWISS-PROT | WHSC1    | Isoform 3 c | Tri-methylation | normal |
| IPI000079 | SWISS-PROT | PRPF8    | Pre-mRNA    | Tri-methylation | normal |
| IPI000365 | SWISS-PROT | ADAMTS1  | Isoform 1 c | Tri-methylation | normal |
| IPI000315 | SWISS-PROT | RFC3     | Replication | Tri-methylation | normal |
| IPI000342 | SWISS-PROT | TMCO7    | Transmem    | Tri-methylation | normal |
| IPI002955 | SWISS-PROT | WIZ      | Isoform 1 c | Tri-methylation | normal |
| IPI000193 | SWISS-PROT | DYNLL1   | Dynein lig  | Tri-methylation | normal |
| IPI001811 | TREMBL     | BCAT2    | Branched-   | Tri-methylation | normal |
| IPI000289 | SWISS-PROT | PDE1C    | Isoform PD  | Tri-methylation | normal |
| IPI003869 | SWISS-PROT | TNIP3    | TNFAIP3-i   | Tri-methylation | normal |
| IPI000213 | SWISS-PROT | CLEC2B   | C-type lect | Tri-methylation | normal |
| IPI000093 | SWISS-PROT | AGXT     | Serine--py  | Tri-methylation | normal |
| IPI002472 | SWISS-PROT | SYNE1    | Isoform 4 c | Tri-methylation | normal |
| IPI009674 | TREMBL     | SLC27A6  | Uncharacte  | Tri-methylation | normal |
| IPI007426 | SWISS-PROT | TPR      | Nucleoprot  | Tri-methylation | normal |
| IPI004131 | SWISS-PROT | C15orf42 | Isoform 2 c | Tri-methylation | normal |
| IPI000021 | SWISS-PROT | TACC3    | Transformi  | Tri-methylation | normal |
| IPI004117 | SWISS-PROT | BSPH1    | Bovine ser  | Tri-methylation | normal |
| IPI001640 | SWISS-PROT | CCDC136  | Isoform 4 c | Tri-methylation | normal |
| IPI000290 | SWISS-PROT | LARGE    | Isoform 1 c | Tri-methylation | normal |
| IPI002168 | SWISS-PROT | RELL1    | RELT-like   | Tri-methylation | normal |
| IPI006436 | TREMBL     | LOC64424 | Uncharacte  | Tri-methylation | normal |
| IPI001689 | TREMBL     | COR4H12P | Uncharacte  | Tri-methylation | normal |
| IPI008729 | SWISS-PROT | LOC10012 | Putative U  | Tri-methylation | normal |
| IPI000123 | SWISS-PROT | TRIM35   | Isoform 1 c | Tri-methylation | normal |
| IPI003005 | SWISS-PROT | UPF2     | Isoform 1 c | Tri-methylation | normal |
| IPI001056 | SWISS-PROT | ZFP2     | Zinc finger | Tri-methylation | normal |
| IPI002939 | SWISS-PROT | UBXN4    | UBX doma    | Tri-methylation | normal |
| IPI009221 | TREMBL     | CBWD1    | cDNA FLJ    | Tri-methylation | normal |
| IPI003979 | SWISS-PROT | ZDBF2    | DBF4-type   | Tri-methylation | normal |
| IPI008850 | SWISS-PROT | THAP9    | THAP dom    | Tri-methylation | normal |
| IPI004311 | TREMBL     | AGER     | Uncharacte  | Tri-methylation | normal |
| IPI008884 | SWISS-PROT | DNAH17   | Isoform 1 c | Tri-methylation | normal |
| IPI000217 | SWISS-PROT | TGFB3    | Transformi  | Tri-methylation | normal |
| IPI001425 | SWISS-PROT | SETX     | Isoform 1 c | Tri-methylation | normal |
| IPI008475 | SWISS-PROT | TRANK1   | TPR and a   | Tri-methylation | normal |
| IPI001669 | SWISS-PROT | AIPL1    | Isoform 3 c | Tri-methylation | normal |
| IPI006446 | SWISS-PROT | ZNF469   | Zinc finger | Tri-methylation | normal |
| IPI009473 | TREMBL     | DDX5     | cDNA FLJ    | Tri-methylation | normal |
| IPI000460 | SWISS-PROT | STXBP1   | Isoform 2 c | Tri-methylation | normal |

|           |            |          |              |                 |        |
|-----------|------------|----------|--------------|-----------------|--------|
| IPI000064 | SWISS-PROT | MELK     | Maternal e   | Tri-methylation | normal |
| IPI001575 | SWISS-PROT | NPNT     | Isoform 2 c  | Tri-methylation | normal |
| IPI000032 | SWISS-PROT | ACTBL2   | Beta-actin   | Tri-methylation | normal |
| IPI005497 | SWISS-PROT | NHEJ1    | Isoform 1 c  | Tri-methylation | normal |
| IPI008275 | TREMBL     | -        | VH6DJ pro    | Tri-methylation | normal |
| IPI009101 | TREMBL     | C4orf21  | cDNA FLJ     | Tri-methylation | normal |
| IPI001807 | -          | -        | Similar to E | Tri-methylation | normal |
| IPI001807 | -          | -        | Similar to E | Tri-methylation | normal |
| IPI002955 | SWISS-PROT | WIZ      | Isoform 1 c  | Tri-methylation | normal |
| IPI000195 | SWISS-PROT | MYH9     | Isoform 1 c  | Tri-methylation | normal |
| IPI004534 | SWISS-PROT | HIST2H4E | Histone H4   | Tri-methylation | normal |
| IPI000071 | SWISS-PROT | SLC25A5  | ADP/ATP t    | Tri-methylation | normal |
| IPI002914 | SWISS-PROT | SLC25A6  | ADP/ATP t    | Tri-methylation | normal |
| IPI001781 | TREMBL     | ARHGEF9  | Uncharacte   | Tri-methylation | normal |
| IPI001716 | SWISS-PROT | HIST2H3D | Histone H3   | Tri-methylation | normal |
| IPI001716 | SWISS-PROT | HIST2H3D | Histone H3   | Tri-methylation | normal |
| IPI002955 | SWISS-PROT | WIZ      | Isoform 1 c  | Tri-methylation | normal |
| IPI000071 | SWISS-PROT | SLC25A5  | ADP/ATP t    | Tri-methylation | normal |
| IPI000176 | SWISS-PROT | SMARCE1  | Isoform 1 c  | Tri-methylation | normal |
| IPI002190 | SWISS-PROT | H3F3A;H3 | Histone H3   | Tri-methylation | normal |
| IPI002206 | SWISS-PROT | PKM2     | Isoform M1   | Tri-methylation | normal |
| IPI002914 | SWISS-PROT | SLC25A6  | ADP/ATP t    | Tri-methylation | normal |
| IPI002179 | SWISS-PROT | DST      | Isoform 3 c  | Tri-methylation | normal |
| IPI008533 | TREMBL     | ANK2     | Uncharacte   | Tri-methylation | normal |
| IPI002939 | SWISS-PROT | CDYL     | Isoform 1 c  | Tri-methylation | normal |
| IPI000183 | SWISS-PROT | SETDB1   | Isoform 1 c  | Tri-methylation | normal |
| IPI001807 | -          | -        | Similar to E | Tri-methylation | normal |
| IPI000102 | SWISS-PROT | RAC2     | Ras-relate   | Tri-methylation | normal |
| IPI000084 | SWISS-PROT | SMARCA1  | Isoform 2 c  | Tri-methylation | normal |
| IPI008527 | SWISS-PROT | TTC9     | Tetratricop  | Tri-methylation | normal |
| IPI000124 | SWISS-PROT | SNORD54  | 40S riboso   | Tri-methylation | normal |
| IPI003038 | SWISS-PROT | RTF1     | RNA polym    | Tri-methylation | normal |
| IPI006434 | SWISS-PROT | TACC2    | Isoform 4 c  | Tri-methylation | normal |
| IPI002206 | SWISS-PROT | PKM2     | Isoform M1   | Tri-methylation | normal |
| IPI001716 | SWISS-PROT | HIST2H3D | Histone H3   | Tri-methylation | normal |
| IPI002206 | SWISS-PROT | PKM2     | Isoform M1   | Tri-methylation | normal |
| IPI000025 | SWISS-PROT | DGKB     | Isoform 1 c  | Tri-methylation | normal |
| IPI002202 | SWISS-PROT | TRDN     | Triadin      | Tri-methylation | normal |
| IPI000029 | SWISS-PROT | HSPA4    | Heat shock   | Tri-methylation | normal |
| IPI000223 | SWISS-PROT | RBP3     | Retinol-bin  | Tri-methylation | normal |
| IPI009031 | TREMBL     | ANKRD13  | cDNA FLJ     | Tri-methylation | normal |
| IPI009397 | SWISS-PROT | BIRC6    | Baculovira   | Tri-methylation | normal |
| IPI004555 | TREMBL     | FLJ20464 | Em:AC005     | Tri-methylation | normal |



|            |          |          |              |                  |       |
|------------|----------|----------|--------------|------------------|-------|
| IPI0015114 | Q96J92-1 | WNK4     | Isoform 1 c  | Mono-methylation | Heavy |
| IPI0078875 | B4DYR8;D | ZBTB38   | cDNA FLJ5    | Mono-methylation | Heavy |
| IPI0002143 | P10589   | NR2F1    | COUP tran    | Mono-methylation | Heavy |
| IPI0030462 | Q9C0D4   | ZNF518B  | Zinc finger  | Mono-methylation | Heavy |
| IPI0025686 | Q9UPN3-2 | MACF1    | Isoform 2 c  | Mono-methylation | Heavy |
| IPI0024865 | O60673-1 | REV3L    | Isoform 1 c  | Mono-methylation | Heavy |
| IPI0029085 | Q9Y5Y7   | LYVE1    | Lymphatic    | Mono-methylation | Heavy |
| IPI0021701 | Q6IN85-1 | SMEK1    | Isoform 1 c  | Mono-methylation | Heavy |
| IPI0021701 | Q6IN85-1 | SMEK1    | Isoform 1 c  | Mono-methylation | Heavy |
| IPI0017163 | Q8NEY1-1 | NAV1     | Isoform 1 c  | Mono-methylation | Heavy |
| IPI0085280 | Q9Y2D4-1 | EXOC6B   | Isoform 1 c  | Mono-methylation | Heavy |
| IPI0074471 | Q8TCS8   | PNPT1    | Polyribonu   | Mono-methylation | Heavy |
| IPI0047806 | Q8N7B6-2 | PACRGL   | Isoform 2 c  | Mono-methylation | Heavy |
| IPI0002415 | Q00688   | FKBP3    | Peptidyl-pr  | Mono-methylation | Heavy |
| IPI0001829 | Q13129   | RLF      | Zinc finger  | Mono-methylation | Heavy |
| IPI0000860 | P62736   | ACTA2    | Actin, aorti | Mono-methylation | Heavy |
| IPI0000860 | P62736   | ACTA2    | Actin, aorti | Mono-methylation | Heavy |
| IPI0096603 | D6RBW1   | EIF4E    | Uncharacte   | Mono-methylation | Heavy |
| IPI0090975 | B4E0D9   | ZNF434   | cDNA FLJ5    | Mono-methylation | Heavy |
| IPI0017113 | Q6ZW31-2 | SYDE1    | Isoform 2 c  | Mono-methylation | Heavy |
| IPI0017843 | P46063   | RECQL    | ATP-deper    | Mono-methylation | Heavy |
| IPI0017161 | Q71DI3   | HIST2H3D | Histone H3   | Mono-methylation | Heavy |
| IPI0021903 | P84243   | H3F3A;H3 | Histone H3   | Mono-methylation | Heavy |
| IPI0098071 | -        | RAB2A    | Protein      | Mono-methylation | Heavy |
| IPI0005649 | Q969Q0   | RPL36AL  | 60S riboso   | Mono-methylation | Heavy |
| IPI0029343 | P37108   | SRP14    | Signal recd  | Mono-methylation | Heavy |
| IPI0041068 | Q8IUH5-1 | ZDHHC17  | Isoform 1 c  | Mono-methylation | Heavy |
| IPI0002780 | P30876   | POLR2B   | DNA-direct   | Mono-methylation | Heavy |
| IPI0030134 | Q9NW08   | POLR3B   | DNA-direct   | Mono-methylation | Heavy |
| IPI0010324 | Q8WVW4-  | POF1B    | Isoform 1 c  | Mono-methylation | Heavy |
| IPI0047804 | Q86UD7-1 | TBC1D26  | Isoform 1 c  | Mono-methylation | Heavy |
| IPI0006908 | Q9Y4A5-1 | TRRAP    | Isoform 1 c  | Mono-methylation | Heavy |
| IPI0030528 | Q92878-1 | RAD50    | Isoform 1 c  | Mono-methylation | Heavy |
| IPI0078514 | B3KVR1;G | SNRPN    | cDNA FLJ4    | Mono-methylation | Heavy |
| IPI0014156 | Q8WTW3   | COG1     | Conserved    | Mono-methylation | Heavy |
| IPI0039882 | Q9BQ52-2 | ELAC2    | Isoform 2 c  | Mono-methylation | Heavy |
| IPI0074330 | -        | -        | Similar to B | Mono-methylation | Heavy |
| IPI0005649 | Q969Q0   | RPL36AL  | 60S riboso   | Mono-methylation | Heavy |
| IPI0005649 | Q969Q0   | RPL36AL  | 60S riboso   | Mono-methylation | Heavy |
| IPI0001159 | O43237   | DYNC1LI2 | Cytoplasm    | Mono-methylation | Heavy |
| IPI0002296 | Q8NCY6   | KIAA1826 | Coiled-coil  | Mono-methylation | Heavy |
| IPI0033340 | Q2WGWJ9  | FER1L6   | Fer-1-like g | Mono-methylation | Heavy |
| IPI0029343 | P37108   | SRP14    | Signal recd  | Mono-methylation | Heavy |

|            |          |          |              |                  |       |
|------------|----------|----------|--------------|------------------|-------|
| IPI0039586 | Q16576   | RBBP7    | Histone-bir  | Mono-methylation | Heavy |
| IPI0001519 | P09564   | CD7      | T-cell antig | Mono-methylation | Heavy |
| IPI0001106 | P31327-1 | CPS1     | Isoform 1 c  | Mono-methylation | Heavy |
| IPI0029166 | Q17RB8-1 | LONRF1   | Isoform 1 c  | Mono-methylation | Heavy |
| IPI0045562 | Q6XPR3   | RPTN     | Repetin      | Mono-methylation | Heavy |
| IPI0078486 | Q8IVF4-1 | DNAH10   | Isoform 1 c  | Mono-methylation | Heavy |
| IPI0002353 | B4DT67   | SPATS2L  | cDNA FLJ5    | Mono-methylation | Heavy |
| IPI0102120 | F8VTY5   | MGAT4C   | Uncharacte   | Mono-methylation | Heavy |
| IPI0004521 | Q96RH9   | -        | MUSP1        | Mono-methylation | Heavy |
| IPI0029719 | O60244   | MED14    | Mediator o   | Di-methylation   | Heavy |
| IPI0016740 | Q8N895   | ZNF366   | Zinc finger  | Di-methylation   | Heavy |
| IPI0003279 | O95707   | POP4     | Ribonuclea   | Di-methylation   | Heavy |
| IPI0017940 | Q8N859   | ZNF713   | Zinc finger  | Di-methylation   | Heavy |
| IPI0001442 | Q05639   | EEF1A2   | Elongation   | Di-methylation   | Heavy |
| IPI0016013 | O60494   | CUBN     | Cubilin      | Di-methylation   | Heavy |
| IPI0002334 | Q92794   | KAT6A    | Histone ac   | Di-methylation   | Heavy |
| IPI0017139 | Q9H2A2-1 | ALDH8A1  | Isoform 2 c  | Di-methylation   | Heavy |
| IPI0102513 | -        | -        | 30 kDa pro   | Di-methylation   | Heavy |
| IPI0017161 | Q71DI3   | HIST2H3D | Histone H3   | Di-methylation   | Heavy |
| IPI0041321 | O15131   | KPNA5    | Importin su  | Di-methylation   | Heavy |
| IPI0002003 | P19622   | EN2      | Homeobox     | Di-methylation   | Heavy |
| IPI0098493 | E5RIG4   | NCALD    | Uncharacte   | Di-methylation   | Heavy |
| IPI0074418 | O60239   | SH3BP5   | SH3 doma     | Di-methylation   | Heavy |
| IPI0018073 | -        | -        | Similar to E | Di-methylation   | Heavy |
| IPI0001387 | P23921   | RRM1     | Ribonucleo   | Di-methylation   | Heavy |
| IPI0006491 | Q8TDX5-2 | ACMSD    | Isoform 2 c  | Di-methylation   | Heavy |
| IPI0018073 | -        | -        | Similar to E | Di-methylation   | Heavy |
| IPI0018073 | -        | -        | Similar to E | Di-methylation   | Heavy |
| IPI0088398 | A0AVI2-1 | FER1L5   | Isoform 1 c  | Di-methylation   | Heavy |
| IPI0001602 | Q14332   | FZD2     | Frizzled-2   | Di-methylation   | Heavy |
| IPI0004354 | Q96MZ4   | C4orf39  | Uncharacte   | Tri-methylation  | Heavy |
| IPI0002308 | Q9P2F9   | ZNF319   | Zinc finger  | Tri-methylation  | Heavy |
| IPI0001482 | Q6V1P9-1 | DCHS2    | Isoform 1 c  | Tri-methylation  | Heavy |
| IPI0029550 | O95785-1 | WIZ      | Isoform 1 c  | Tri-methylation  | Heavy |
| IPI0017161 | Q71DI3   | HIST2H3D | H3.2         | Tri-methylation  | Heavy |
| IPI0029146 | P12236   | SLC25A6  | ADP/ATP t    | Tri-methylation  | Heavy |
| IPI0000718 | P05141   | SLC25A5  | ADP/ATP t    | Tri-methylation  | Heavy |
| IPI0000718 | P05141   | SLC25A5  | ADP/ATP t    | Tri-methylation  | Heavy |
| IPI0000718 | P05141   | SLC25A5  | ADP/ATP t    | Tri-methylation  | Heavy |
| IPI0029146 | P12236   | SLC25A6  | ADP/ATP t    | Tri-methylation  | Heavy |

**Table S2: Methylation sites identified in our work.** The positions of methylation sites are the protein sequences in the IPI human database (version 3.87).

| Protein IPI Number | Protein Swiss- | Gene Symbol | Protein Name           | Methylation P |
|--------------------|----------------|-------------|------------------------|---------------|
| IPI00000005        | P01111         | NRAS        | GTPase NRas            | 88            |
| IPI00000051        | O60925         | PFDN1       | Prefoldin subunit 1    | 28            |
| IPI00000070        | P01130         | LDLR        | Low-density lipoprote  | 783           |
| IPI00000861        | Q14847-1       | LASP1       | Isoform 1 of LIM and   | 75            |
| IPI00001714        | Q9Y603-1       | ETV7        | Isoform B of Transcri  | 310           |
| IPI00001753        | Q9Y623         | MYH4        | Myosin-4               | 857           |
| IPI00001753        | Q9Y623         | MYH4        | Myosin-4               | 862           |
| IPI00002127        | Q9P2D7-2       | DNAH1       | Isoform 2 of Dynein h  | 1164          |
| IPI00002135        | Q9Y6A5         | TACC3       | Transforming acidic c  | 51            |
| IPI00002135        | Q9Y6A5         | TACC3       | Transforming acidic c  | 54            |
| IPI00002405        | Q9Y6K5         | OAS3        | 2'-5'-oligoadenylate s | 958           |
| IPI00002590        | Q9Y6T7-1       | DGKB        | Isoform 1 of Diacylgl  | 408           |
| IPI00002590        | Q9Y6T7-1       | DGKB        | Isoform 1 of Diacylgl  | 408           |
| IPI00002853        | Q16537         | PPP2R5E     | Serine/threonine-pro   | 449           |
| IPI00002901        | P28347         | TEAD1       | Transcriptional enhan  | 101           |
| IPI00002946        | P36383         | GJC1        | Gap junction gamma     | 115           |
| IPI00002966        | P34932         | HSPA4       | Heat shock 70 kDa p    | 557           |
| IPI00002966        | P34932         | HSPA4       | Heat shock 70 kDa p    | 559           |
| IPI00003269        | Q562R1         | ACTBL2      | Beta-actin-like protei | 69            |
| IPI00003935        | Q16778         | HIST2H2BE   | Histone H2B type 2-E   | 6             |
| IPI00004362        | Q86VD1         | MORC1       | MORC family CW-ty      | 765           |
| IPI00004671        | Q14789         | GOLGB1      | Golgin subfamily B m   | 323           |
| IPI00004671        | Q14789         | GOLGB1      | Golgin subfamily B m   | 332           |
| IPI00004671        | Q14789         | GOLGB1      | Golgin subfamily B m   | 945           |
| IPI00004671        | Q14789         | GOLGB1      | Golgin subfamily B m   | 1740          |
| IPI00004963        | D6RFZ0         | PIEZO2      | Uncharacterized prof   | 446           |
| IPI00005465        | Q9H2G4         | TSPYL2      | Testis-specific Y-enc  | 407           |
| IPI00005578        | Q9H223         | EHD4        | EH domain-containin    | 319           |
| IPI00005578        | Q9H223         | EHD4        | EH domain-containin    | 327           |
| IPI00005578        | Q9H223         | EHD4        | EH domain-containin    | 330           |
| IPI00005613        | Q01081         | U2AF1       | Splicing factor U2AF   | 39            |
| IPI00005682        | P28845         | HSD11B1     | Corticosteroid 11-bet  | 56            |
| IPI00005704        | O60284         | ST18        | Suppression of tumo    | 38            |
| IPI00006023        | Q9UBR5-2       | CKLF-CMTM1  | Isoform 1 of Chemok    | 18            |
| IPI00006023        | Q9UBR5-2       | CKLF-CMTM1  | Isoform 1 of Chemok    | 22            |
| IPI00006099        | Q14692         | BMS1        | Ribosome biogenesis    | 1144          |
| IPI00006471        | Q14680         | MELK        | Maternal embryonic     | 639           |
| IPI00006471        | Q14680         | MELK        | Maternal embryonic     | 650           |
| IPI00007188        | P05141         | SLC25A5     | ADP/ATP translocase    | 52            |
| IPI00007193        | Q9UPS8-2       | ANKRD26     | Isoform 2 of Ankyrin   | 79            |
| IPI00007928        | Q6P2Q9         | PRPF8       | Pre-mRNA-processin     | 1516          |
| IPI00007928        | Q6P2Q9         | PRPF8       | Pre-mRNA-processin     | 1517          |
| IPI00008422        | Q9H4L7-2       | SMARCAD1    | Isoform 2 of SWI/SN    | 268           |
| IPI00008438        | P46783         | RPS10       | 40S ribosomal protei   | 139           |
| IPI00008575        | Q07666-1       | KHDRBS1     | Isoform 1 of KH dom    | 194           |
| IPI00008575        | Q07666-1       | KHDRBS1     | Isoform 1 of KH dom    | 200           |
| IPI00008603        | P62736         | ACTA2       | Actin, aortic smooth   | 52            |
| IPI00008708        | O76021         | RSL1D1      | Ribosomal L1 domai     | 116           |
| IPI00008708        | O76021         | RSL1D1      | Ribosomal L1 domai     | 120           |

|             |          |          |                                                                  |      |
|-------------|----------|----------|------------------------------------------------------------------|------|
| IPI00008708 | O76021   | RSL1D1   | Ribosomal L1 domain                                              | 124  |
| IPI00008934 | P54868   | HMGCS2   | Hydroxymethylglutarate synthase                                  | 276  |
| IPI00009316 | Q9UNP9-1 | PPIE     | Isoform A of Peptidyl isomerase                                  | 254  |
| IPI00009367 | P21549   | AGXT     | Serine--pyruvate aminotransferase                                | 228  |
| IPI00009464 | Q01780-1 | EXOSC10  | Isoform 1 of Exosome                                             | 835  |
| IPI00009685 | Q7Z5H3-2 | ARHGAP22 | Isoform 2 of Rho GTPase-activating protein                       | 664  |
| IPI00009736 | P48443   | RXRG     | Retinoic acid receptor gamma                                     | 10   |
| IPI00009790 | Q01813   | PFKP     | 6-phosphofructokinase                                            | 109  |
| IPI00009802 | P13611-1 | VCAN     | Isoform V0 of Versican                                           | 2238 |
| IPI00010069 | Q9BRR0   | ZKSCAN3  | Zinc finger protein with multiple LIM domains                    | 82   |
| IPI00010158 | Q9NRG0   | CHRAC1   | Chromatin accessibility factor 1                                 | 105  |
| IPI00010158 | Q9NRG0   | CHRAC1   | Chromatin accessibility factor 1                                 | 108  |
| IPI00010208 | Q9NPI7   | KRCC1    | Lysine-rich coiled-coil domain-containing protein 1              | 237  |
| IPI00010270 | P15153   | RAC2     | Ras-related C3 botulinum toxin substrate 2                       | 123  |
| IPI00010270 | P15153   | RAC2     | Ras-related C3 botulinum toxin substrate 2                       | 130  |
| IPI00010368 | O00139-1 | KIF2A    | Uncharacterized protein                                          | 141  |
| IPI00010368 | O00139-1 | KIF2A    | Uncharacterized protein                                          | 149  |
| IPI00010590 | Q9NRZ9-1 | HELLS    | Isoform 1 of Lymphocyte cytoskeleton-associated protein          | 569  |
| IPI00010604 | Q9P212-1 | PLCE1    | Isoform 1 of 1-phosphatidylinositol 3-kinase                     | 1541 |
| IPI00010604 | Q9P212-1 | PLCE1    | Isoform 1 of 1-phosphatidylinositol 3-kinase                     | 1555 |
| IPI00010851 | P21854   | CD72     | B-cell differentiation antigen CD72                              | 196  |
| IPI00011062 | P31327-1 | CPS1     | Isoform 1 of Carbamoyl phosphate synthase                        | 772  |
| IPI00011274 | O14979-1 | HNRPDL   | Isoform 1 of Heterogeneous nuclear ribonucleoprotein D-like      | 161  |
| IPI00011592 | O43237   | DYNC1LI2 | Cytoplasmic dynein 1 light chain 2                               | 55   |
| IPI00011644 | P23469-1 | PTPRE    | Receptor-type tyrosine kinase                                    | 237  |
| IPI00011644 | P23469-1 | PTPRE    | Receptor-type tyrosine kinase                                    | 248  |
| IPI00011933 | O43303-1 | CCP110   | Isoform 1 of Centriole-associated protein                        | 821  |
| IPI00011957 | P23508-1 | MCC      | Isoform 1 of Colorectal cancer-associated protein                | 260  |
| IPI00012074 | O43390-1 | HNRNPR   | Isoform 1 of Heterogeneous nuclear ribonucleoprotein R           | 235  |
| IPI00012322 | Q13237   | PRKG2    | cGMP-dependent protein kinase II                                 | 521  |
| IPI00012331 | Q9UPQ4-1 | TRIM35   | Isoform 1 of Tripartite motif domain-containing protein          | 138  |
| IPI00012442 | Q13283   | G3BP1    | Ras GTPase-activating protein 1                                  | 5    |
| IPI00012493 | P60866   | SNORD54  | 40S ribosomal protein S24                                        | 8    |
| IPI00012851 | O43520   | ATP8B1   | Probable phospholipase                                           | 60   |
| IPI00012868 | B9ZVW1   | ZNF211   | zinc finger protein 211                                          | 361  |
| IPI00012913 | B2R9J9   | SPRY2    | Uncharacterized protein                                          | 78   |
| IPI00013164 | P41219-1 | PRPH     | Isoform 1 of Peripheral protein                                  | 98   |
| IPI00013449 | O43657   | TSPAN6   | Tetraspanin-6                                                    | 123  |
| IPI00013871 | P23921   | RRM1     | Ribonucleoside-diphosphate reductase                             | 320  |
| IPI00014255 | Q15051-1 | IQCB1    | Isoform 1 of IQ motif-containing protein                         | 331  |
| IPI00014424 | Q05639   | EEF1A2   | Elongation factor 1-alpha                                        | 55   |
| IPI00014424 | Q05639   | EEF1A2   | Elongation factor 1-alpha                                        | 79   |
| IPI00014424 | Q05639   | EEF1A2   | Elongation factor 1-alpha                                        | 79   |
| IPI00014424 | Q05639   | EEF1A2   | Elongation factor 1-alpha                                        | 84   |
| IPI00014424 | Q05639   | EEF1A2   | Elongation factor 1-alpha                                        | 165  |
| IPI00014829 | Q6V1P9-1 | DCHS2    | Isoform 1 of Protocadherin                                       | 2747 |
| IPI00015199 | P09564   | CD7      | T-cell antigen CD7                                               | 214  |
| IPI00015444 | Q6UY01-2 | LRRC31   | Isoform 2 of Leucine-rich repeat-containing protein              | 455  |
| IPI00015963 | O75762   | TRPA1    | Transient receptor potential cation channel subfamily A member 1 | 503  |
| IPI00015963 | O75762   | TRPA1    | Transient receptor potential cation channel subfamily A member 1 | 504  |
| IPI00016027 | Q14332   | FZD2     | Frizzled-2                                                       | 446  |
| IPI00016814 | Q9BS34   | ZNF670   | Zinc finger protein 670                                          | 204  |

|             |          |             |                         |      |
|-------------|----------|-------------|-------------------------|------|
| IPI00017334 | P35232   | PHB         | Prohibitin              | 4    |
| IPI00017334 | P35232   | PHB         | Prohibitin              | 11   |
| IPI00017580 | O60870   | KIN         | DNA/RNA-binding pr      | 302  |
| IPI00017580 | O60870   | KIN         | DNA/RNA-binding pr      | 306  |
| IPI00017619 | Q9UL16   | CCDC19      | Coiled-coil domain-c    | 431  |
| IPI00017669 | Q969G3-1 | SMARCE1     | Isoform 1 of SWI/SN     | 3    |
| IPI00017745 | Q99727   | TIMP4       | Metalloproteinase int   | 86   |
| IPI00018140 | O60506-1 | SYNCRIP     | Isoform 1 of Heterog    | 213  |
| IPI00018152 | Q15559   | NONO        | clone tec14 (Fragme     | 28   |
| IPI00018152 | Q15559   | NONO        | clone tec14 (Fragme     | 29   |
| IPI00018152 | Q15559   | NONO        | clone tec14 (Fragme     | 29   |
| IPI00018294 | Q13129   | RLF         | Zinc finger protein RL  | 1470 |
| IPI00018321 | Q15047-1 | SETDB1      | Isoform 1 of Histone-   | 490  |
| IPI00018335 | P17948-1 | FLT1        | Isoform Flt1 of Vascu   | 1153 |
| IPI00018798 | Q9NVM6   | DNAJC17     | DnaJ homolog subfa      | 5    |
| IPI00018798 | Q9NVM6   | DNAJC17     | DnaJ homolog subfa      | 25   |
| IPI00018808 | Q9HCM1   | C12orf35    | Uncharacterized prot    | 1429 |
| IPI00019223 | Q99996-1 | AKAP9       | Isoform 1 of A-kinase   | 9    |
| IPI00019329 | P63167   | DYNLL1      | Dynein light chain 1,   | 49   |
| IPI00019439 | P35556-1 | FBN2        | Isoform 1 of Fibrillin- | 2861 |
| IPI00019439 | P35556-1 | FBN2        | Isoform 1 of Fibrillin- | 2879 |
| IPI00019502 | P35579-1 | MYH9        | Isoform 1 of Myosin-    | 8    |
| IPI00020031 | P19622   | EN2         | Homeobox protein en     | 245  |
| IPI00020088 | Q9NPH9   | IL26        | Interleukin-26          | 62   |
| IPI00020557 | Q07954   | LRP1        | Prolow-density lipopr   | 458  |
| IPI00020755 | Q9P1N6   | C14orf91    | Putative uncharacter    | 51   |
| IPI00020900 | P51814-1 | ZNF41       | Isoform 1 of Zinc fing  | 656  |
| IPI00021076 | Q99569-1 | PKP4        | Plakophilin-4           | 982  |
| IPI00021263 | P63104   | YWHAZ       | 2014-3-3 protein zeta   | 212  |
| IPI00021391 | Q92478   | CLEC2B      | C-type lectin domain    | 146  |
| IPI00021431 | P10589   | NR2F1       | COUP transcription f    | 148  |
| IPI00021439 | P60709   | ACTB        | Actin, cytoplasmic 1    | 68   |
| IPI00021780 | P10600   | TGFB3       | Transforming growth     | 162  |
| IPI00021812 | Q09666   | AHNAK       | Neuroblast differentia  | 2257 |
| IPI00021812 | Q09666   | AHNAK       | Neuroblast differentia  | 4074 |
| IPI00021812 | Q09666   | AHNAK       | Neuroblast differentia  | 4128 |
| IPI00021812 | Q09666   | AHNAK       | Neuroblast differentia  | 4139 |
| IPI00021812 | Q09666   | AHNAK       | Neuroblast differentia  | 4592 |
| IPI00021812 | Q09666   | AHNAK       | Neuroblast differentia  | 4603 |
| IPI00021998 | O95256   | IL18RAP     | Interleukin-18 recept   | 554  |
| IPI00022225 | Q8WUQ7-2 | C19orf29    | Isoform 2 of Unchara    | 151  |
| IPI00022225 | Q8WUQ7-2 | C19orf29    | Isoform 2 of Unchara    | 158  |
| IPI00022228 | Q00341   | HDLBP       | Vigilin                 | 892  |
| IPI00022337 | P10745   | RBP3        | Retinol-binding prote   | 1070 |
| IPI00022652 | Q9UH03-3 | 3-Sep       | Isoform 3 of Neurona    | 30   |
| IPI00022933 | P04233-1 | CD74        | Isoform 1 of HLA clas   | 96   |
| IPI00022933 | P04233-1 | CD74        | Isoform 1 of HLA clas   | 99   |
| IPI00022967 | Q8NCY6   | KIAA1826    | Coiled-coil domain-c    | 90   |
| IPI00022967 | Q8NCY6   | KIAA1826    | Coiled-coil domain-c    | 114  |
| IPI00022967 | Q8NCY6   | KIAA1826    | Coiled-coil domain-c    | 297  |
| IPI00023084 | Q9P2F9   | ZNF319      | Zinc finger protein 31  | 496  |
| IPI00023149 | O14662-1 | STX16-NPEPL | Isoform B of Syntaxin   | 97   |

|             |          |            |                         |       |
|-------------|----------|------------|-------------------------|-------|
| IPI00023186 | O75674   | TOM1L1     | TOM1-like protein 1     | 298   |
| IPI00023217 | Q92736-1 | RYR2       | Isoform 1 of Ryanodi    | 2136  |
| IPI00023217 | Q92736-1 | RYR2       | Isoform 1 of Ryanodi    | 2140  |
| IPI00023234 | Q9UBT2   | UBA2       | SUMO-activating enz     | 271   |
| IPI00023283 | Q8WZ42-2 | TTN        | Isoform 2 of Titin      | 27939 |
| IPI00023283 | Q8WZ42-2 | TTN        | Isoform 2 of Titin      | 27942 |
| IPI00023340 | Q92794   | KAT6A      | Histone acetyltransfe   | 1330  |
| IPI00023532 | B4DT67   | SPATS2L    | cDNA FLJ59751, we       | 375   |
| IPI00023625 | P63215   | GNG3       | Guanine nucleotide-t    | 24    |
| IPI00024157 | Q00688   | FKBP3      | Peptidyl-prolyl cis-tra | 187   |
| IPI00024368 | O75110-1 | ATP9A      | Isoform Long of Prob    | 14    |
| IPI00024650 | P53985   | SLC16A1    | Monocarboxylate tra     | 494   |
| IPI00025864 | P06276   | BCHE       | Butyrylcholinesterase   | 477   |
| IPI00025864 | P06276   | BCHE       | Butyrylcholinesterase   | 496   |
| IPI00025890 | Q14CX7-1 | NAA25      | Isoform 1 of N-alpha    | 219   |
| IPI00026230 | P55795   | HNRNPH2    | Heterogeneous nucle     | 98    |
| IPI00026606 | O75683   | SURF6      | Surfeit locus protein   | 149   |
| IPI00027434 | P08134   | RHOC       | Rho-related GTP-bin     | 119   |
| IPI00027681 | P40261   | NNMT       | Nicotinamide N-meth     | 8     |
| IPI00027725 | P49662   | CASP4      | Caspase-4               | 49    |
| IPI00027725 | P49662   | CASP4      | Caspase-4               | 53    |
| IPI00027808 | P30876   | POLR2B     | DNA-directed RNA p      | 1052  |
| IPI00028213 | O95025   | SEMA3D     | Semaphorin-3D           | 758   |
| IPI00028213 | O95025   | SEMA3D     | Semaphorin-3D           | 759   |
| IPI00028564 | P32455   | GBP1       | Interferon-induced gu   | 544   |
| IPI00028579 | P49848-1 | TAF6       | Isoform 1 of Transcri   | 287   |
| IPI00028928 | Q14123-1 | PDE1C      | Isoform PDE1C2 of C     | 695   |
| IPI00029012 | Q14152   | EIF3A      | Eukaryotic translatio   | 632   |
| IPI00029012 | Q14152   | EIF3A      | Eukaryotic translatio   | 633   |
| IPI00029012 | Q14152   | EIF3A      | Eukaryotic translatio   | 634   |
| IPI00029050 | O95461-1 | LARGE      | Isoform 1 of Glycosy    | 728   |
| IPI00029768 | Q12879   | GRIN2A     | Glutamate [NMDA] re     | 880   |
| IPI00030098 | Q14320   | FAM50A     | Protein FAM50A          | 95    |
| IPI00030397 | Q12981-1 | BNIP1      | Isoform 3 of Vesicle t  | 48    |
| IPI00030397 | Q12981-1 | BNIP1      | Isoform 3 of Vesicle t  | 50    |
| IPI00031521 | P40938   | RFC3       | Replication factor C s  | 7     |
| IPI00031534 | Q9NSC7   | ST6GALNAC1 | Alpha-N-acetylgalact    | 227   |
| IPI00032162 | Q08050-1 | FOXM1      | Isoform 1 of Forkhea    | 278   |
| IPI00032162 | Q08050-1 | FOXM1      | Isoform 1 of Forkhea    | 282   |
| IPI00032791 | O95707   | POP4       | Ribonuclease P prote    | 36    |
| IPI00032956 | Q9NQZ6-1 | ZC4H2      | Isoform 1 of Zinc fing  | 20    |
| IPI00032956 | Q9NQZ6-1 | ZC4H2      | Isoform 1 of Zinc fing  | 28    |
| IPI00034006 | Q9H3S7   | PTPN23     | Tyrosine-protein pho    | 608   |
| IPI00034006 | Q9H3S7   | PTPN23     | Tyrosine-protein pho    | 613   |
| IPI00034201 | Q9C0B7   | TMCO7      | Transmembrane and       | 63    |
| IPI00036578 | P58397-1 | ADAMTS12   | Isoform 1 of A disinte  | 536   |
| IPI00043543 | Q96MZ4   | C4orf39    | Uncharacterized prof    | 32    |
| IPI00043740 | Q96NL6-1 | SCLT1      | Isoform 1 of Sodium     | 445   |
| IPI00043978 | Q8TEW8-1 | PARD3B     | Isoform 1 of Partitio   | 869   |
| IPI00043978 | Q8TEW8-1 | PARD3B     | Isoform 1 of Partitio   | 870   |
| IPI00044214 | P16471-4 | PRLR       | Isoform 4 of Prolactir  | 357   |
| IPI00044214 | P16471-4 | PRLR       | Isoform 4 of Prolactir  | 369   |

|             |          |          |                        |      |
|-------------|----------|----------|------------------------|------|
| IPI00044748 | Q96PY5-3 | FMNL2    | Similar to FMNL2       | 453  |
| IPI00044748 | Q96PY5-3 | FMNL2    | Similar to FMNL2       | 456  |
| IPI00044748 | Q96PY5-3 | FMNL2    | Similar to FMNL2       | 458  |
| IPI00045279 | Q96RH9   | -        | MUSP1                  | 75   |
| IPI00046057 | P61764-2 | STXBP1   | Isoform 2 of Syntaxin  | 321  |
| IPI00056494 | Q969Q0   | RPL36AL  | 60S ribosomal protein  | 53   |
| IPI00059955 | Q6UX07-1 | DHRS13   | Isoform 1 of Dehydro   | 50   |
| IPI00064913 | Q8TDX5-2 | ACMSD    | Isoform 2 of 2-amino   | 198  |
| IPI00065918 | Q96P56-1 | CATSPER2 | Isoform 1 of Cation c  | 54   |
| IPI00069084 | Q9Y4A5-1 | TRRAP    | Isoform 1 of Transfor  | 1691 |
| IPI00069084 | Q9Y4A5-1 | TRRAP    | Isoform 1 of Transfor  | 2405 |
| IPI00069524 | Q96BT1   | C3orf49  | Putative uncharacter   | 97   |
| IPI00101923 | Q96J17-1 | SPG11    | Isoform 1 of Spatacs   | 2182 |
| IPI00101927 | Q9BRK4   | LZTS2    | Leucine zipper putati  | 607  |
| IPI00102377 | Q96NW4   | ANKRD27  | Ankyrin repeat doma    | 626  |
| IPI00103242 | Q8WVV4-1 | POF1B    | Isoform 1 of Protein I | 138  |
| IPI00103597 | Q8WY21-1 | SORCS1   | Isoform 1 of VPS10 c   | 700  |
| IPI00103597 | Q8WY21-1 | SORCS1   | Isoform 1 of VPS10 c   | 702  |
| IPI00105638 | Q6ZN57   | ZFP2     | Zinc finger protein 2  | 299  |
| IPI00107486 | O96028-3 | WHSC1    | Isoform 3 of Probable  | 443  |
| IPI00141561 | Q8WTW3   | COG1     | Conserved oligomeri    | 377  |
| IPI00142538 | Q7Z333-1 | SETX     | Isoform 1 of Probable  | 2027 |
| IPI00142716 | Q5F1R6-1 | DNAJC21  | Isoform 1 of DnaJ ho   | 2    |
| IPI00148768 | Q9H2D6-5 | TRIOBP   | TRIO and F-actin-bin   | 476  |
| IPI00151141 | Q96J92-1 | WNK4     | Isoform 1 of Serine/th | 226  |
| IPI00151170 | P33981   | TTK      | Dual specificity prote | 19   |
| IPI00151366 | Q9BX84-1 | TRPM6    | Isoform TRPM6a of T    | 14   |
| IPI00157556 | Q6UXI9-2 | NPNT     | Isoform 2 of Nephron   | 96   |
| IPI00158157 | Q12986-2 | NFX1     | Isoform 2 of Transcri  | 292  |
| IPI00160130 | O60494   | CUBN     | Cubilin                | 1909 |
| IPI00163659 | Q8NG31-3 | CASC5    | Isoform 3 of Protein C | 1644 |
| IPI00164066 | Q96JN2-4 | CCDC136  | Isoform 4 of Coiled-c  | 520  |
| IPI00164930 | Q2M389-2 | KIAA1033 | Isoform 2 of WASH c    | 29   |
| IPI00164930 | Q2M389-2 | KIAA1033 | Isoform 2 of WASH c    | 33   |
| IPI00165454 | Q8WVS4   | WDR60    | WD repeat-containin    | 487  |
| IPI00166974 | Q9NZN9-3 | AIPL1    | Isoform 3 of Aryl-hyd  | 236  |
| IPI00167408 | Q8N895   | ZNF366   | Zinc finger protein 36 | 316  |
| IPI00168165 | E7ERI8   | CLASP2   | Uncharacterized prot   | 1297 |
| IPI00168347 | Q96CP6-3 | GRAMD1A  | Isoform 3 of GRAM c    | 535  |
| IPI00168347 | Q96CP6-3 | GRAMD1A  | Isoform 3 of GRAM c    | 543  |
| IPI00168931 | Q6IEX5   | OR4H12P  | Uncharacterized prot   | 283  |
| IPI00168931 | Q6IEX5   | OR4H12P  | Uncharacterized prot   | 287  |
| IPI00171123 | Q8WUU5   | GATAD1   | GATA zinc finger dom   | 6    |
| IPI00171123 | Q8WUU5   | GATAD1   | GATA zinc finger dom   | 21   |
| IPI00171137 | Q6ZW31-2 | SYDE1    | Isoform 2 of Rho GT    | 105  |
| IPI00171391 | Q9H2A2-1 | ALDH8A1  | Isoform 2 of Aldehyd   | 437  |
| IPI00171438 | Q8NBS9   | TXNDC5   | Thioredoxin domain-    | 221  |
| IPI00171611 | Q71DI3   | HIST2H3D | Histone H3.2           | 28   |
| IPI00171611 | Q71DI3   | HIST2H3D | Histone H3.2           | 28   |
| IPI00171611 | Q71DI3   | HIST2H3D | Histone H3.2           | 28   |
| IPI00171611 | Q71DI3   | HIST2H3D | Histone H3.2           | 37   |
| IPI00171611 | Q71DI3   | HIST2H3D | Histone H3.2           | 37   |

|             |          |          |                        |      |
|-------------|----------|----------|------------------------|------|
| IPI00171611 | Q71DI3   | HIST2H3D | Histone H3.2           | 38   |
| IPI00171611 | Q71DI3   | HIST2H3D | Histone H3.2           | 38   |
| IPI00171636 | Q8NEY1-1 | NAV1     | Isoform 1 of Neuron    | 1317 |
| IPI00171636 | Q8NEY1-1 | NAV1     | Isoform 1 of Neuron    | 1320 |
| IPI00171768 | Q8NI77   | KIF18A   | Kinesin-like protein k | 517  |
| IPI00171768 | Q8NI77   | KIF18A   | Kinesin-like protein k | 534  |
| IPI00173346 | Q6PCE3   | PGM2L1   | Glucose 1,6-bisphos    | 501  |
| IPI00174391 | B4DYI2   | FAM75C2  | hypothetical protein l | 863  |
| IPI00174885 | O75290-1 | ZNF780A  | Isoform 1 of Zinc fing | 521  |
| IPI00174885 | O75290-1 | ZNF780A  | Isoform 1 of Zinc fing | 527  |
| IPI00177888 | Q96PV6-1 | LENG8    | Uncharacterized prot   | 248  |
| IPI00177888 | Q96PV6-1 | LENG8    | Uncharacterized prot   | 257  |
| IPI00178151 | B1AMR4   | ARHGEF9  | Uncharacterized prot   | 129  |
| IPI00178431 | P46063   | RECQL    | ATP-dependent DNA      | 88   |
| IPI00178431 | P46063   | RECQL    | ATP-dependent DNA      | 91   |
| IPI00178431 | P46063   | RECQL    | ATP-dependent DNA      | 487  |
| IPI00179019 | Q9NZE8-1 | MRPL35   | Isoform 1 of 39S ribo  | 160  |
| IPI00179405 | Q8N859   | ZNF713   | Zinc finger protein 71 | 411  |
| IPI00179751 | Q6W3E5-1 | GDPD4    | Isoform 1 of Glycerol  | 296  |
| IPI00179751 | Q6W3E5-1 | GDPD4    | Isoform 1 of Glycerol  | 303  |
| IPI00180730 | -        | -        | Similar to Elongation  | 55   |
| IPI00180730 | -        | -        | Similar to Elongation  | 79   |
| IPI00180730 | -        | -        | Similar to Elongation  | 79   |
| IPI00180730 | -        | -        | Similar to Elongation  | 165  |
| IPI00180764 | O95251   | KAT7     | Histone acetyltransfe  | 376  |
| IPI00181135 | B3KSI3   | BCAT2    | Branched-chain-amir    | 4    |
| IPI00181997 | Q6P1Q9-2 | METTL2B  | Isoform 2 of Methyltr  | 48   |
| IPI00185661 | Q8NFA0   | USP32    | Ubiquitin carboxyl-ter | 274  |
| IPI00215715 | Q9UQM7-1 | CAMK2A   | Isoform A of Calcium   | 258  |
| IPI00215777 | Q00325-2 | SLC25A3  | Isoform B of Phospho   | 89   |
| IPI00215965 | P09651-1 | HNRNPA1  | Isoform A1-B of Hete   | 161  |
| IPI00216890 | Q8IUW5   | RELL1    | RELT-like protein 1    | 240  |
| IPI00217013 | Q6IN85-1 | SMEK1    | Isoform 1 of Serine/tl | 655  |
| IPI00217146 | Q8IW52   | SLITRK4  | SLIT and NTRK-like     | 792  |
| IPI00217146 | Q8IW52   | SLITRK4  | SLIT and NTRK-like     | 801  |
| IPI00217343 | Q8IX05   | CD302    | CD302 antigen          | 140  |
| IPI00217992 | Q03001-3 | DST      | Isoform 3 of Dystonir  | 1554 |
| IPI00218192 | Q14624-2 | ITIH4    | Isoform 2 of Inter-alp | 815  |
| IPI00218192 | Q14624-2 | ITIH4    | Isoform 2 of Inter-alp | 826  |
| IPI00218725 | -        | LAMA2    | laminin subunit alpha  | 1943 |
| IPI00218730 | P16499   | PDE6A    | Rod cGMP-specific 3    | 84   |
| IPI00218823 | Q9UMN6-1 | MLL4     | Isoform 1 of Histone-  | 1866 |
| IPI00219038 | P84243   | H3F3A    | Histone H3.3           | 28   |
| IPI00219038 | P84243   | H3F3A    | Histone H3.3           | 28   |
| IPI00219038 | P84243   | H3F3A    | Histone H3.3           | 37   |
| IPI00219335 | Q92901   | RPL3L    | 60S ribosomal protei   | 250  |
| IPI00219689 | Q9UKW4-2 | VAV3     | Isoform 2 of Guanine   | 641  |
| IPI00219689 | Q9UKW4-2 | VAV3     | Isoform 2 of Guanine   | 643  |
| IPI00220272 | Q13061   | TRDN     | Triadin                | 625  |
| IPI00220396 | Q16816   | PHKG1    | PHKG1 protein          | 307  |
| IPI00220644 | P14618-2 | PKM2     | Isoform M1 of Pyruva   | 3    |
| IPI00221209 | P32856-2 | STX2     | Isoform 1 of Syntaxir  | 55   |



|             |          |          |                        |      |
|-------------|----------|----------|------------------------|------|
| IPI00221209 | P32856-2 | STX2     | Isoform 1 of Syntaxin  | 71   |
| IPI00221209 | P32856-2 | STX2     | Isoform 1 of Syntaxin  | 125  |
| IPI00234154 | A6NEL2   | ANKRD56  | Ankyrin repeat doma    | 434  |
| IPI00235842 | Q8TF39   | ZNF483   | Zinc finger protein 48 | 336  |
| IPI00235842 | Q8TF39   | ZNF483   | Zinc finger protein 48 | 337  |
| IPI00235842 | Q8TF39   | ZNF483   | Zinc finger protein 48 | 350  |
| IPI00235842 | Q8TF39   | ZNF483   | Zinc finger protein 48 | 352  |
| IPI00247295 | Q8NF91-4 | SYNE1    | Isoform 4 of Nesprin-  | 4262 |
| IPI00248651 | O60673-1 | REV3L    | Isoform 1 of DNA pol   | 2868 |
| IPI00256861 | Q9UPN3-2 | MACF1    | Isoform 2 of Microtub  | 4202 |
| IPI00289034 | Q8TEK3-1 | DOT1L    | Isoform 2 of Histone-  | 1359 |
| IPI00290856 | Q9Y5Y7   | LYVE1    | Lymphatic vessel end   | 298  |
| IPI00291215 | Q460N5-6 | PARP14   | Isoform 6 of Poly [AD  | 399  |
| IPI00291278 | Q8TCB0   | IFI44    | Interferon-induced pr  | 443  |
| IPI00291467 | P12236   | SLC25A6  | ADP/ATP translocase    | 52   |
| IPI00291662 | Q17RB8-1 | LONRF1   | Isoform 1 of LON pe    | 203  |
| IPI00291796 | Q8IY92-1 | SLX4     | Isoform 1 of Structur  | 404  |
| IPI00291796 | Q8IY92-1 | SLX4     | Isoform 1 of Structur  | 405  |
| IPI00292326 | Q07617   | SPAG1    | Sperm-associated ar    | 705  |
| IPI00292326 | Q07617   | SPAG1    | Sperm-associated ar    | 709  |
| IPI00292975 | Q9P2N5   | RBM27    | RNA-binding protein    | 734  |
| IPI00293434 | P37108   | SRP14    | Signal recognition pa  | 105  |
| IPI00293434 | P37108   | SRP14    | Signal recognition pa  | 107  |
| IPI00293845 | Q5UIP0-1 | RIF1     | Isoform 1 of Telomer   | 519  |
| IPI00293845 | Q5UIP0-1 | RIF1     | Isoform 1 of Telomer   | 521  |
| IPI00293845 | Q5UIP0-1 | RIF1     | Isoform 1 of Telomer   | 2367 |
| IPI00293867 | P30046   | DDT      | D-dopachrome deca      | 110  |
| IPI00293946 | Q92575   | UBXN4    | UBX domain-contain     | 301  |
| IPI00293963 | Q9Y232-1 | CDYL     | Isoform 1 of Chromo    | 157  |
| IPI00294680 | Q9Y448-1 | C15orf23 | Isoform 1 of Putative  | 268  |
| IPI00295022 | P30414   | NKTR     | NK-tumor recognitior   | 637  |
| IPI00295022 | P30414   | NKTR     | NK-tumor recognitior   | 639  |
| IPI00295502 | O95785-1 | WIZ      | Isoform 1 of Protein Y | 1112 |
| IPI00295502 | O95785-1 | WIZ      | Isoform 1 of Protein Y | 1162 |
| IPI00297191 | O60244   | MED14    | Mediator of RNA poly   | 399  |
| IPI00297407 | Q5BKX6-3 | SLC45A4  | Isoform 3 of Solute c  | 745  |
| IPI00297407 | Q5BKX6-3 | SLC45A4  | Isoform 3 of Solute c  | 746  |
| IPI00297477 | P09661   | SNRPA1   | U2 small nuclear ribc  | 172  |
| IPI00297859 | O14686-1 | MLL2     | Isoform 1 of Histone-  | 5024 |
| IPI00298007 | Q8N884-1 | MB21D1   | Isoform 1 of Protein I | 301  |
| IPI00298285 | P21860-1 | ERBB3    | Isoform 1 of Recepto   | 736  |
| IPI00298306 | Q13315   | ATM      | Serine-protein kinase  | 2643 |
| IPI00298738 | O00411   | POLRMT   | Similar to DNA-direc   | 43   |
| IPI00299679 | Q9NZL6-2 | RGL1     | Isoform B of Ral gua   | 17   |
| IPI00299679 | Q9NZL6-2 | RGL1     | Isoform B of Ral gua   | 21   |
| IPI00300078 | Q15269   | PWP2     | Periodic tryptophan p  | 691  |
| IPI00300504 | Q9HAU5-1 | UPF2     | Isoform 1 of Regulat   | 58   |
| IPI00301283 | Q9UKB1-3 | FBXW11   | Isoform B of F-box/W   | 166  |
| IPI00301346 | Q9NW08   | POLR3B   | DNA-directed RNA p     | 1013 |
| IPI00303335 | P20929   | NEB      | Nebulin                | 4535 |
| IPI00303335 | P20929   | NEB      | Nebulin                | 4541 |
| IPI00303832 | Q92541   | RTF1     | RNA polymerase-ass     | 44   |

|             |          |          |                        |      |
|-------------|----------|----------|------------------------|------|
| IPI00304621 | Q9C0D4   | ZNF518B  | Zinc finger protein 51 | 282  |
| IPI00305282 | Q92878-1 | RAD50    | Isoform 1 of DNA rep   | 20   |
| IPI00305822 | Q96HE9   | PRR11    | Proline-rich protein 1 | 212  |
| IPI00305822 | Q96HE9   | PRR11    | Proline-rich protein 1 | 220  |
| IPI00306446 | P17028-1 | ZNF24    | Isoform 1 of Zinc fing | 361  |
| IPI00306853 | Q7LGC8   | CHST3    | Carbohydrate sulfotr   | 273  |
| IPI00307317 | Q32M84-2 | BTBD16   | Isoform 2 of BTB/PO    | 289  |
| IPI00329306 | Q7RTS7   | KRT74    | Keratin, type II cytos | 145  |
| IPI00329497 | O95803-1 | NDST3    | Isoform 1 of Bifunctio | 123  |
| IPI00329497 | O95803-1 | NDST3    | Isoform 1 of Bifunctio | 125  |
| IPI00329536 | Q15075   | EEA1     | Early endosome anti    | 848  |
| IPI00333405 | Q2WVGJ9  | FER1L6   | Fer-1-like protein 6   | 130  |
| IPI00334336 | A6NCS9   | SDCCAG8  | Uncharacterized prot   | 250  |
| IPI00334336 | A6NCS9   | SDCCAG8  | Uncharacterized prot   | 254  |
| IPI00335581 | Q6ZT12-1 | UBR3     | Isoform 1 of E3 ubiqu  | 1424 |
| IPI00337642 | Q5VZI3-3 | C9orf91  | Isoform 3 of Transme   | 159  |
| IPI00339269 | P17066   | HSPA6    | Heat shock 70 kDa p    | 142  |
| IPI00373926 | Q8NA69   | C19orf45 | Uncharacterized prot   | 226  |
| IPI00375294 | P25391   | LAMA1    | Laminin subunit alph   | 2479 |
| IPI00375560 | Q7Z570   | ZNF804A  | Zinc finger protein 80 | 772  |
| IPI00376874 | Q8N5R6-1 | CCDC33   | Uncharacterized prot   | 369  |
| IPI00376955 | Q00537   | CDK17    | Cyclin-dependent kin   | 328  |
| IPI00382470 | P07900-2 | HSP90AA1 | Isoform 2 of Heat sho  | 635  |
| IPI00382470 | P07900-2 | HSP90AA1 | Isoform 2 of Heat sho  | 737  |
| IPI00382557 | Q96P23   | PNKD     | Myofibrillogenesis re  | 99   |
| IPI00383105 | Q3L8U1-1 | CHD9     | Isoform 1 of Chromo    | 738  |
| IPI00383888 | Q5T1A1-2 | DCST2    | Isoform 2 of DC-STA    | 3    |
| IPI00383888 | Q5T1A1-2 | DCST2    | Isoform 2 of DC-STA    | 6    |
| IPI00384419 | Q8NDG6-1 | TDRD9    | Isoform 1 of Putative  | 1168 |
| IPI00384444 | P02533   | KRT14    | Keratin, type I cytosk | 243  |
| IPI00384668 | Q5XXA6-3 | ANO1     | Isoform 3 of Anoctan   | 76   |
| IPI00385065 | Q8N8E3-1 | CEP112   | Isoform 1 of Centros   | 717  |
| IPI00386527 | Q9H2L5-2 | RASSF4   | Isoform 2 of Ras ass   | 241  |
| IPI00386936 | Q96KP6   | TNIP3    | TNFAIP3-interacting    | 39   |
| IPI00394847 | Q2TAL5-1 | SMTNL2   | Isoform 1 of Smooth    | 354  |
| IPI00395865 | Q16576   | RBBP7    | Histone-binding prote  | 159  |
| IPI00397930 | Q9HCK1   | ZDBF2    | DBF4-type zinc finge   | 1957 |
| IPI00398795 | O95197-2 | RTN3     | Isoform 2 of Reticulo  | 521  |
| IPI00398822 | Q9BQ52-2 | ELAC2    | Isoform 2 of Zinc pho  | 5    |
| IPI00398822 | Q9BQ52-2 | ELAC2    | Isoform 2 of Zinc pho  | 7    |
| IPI00400860 | Q6PKX4   | DOK6     | Docking protein 6      | 58   |
| IPI00401800 | Q8TD10-3 | MIPOL1   | Isoform 3 of Mirror-in | 147  |
| IPI00401800 | Q8TD10-3 | MIPOL1   | Isoform 3 of Mirror-in | 153  |
| IPI00401870 | Q9H8M5-3 | CNNM2    | Isoform 3 of Metal tra | 540  |
| IPI00401870 | Q9H8M5-3 | CNNM2    | Isoform 3 of Metal tra | 545  |
| IPI00410277 | O95319-3 | CELF2    | Isoform 3 of CUGBP     | 136  |
| IPI00410687 | Q8IUH5-1 | ZDHHC17  | Isoform 1 of Palmitoy  | 296  |
| IPI00410687 | Q8IUH5-1 | ZDHHC17  | Isoform 1 of Palmitoy  | 299  |
| IPI00411425 | Q49MI3-2 | CERKL    | Isoform 2 of Ceramic   | 249  |
| IPI00411797 | Q075Z2   | BSPH1    | Bovine seminal plasr   | 120  |
| IPI00411937 | O00567   | SNORD110 | Nucleolar protein 56   | 478  |
| IPI00411937 | O00567   | SNORD110 | Nucleolar protein 56   | 480  |

|             |          |           |                         |      |
|-------------|----------|-----------|-------------------------|------|
| IPI00412740 | Q6ZN16-1 | MAP3K15   | Isoform 1 of Mitogen    | 751  |
| IPI00413144 | Q7Z2Z1-2 | C15orf42  | Isoform 2 of Treslin    | 711  |
| IPI00413144 | Q7Z2Z1-2 | C15orf42  | Isoform 2 of Treslin    | 714  |
| IPI00413214 | O15131   | KPNA5     | Importin subunit alph   | 113  |
| IPI00430472 | Q8N3C0   | ASCC3     | Activating signal coir  | 1609 |
| IPI00431197 | B5A981   | AGER      | Uncharacterized prof    | 150  |
| IPI00438705 | Q9UIS9-5 | MBD1      | Isoform 5 of Methyl-C   | 172  |
| IPI00442347 | Q6ZNJ8   | BRAT1     | FLJ00321 protein (Fr    | 92   |
| IPI00448465 | Q6UB98-1 | ANKRD12   | Isoform 1 of Ankyrin    | 928  |
| IPI00453473 | P62805   | HIST2H4B  | Histone H4              | 21   |
| IPI00453473 | P62805   | HIST2H4B  | Histone H4              | 21   |
| IPI00453473 | P62805   | HIST2H4B  | Histone H4              | 21   |
| IPI00455519 | Q6ICM0   | FLJ20464  | Em:AC005003.4 prof      | 50   |
| IPI00455626 | Q6XPR3   | RPTN      | Repetin                 | 233  |
| IPI00456628 | Q6F5E8   | RLTPR     | Leucine-rich repeat-d   | 126  |
| IPI00456744 | Q9Y3L3-1 | SH3BP1    | Isoform 1 of SH3 dor    | 3    |
| IPI00465429 | Q96T51-2 | RUFY1     | Isoform 2 of RUN an     | 117  |
| IPI00465429 | Q96T51-2 | RUFY1     | Isoform 2 of RUN an     | 447  |
| IPI00465439 | P04075   | ALDOA     | Fructose-bisphospha     | 294  |
| IPI00470603 | A6NL08   | OR6C75    | Olfactory receptor 6C   | 296  |
| IPI00470603 | A6NL08   | OR6C75    | Olfactory receptor 6C   | 300  |
| IPI00473113 | Q9Y2A4   | ZNF443    | cDNA FLJ12963 fis,      | 539  |
| IPI00478049 | Q86UD7-1 | TBC1D26   | Isoform 1 of TBC1 dc    | 92   |
| IPI00478060 | Q8N7B6-2 | PACRGL    | Isoform 2 of PACRG-     | 210  |
| IPI00478060 | Q8N7B6-2 | PACRGL    | Isoform 2 of PACRG-     | 212  |
| IPI00478371 | Q96JN0-1 | LCOR      | Isoform 1 of Ligand-c   | 400  |
| IPI00478371 | Q96JN0-1 | LCOR      | Isoform 1 of Ligand-c   | 402  |
| IPI00514054 | Q5SY13   | C9orf104  | Uncharacterized prof    | 7    |
| IPI00549762 | Q9H9Q4-1 | NHEJ1     | Isoform 1 of Non-hor    | 288  |
| IPI00549766 | Q5VSL9-1 | FAM40A    | Isoform 1 of Protein I  | 722  |
| IPI00549783 | Q8IVI9-1 | NOSTRIN   | Isoform 1 of Nostrin    | 113  |
| IPI00550026 | Q9HC44   | GPBP1L1   | Vasculin-like protein   | 199  |
| IPI00550026 | Q9HC44   | GPBP1L1   | Vasculin-like protein   | 200  |
| IPI00550026 | Q9HC44   | GPBP1L1   | Vasculin-like protein   | 203  |
| IPI00552569 | Q2NKX8   | ERCC6L    | DNA excision repair     | 48   |
| IPI00552569 | Q2NKX8   | ERCC6L    | DNA excision repair     | 55   |
| IPI00552710 | E7EMB7   | IPO11     | Putative uncharacter    | 157  |
| IPI00555565 | Q58FF6   | HSP90AB4P | Putative heat shock     | 414  |
| IPI00555890 | Q59GC3   | ANKRD11   | Ankyrin repeat doma     | 172  |
| IPI00555890 | Q59GC3   | ANKRD11   | Ankyrin repeat doma     | 174  |
| IPI00556231 | -        | LOC644936 | Actin/actin-like family | 174  |
| IPI00640697 | Q96GZ6-6 | SLC41A3   | Isoform 6 of Solute c   | 212  |
| IPI00640697 | Q96GZ6-6 | SLC41A3   | Isoform 6 of Solute c   | 224  |
| IPI00643465 | O95359-4 | TACC2     | Isoform 4 of Transfor   | 1339 |
| IPI00643465 | O95359-4 | TACC2     | Isoform 4 of Transfor   | 1346 |
| IPI00643605 | Q4V308   | LOC644249 | Uncharacterized prof    | 87   |
| IPI00644680 | Q96JG9   | ZNF469    | Zinc finger protein 46  | 3673 |
| IPI00645386 | E7EQ84   | ASPM      | Uncharacterized prof    | 246  |
| IPI00645435 | Q5JR59-3 | MTUS2     | Isoform 2 of Microtub   | 54   |
| IPI00651691 | Q9P225-2 | DNAH2     | Isoform 2 of Dynein h   | 698  |
| IPI00742682 | P12270   | TPR       | Nucleoprotein TPR       | 117  |
| IPI00742682 | P12270   | TPR       | Nucleoprotein TPR       | 124  |

|             |          |              |                        |      |
|-------------|----------|--------------|------------------------|------|
| IPI00742682 | P12270   | TPR          | Nucleoprotein TPR      | 1326 |
| IPI00743301 | -        | -            | Similar to Beta-Ala-H  | 24   |
| IPI00743955 | Q8TCY9-3 | URGCP        | up-regulated gene 4    | 328  |
| IPI00744182 | O60239   | SH3BP5       | SH3 domain-binding     | 240  |
| IPI00744711 | Q8TCS8   | PNPT1        | Polyribonucleotide nu  | 569  |
| IPI00782966 | Q9H2Y7   | ZFP106       | Zinc finger protein 10 | 574  |
| IPI00783112 | Q8NHS4-1 | C2orf63      | Isoform 1 of Unchara   | 21   |
| IPI00783112 | Q8NHS4-1 | C2orf63      | Isoform 1 of Unchara   | 150  |
| IPI00783185 | Q8NCX0-1 | CCDC150      | Isoform 1 of Coiled-c  | 212  |
| IPI00784140 | Q32VQ0   | GPCRLTM7     | Putative olfactory rec | 256  |
| IPI00784154 | P10809   | HSPD1        | 60 kDa heat shock p    | 516  |
| IPI00784201 | -        | CEP290       | 291 kDa protein        | 1918 |
| IPI00784201 | -        | CEP290       | 291 kDa protein        | 1923 |
| IPI00784869 | Q8IVF4-1 | DNAH10       | Isoform 1 of Dynein h  | 385  |
| IPI00785142 | B3KVR1   | SNRPN        | cDNA FLJ41124 fis, c   | 9    |
| IPI00785142 | B3KVR1   | SNRPN        | cDNA FLJ41124 fis, c   | 12   |
| IPI00788750 | B4DYR8   | ZBTB38       | cDNA FLJ56473, hig     | 1083 |
| IPI00790221 | Q9UFE4-1 | CCDC39       | Isoform 1 of Coiled-c  | 743  |
| IPI00792792 | Q8N2S1-3 | LTBP4        | Isoform 3 of Latent-tr | 5    |
| IPI00797837 | B4DIA2   | CCHCR1       | cDNA FLJ54473, hig     | 680  |
| IPI00827576 | A2N0S5   | -            | VH6DJ protein (Frag    | 60   |
| IPI00847543 | O15050   | TRANK1       | TPR and ankyrin rep    | 312  |
| IPI00847543 | O15050   | TRANK1       | TPR and ankyrin rep    | 2246 |
| IPI00852749 | Q92623   | TTC9         | Tetratricopeptide rep  | 165  |
| IPI00852806 | Q9Y2D4-1 | EXOC6B       | Isoform 1 of Exocyst   | 189  |
| IPI00853314 | A5XEK0   | ANK2         | Uncharacterized prot   | 122  |
| IPI00855732 | Q86V40-2 | C2orf89      | Isoform 2 of UPF063    | 181  |
| IPI00872208 | O15417-1 | TNRC18       | Isoform 1 of Trinucle  | 2896 |
| IPI00872996 | A8MX80   | LOC100129307 | Putative UPF0607 pr    | 73   |
| IPI00873849 | Q08116-1 | RGS1         | Isoform 1 of Regulato  | 13   |
| IPI00873849 | Q08116-1 | RGS1         | Isoform 1 of Regulato  | 24   |
| IPI00873849 | Q08116-1 | RGS1         | Isoform 1 of Regulato  | 164  |
| IPI00883989 | A0AVI2-1 | FER1L5       | Isoform 1 of Fer-1-lik | 1284 |
| IPI00885067 | Q9H5L6   | THAP9        | THAP domain-contai     | 667  |
| IPI00888430 | Q9UFH2-1 | DNAH17       | Isoform 1 of Dynein h  | 3579 |
| IPI00895883 | B0I1T2-3 | MYO1G        | Isoform 3 of Myosin-   | 518  |
| IPI00896427 | Q5T0Z8-1 | C6orf132     | Isoform 1 of Unchara   | 583  |
| IPI00903140 | B3KT78   | ANKRD13A     | cDNA FLJ37811 fis, c   | 24   |
| IPI00908414 | B4DHB9   | CIAPIN1      | cDNA FLJ58887, hig     | 163  |
| IPI00908414 | B4DHB9   | CIAPIN1      | cDNA FLJ58887, hig     | 180  |
| IPI00909755 | B4E0D9   | ZNF434       | cDNA FLJ56278, hig     | 170  |
| IPI00909755 | B4E0D9   | ZNF434       | cDNA FLJ56278, hig     | 191  |
| IPI00910161 | B4DYU8   | C4orf21      | cDNA FLJ52091          | 864  |
| IPI00910161 | B4DYU8   | C4orf21      | cDNA FLJ52091          | 866  |
| IPI00910186 | B4DXM8   | PIK3R3       | cDNA FLJ60942, hig     | 328  |
| IPI00910186 | B4DXM8   | PIK3R3       | cDNA FLJ60942, hig     | 329  |
| IPI00910799 | B4DSQ4   | SUGP2        | cDNA FLJ55365, hig     | 402  |
| IPI00915941 | E7ESH4   | HSPD1        | Uncharacterized prot   | 233  |
| IPI00921171 | -        | ATP2B3       | Similar to Plasma me   | 72   |
| IPI00921171 | -        | ATP2B3       | Similar to Plasma me   | 79   |
| IPI00922130 | B7Z8M0   | CBWD1        | cDNA FLJ50340, hig     | 204  |
| IPI00922181 | B7Z8Z6   | MCM2         | cDNA FLJ53276, mo      | 457  |

|             |          |              |                         |      |
|-------------|----------|--------------|-------------------------|------|
| IPI00922411 | Q8WUV3   | PRMT3        | protein arginine N-m    | 4    |
| IPI00926254 | E7EV03   | MAP2         | Uncharacterized prot    | 226  |
| IPI00926507 | F8WEA2   | TXNDC3       | Uncharacterized prot    | 26   |
| IPI00930240 | -        | LOC400986    | ankyrin repeat doma     | 911  |
| IPI00930240 | -        | LOC400986    | ankyrin repeat doma     | 1081 |
| IPI00939720 | Q9NR09   | BIRC6        | Baculoviral IAP repe    | 3675 |
| IPI00941732 | Q14241   | TCEB3        | Transcription elongat   | 38   |
| IPI00942295 | P35372-5 | OPRM1        | Isoform 5 of Mu-type    | 410  |
| IPI00942526 | E7ER16   | SMEK1        | Uncharacterized prot    | 4    |
| IPI00947363 | B4DN41   | DDX5         | cDNA FLJ53366, hig      | 45   |
| IPI00955882 | P86452   | ZBED6        | Zinc finger BED dom     | 467  |
| IPI00955882 | P86452   | ZBED6        | Zinc finger BED dom     | 479  |
| IPI00964486 | D6RG16   | SIL1         | Uncharacterized prot    | 119  |
| IPI00965371 | Q6ZMT9-1 | DTHD1        | Uncharacterized prot    | 202  |
| IPI00965371 | Q6ZMT9-1 | DTHD1        | Uncharacterized prot    | 204  |
| IPI00966031 | D6RBW1   | EIF4E        | Uncharacterized prot    | 11   |
| IPI00966031 | D6RBW1   | EIF4E        | Uncharacterized prot    | 12   |
| IPI00966839 | -        | MXD4         | Protein                 | 42   |
| IPI00967464 | D6RAJ2   | SLC27A6      | Uncharacterized prot    | 2    |
| IPI00973984 | E5RHY6   | C8orf44-SGK3 | Uncharacterized prot    | 8    |
| IPI00977330 | B7Z9Q3   | ANO3         | Uncharacterized prot    | 15   |
| IPI00980772 | -        | RAB2A        | Protein                 | 75   |
| IPI00981358 | E9PQV6   | MICU1        | Uncharacterized prot    | 186  |
| IPI00982698 | -        | -            | Similar to Postmeioti   | 5    |
| IPI00983620 | -        | LOC650157    | peptidyl-prolyl cis-tra | 82   |
| IPI00984934 | E5RIG4   | NCALD        | Uncharacterized prot    | 102  |
| IPI01012052 | -        | ATG16L2      | Protein                 | 76   |
| IPI01014779 | Q14172   | DMD          | Uncharacterized prot    | 31   |
| IPI01014779 | Q14172   | DMD          | Uncharacterized prot    | 35   |
| IPI01014833 | F5GZJ2   | MSR1         | Uncharacterized prot    | 19   |
| IPI01018177 | Q6ZU59   | ANKRD26P1    | cDNA FLJ43980 fis,      | 2    |
| IPI01018177 | Q6ZU59   | ANKRD26P1    | cDNA FLJ43980 fis,      | 15   |
| IPI01021209 | F8VTY5   | MGAT4C       | Uncharacterized prot    | 98   |
| IPI01025139 | -        | -            | 30 kDa protein          | 144  |
| IPI01025367 | -        | ALDH6A1      | 56 kDa protein          | 104  |



|                  |
|------------------|
| Mono-methylation |
| Tri-methylation  |
| Mono-methylation |
| Tri-methylation  |
| Mono-methylation |
| Mono-methylation |
| Mono-methylation |
| Di-methylation   |
| Mono-methylation |
| Mono-methylation |
| Di-methylation   |
| Di-methylation   |
| Mono-methylation |
| Mono-methylation |
| Tri-methylation  |
| Mono-methylation |
| Di-methylation   |
| Mono-methylation |
| Mono-methylation |
| Di-methylation   |
| Tri-methylation  |
| Mono-methylation |
| Tri-methylation  |
| Mono-methylation |
| Mono-methylation |
| Mono-methylation |
| Di-methylation   |
| Mono-methylation |
| Di-methylation   |
| Mono-methylation |
| Di-methylation   |
| Tri-methylation  |
| Mono-methylation |
| Di-methylation   |
| Mono-methylation |
| Mono-methylation |
| Di-methylation   |
| Mono-methylation |

|                  |
|------------------|
| Mono-methylation |
| Mono-methylation |
| Mono-methylation |
| Mono-methylation |
| Di-methylation   |
| Tri-methylation  |
| Mono-methylation |
| Mono-methylation |
| Mono-methylation |
| Mono-methylation |
| Di-methylation   |
| Mono-methylation |
| Tri-methylation  |
| Di-methylation   |
| Mono-methylation |
| Mono-methylation |
| Mono-methylation |
| Di-methylation   |
| Tri-methylation  |
| Mono-methylation |
| Mono-methylation |
| Tri-methylation  |
| Di-methylation   |
| Mono-methylation |
| Mono-methylation |
| Mono-methylation |
| Di-methylation   |
| Mono-methylation |
| Di-methylation   |
| Tri-methylation  |
| Mono-methylation |
| Di-methylation   |
| Di-methylation   |
| Mono-methylation |
| Tri-methylation  |
| Mono-methylation |
| Tri-methylation  |
| Mono-methylation |



|                  |
|------------------|
| Di-methylation   |
| Tri-methylation  |
| Tri-methylation  |
| Mono-methylation |
| Di-methylation   |
| Di-methylation   |
| Di-methylation   |
| Mono-methylation |
| Di-methylation   |
| Mono-methylation |
| Di-methylation   |
| Mono-methylation |
| Mono-methylation |
| Mono-methylation |
| Di-methylation   |
| Di-methylation   |
| Tri-methylation  |
| Mono-methylation |
| Di-methylation   |
| Mono-methylation |
| Di-methylation   |
| Di-methylation   |
| Tri-methylation  |
| Mono-methylation |
| Mono-methylation |
| Mono-methylation |
| Tri-methylation  |
| Mono-methylation |
| Mono-methylation |
| Di-methylation   |
| Di-methylation   |
| Tri-methylation  |
| Mono-methylation |
| Di-methylation   |
| Di-methylation   |
| Di-methylation   |
| Tri-methylation  |
| Tri-methylation  |
| Di-methylation   |
| Di-methylation   |
| Tri-methylation  |
| Tri-methylation  |
| Tri-methylation  |
| Tri-methylation  |
| Mono-methylation |
| Mono-methylation |
| Mono-methylation |
| Mono-methylation |

|                  |
|------------------|
| Di-methylation   |
| Di-methylation   |
| Di-methylation   |
| Mono-methylation |
| Tri-methylation  |
| Mono-methylation |
| Di-methylation   |
| Di-methylation   |
| Mono-methylation |
| Mono-methylation |
| Mono-methylation |
| Mono-methylation |
| Di-methylation   |
| Di-methylation   |
| Di-methylation   |
| Mono-methylation |
| Mono-methylation |
| Mono-methylation |
| Tri-methylation  |
| Tri-methylation  |
| Mono-methylation |
| Tri-methylation  |
| Mono-methylation |
| Tri-methylation  |
| Mono-methylation |
| Di-methylation   |
| Mono-methylation |
| Tri-methylation  |
| Mono-methylation |
| Mono-methylation |
| Mono-methylation |
| Tri-methylation  |
| Di-methylation   |
| Di-methylation   |
| Mono-methylation |
| Mono-methylation |
| Tri-methylation  |
| Tri-methylation  |
| Di-methylation   |
| Di-methylation   |
| Mono-methylation |
| Di-methylation   |
| Mono-methylation |
| Mono-methylation |
| Di-methylation   |
| Tri-methylation  |
| Mono-methylation |
| Di-methylation   |

|                  |
|------------------|
| Mono-methylation |
| Tri-methylation  |
| Mono-methylation |
| Di-methylation   |
| Mono-methylation |
| Mono-methylation |
| Mono-methylation |
| Mono-methylation |
| Tri-methylation  |
| Mono-methylation |
| Mono-methylation |
| Mono-methylation |
| Mono-methylation |
| Di-methylation   |
| Mono-methylation |
| Mono-methylation |
| Tri-methylation  |
| Di-methylation   |
| Tri-methylation  |
| Di-methylation   |
| Di-methylation   |
| Tri-methylation  |
| Mono-methylation |
| Di-methylation   |
| Tri-methylation  |
| Mono-methylation |
| Mono-methylation |
| Tri-methylation  |
| Mono-methylation |
| Mono-methylation |
| Mono-methylation |
| Mono-methylation |
| Tri-methylation  |
| Mono-methylation |
| Mono-methylation |
| Mono-methylation |
| Di-methylation   |
| Tri-methylation  |
| Mono-methylation |
| Tri-methylation  |
| Mono-methylation |
| Mono-methylation |
| Di-methylation   |
| Di-methylation   |
| Tri-methylation  |
| Mono-methylation |
| Tri-methylation  |
| Mono-methylation |

|                  |
|------------------|
| Mono-methylation |
| Mono-methylation |
| Di-methylation   |
| Di-methylation   |
| Mono-methylation |
| Mono-methylation |
| Mono-methylation |
| Tri-methylation  |
| Mono-methylation |
| Mono-methylation |
| Di-methylation   |
| Mono-methylation |
| Mono-methylation |
| Di-methylation   |
| Tri-methylation  |
| Mono-methylation |
| Di-methylation   |
| Mono-methylation |
| Tri-methylation  |
| Tri-methylation  |
| Tri-methylation  |
| Mono-methylation |
| Mono-methylation |
| Mono-methylation |
| Tri-methylation  |
| Di-methylation   |
| Mono-methylation |
| Mono-methylation |
| Mono-methylation |
| Di-methylation   |
| Mono-methylation |
| Tri-methylation  |
| Di-methylation   |
| Mono-methylation |
| Mono-methylation |
| Mono-methylation |
| Tri-methylation  |

|                  |
|------------------|
| Mono-methylation |
| Di-methylation   |
| Mono-methylation |
| Mono-methylation |
| Mono-methylation |
| Di-methylation   |
| Mono-methylation |
| Di-methylation   |
| Di-methylation   |
| Mono-methylation |
| Tri-methylation  |
| Mono-methylation |
| Di-methylation   |
| Mono-methylation |
| Di-methylation   |
| Di-methylation   |
| Mono-methylation |
| Di-methylation   |
| Mono-methylation |
| Mono-methylation |
| Di-methylation   |
| Di-methylation   |
| Di-methylation   |
| Mono-methylation |
| Mono-methylation |
| Tri-methylation  |
| Mono-methylation |
| Mono-methylation |
| Tri-methylation  |
| Di-methylation   |
| Mono-methylation |
| Tri-methylation  |
| Mono-methylation |
| Mono-methylation |

|                  |
|------------------|
| Mono-methylation |
| Tri-methylation  |
| Tri-methylation  |
| Di-methylation   |
| Di-methylation   |
| Tri-methylation  |
| Mono-methylation |
| Mono-methylation |
| Di-methylation   |
| Mono-methylation |
| Di-methylation   |
| Tri-methylation  |
| Tri-methylation  |
| Mono-methylation |
| Mono-methylation |
| Mono-methylation |
| Di-methylation   |
| Mono-methylation |
| Mono-methylation |
| Di-methylation   |
| Di-methylation   |
| Di-methylation   |
| Mono-methylation |
| Mono-methylation |
| Mono-methylation |
| Tri-methylation  |
| Tri-methylation  |
| Mono-methylation |
| Tri-methylation  |
| Mono-methylation |
| Di-methylation   |
| Mono-methylation |
| Di-methylation   |
| Di-methylation   |
| Mono-methylation |
| Tri-methylation  |
| Tri-methylation  |
| Tri-methylation  |
| Tri-methylation  |
| Di-methylation   |
| Mono-methylation |
| Mono-methylation |
| Mono-methylation |
| Mono-methylation |

|                  |
|------------------|
| Tri-methylation  |
| Mono-methylation |
| Mono-methylation |
| Di-methylation   |
| Mono-methylation |
| Mono-methylation |
| Mono-methylation |
| Tri-methylation  |
| Mono-methylation |
| Tri-methylation  |
| Mono-methylation |
| Tri-methylation  |
| Tri-methylation  |
| Mono-methylation |
| Tri-methylation  |
| Mono-methylation |
| Tri-methylation  |
| Tri-methylation  |
| Di-methylation   |
| Mono-methylation |
| Di-methylation   |
| Di-methylation   |
| Tri-methylation  |
| Tri-methylation  |
| Mono-methylation |
| Di-methylation   |
| Tri-methylation  |
| Mono-methylation |
| Mono-methylation |
| Mono-methylation |
| Mono-methylation |
| Tri-methylation  |
| Tri-methylation  |
| Di-methylation   |
| Di-methylation   |
| Mono-methylation |
| Mono-methylation |
| Mono-methylation |
| Mono-methylation |
| Tri-methylation  |
| Mono-methylation |

|                  |
|------------------|
| Di-methylation   |
| Mono-methylation |
| Di-methylation   |
| Di-methylation   |
| Di-methylation   |
| Tri-methylation  |
| Mono-methylation |
| Di-methylation   |
| Di-methylation   |
| Tri-methylation  |
| Mono-methylation |
| Tri-methylation  |
| Di-methylation   |
| Mono-methylation |
| Mono-methylation |
| Mono-methylation |
| Di-methylation   |
| Mono-methylation |
| Di-methylation   |
| Mono-methylation |
| Di-methylation   |
| Mono-methylation |
